# Supplementary material for: Stereochemistry and mechanistic insights in the [2t + 2i + 2i] annulations of thioketenes and imines
Source: Royal Society of Chemistry journal article supplement (doi:10.1039/c7ob02212c), 2017-01-01
Supplement: c7ob02212c2.pdf [file c7ob02212c2.pdf]

## Electronic Supplementary Information

### Part II: Theoretical Calculations

#### **Stereochemistry and mechanistic insights in the $[2^t + 2^i + 2^i]$ annulations of thioketenes and imines**

Wei He,<sup>†a</sup> Junpeng Zhuang,<sup>†a</sup> Hongguang Du, Zhanhui Yang<sup>\*a</sup> and Jiayi Xu<sup>\*a</sup>

<sup>a</sup> State Key Laboratory of Chemical Resource Engineering, Department of Organic Chemistry, Faculty of Science, Beijing University of Chemical Technology, Beijing 100029, P. R. China.  
E-mail: zhyang@mail.buct.edu.cn (Z. Yang); jxxu@mail.buct.edu.cn (J. X. Xu); Fax: +86 10 64435565

<sup>†</sup> These two authors contributed equally.

### Contents

|                                                             |            |
|-------------------------------------------------------------|------------|
| <b>1. Details of Calculations.....</b>                      | <b>S2</b>  |
| <b>2. Computed Energies of All Stationary Points.....</b>   | <b>S2</b>  |
| <b>3. Intrinsic Reaction Coordinate (IRC) Analysis.....</b> | <b>S5</b>  |
| <b>4. Coordinates of All Stationary Points.....</b>         | <b>S15</b> |

## 1. Details of Calculations

All the DFT calculations were performed using Gaussian 09 program package.<sup>[1]</sup> The optimization and frequency calculation of the minima and transition states were performed at B3LYP/6-31g(d) level. Frequency calculations were used to verify if the real minima or transition states were obtained and to produce thermal corrections to Gibbs free energy. IRC calculations were performed at the same level of theory to confirm the calculated transition states connect the correct reactants and products. The single point energies based on the optimized structures were calculated at M06-2x/6-311++g(d,p) level.

[1] M. J. Frisch, G. W. Trucks, H. B. Schlegel, G. E. Scuseria, M. A. Robb, J. R. Cheeseman, G. Scalmani, V. Barone, B. Mennucci, G. A. Petersson, H. Nakatsuji, M. Caricato, X. Li, H. P. Hratchian, A. F. Izmaylov, J. Bloino, G. Zheng, J. L. Sonnenberg, M. Hada, M. Ehara, K. Toyota, R. Fukuda, J. Hasegawa, M. Ishida, T. Nakajima, Y. Honda, O. Kitao, H. Nakai, T. Vreven, J. A. Montgomery, Jr., J. E. Peralta, F. Ogliaro, M. Bearpark, J. J. Heyd, E. Brothers, K. N. Kudin, V. N. Staroverov, R. Kobayashi, J. Normand, K. Raghavachari, A. Rendell, J. C. Burant, S. S. Iyengar, J. Tomasi, M. Cossi, N. Rega, J. M. Millam, M. Klene, J. E. Knox, J. B. Cross, V. Bakken, C. Adamo, J. Jaramillo, R. Gomperts, R. E. Stratmann, O. Yazyev, A. J. Austin, R. Cammi, C. Pomelli, J. W. Ochterski, R. L. Martin, K. Morokuma, V. G. Zakrzewski, G. A. Voth, P. Salvador, J. J. Dannenberg, S. Dapprich, A. D. Daniels, Ö. Farkas, J. B. Foresman, J. V. Ortiz, J. Cioslowski, and D. J. Fox, *Gaussian 09*, Revision D.01, (Gaussian, Inc., Wallingford CT, 2009).

## 2. Computed energies of all stationary points

Table SI-1 Calculated Gibbs free energy changes at 298 K ( $\Delta G$ , in kcal/mol)

| Entry | <b>1</b>  | <b>TS1-endo</b> | <b>C-endo</b> | <b>TS2-Si</b> | <b>7</b> | <b>4</b> | <b>TS1-exo</b> | <b>C-exo</b> | <b>TS2-Re</b> | <b>8</b> |
|-------|-----------|-----------------|---------------|---------------|----------|----------|----------------|--------------|---------------|----------|
| 1     | <b>1c</b> | 6.9             | -17.4         | 3.4           | -27.9    | -32.9    | 9.64           | -11.4        | 18.2          | -17.0    |
| 2     | <b>1g</b> | 7.4             | -20.3         | 6.6           | -31.7    | -35.9    | 10.5           | -13.5        | 18.1          | -22.7    |
| 3     | <b>1k</b> | 7.2             | -20.0         | 5.8           | -23.8    | -33.5    | 10.4           | -13.5        | 17.3          | -14.3    |
| 4     | <b>1m</b> | 4.4             | -20.2         | 2.8           | -33.0    | -35.9    | 8.2            | -12.3        | 15.7          | -23.6    |
| 5     | <b>1n</b> | 7.0             | -18.6         | 7.8           | -16.5    | -29.9    | 10.3           | -12.2        | 18.8          | -10.3    |

Table SI-2. Sum of electronic and thermal free energies ( $G$ , in Hartree, m06-2x/6-311++g(d,p)), thermal corrections to Gibbs free energy (TCGFE, in Hartree, b3lyp/6-31g(d)), total free energies ( $G'$ , in Hartree), and Gibbs free energy changes ( $\Delta G$ , in kcal/mol) at 298 K in the gas phase

| Structure | $G$            | TCGFE    | $G'$           | $\Delta G$ , in kcal/mol |
|-----------|----------------|----------|----------------|--------------------------|
| <b>1c</b> | -1109.61305771 | 0.232007 | -1109.38105071 |                          |

|              |                |          |                |           |
|--------------|----------------|----------|----------------|-----------|
| imine 5      | -403.045003056 | 0.127196 | -402.91780706  |           |
| 1c + imine 5 |                |          | -1512.29885777 | 0         |
| TS1-endo-c   | -1512.67079475 | 0.382958 | -1512.28783675 | 6.91579   |
| C-endo-c     | -1512.71393503 | 0.387308 | -1512.32662703 | -17.42547 |
| TS2-Si-c     | -1512.67977689 | 0.386368 | -1512.29340889 | 3.41922   |
| 7c           | -1512.73349630 | 0.390189 | -1512.34330730 | -27.8925  |
| 4c           | -1512.74135734 | 0.390101 | -1512.35125634 | -32.8806  |
| TS1-exo-c    | -1512.66607451 | 0.382583 | -1512.28349151 | 9.64247   |
| C-exo-c      | -1512.70288443 | 0.385817 | -1512.31706743 | -11.42673 |
| TS2-Re-c     | -1512.65625498 | 0.386336 | -1512.26991898 | 18.15937  |
| 8c           | -1512.71607029 | 0.390176 | -1512.32589429 | -16.96567 |
| 1g           | -917.899888260 | 0.182858 | -917.71703026  |           |
| 1g + imine 5 |                |          | -1320.63483732 | 0         |
| TS1-endo-g   | -1320.95700391 | 0.334004 | -1320.62299991 | 7.42809   |
| C-endo-g     | -1321.00646446 | 0.339229 | -1320.66723546 | -20.33014 |
| TS2-Si-g     | -1320.96072859 | 0.336420 | -1320.62430859 | 6.60688   |
| 7g           | -1321.02818063 | 0.342803 | -1320.68537763 | -31.71452 |
| 4g           | -1321.03469897 | 0.342718 | -1320.69198097 | -35.85818 |
| TS1-exo-g    | -1320.95149910 | 0.333466 | -1320.61803310 | 10.54481  |
| C-exo-g      | -1320.99429934 | 0.338015 | -1320.65628434 | -13.45821 |
| TS2-Re-g     | -1320.94295241 | 0.337001 | -1320.60595141 | 18.12618  |
| 8g           | -1321.01428475 | 0.343327 | -1320.67095775 | -22.66591 |
| 1k           | -996.508908539 | 0.236243 | -996.27266554  |           |
| 1k + imine 5 |                |          | -1399.1904726  | 0         |
| TS1-endo-k   | -1399.56547256 | 0.386424 | -1399.17904856 | 7.16869   |
| C-endo-k     | -1399.61438286 | 0.392036 | -1399.22234686 | -20.0014  |
| TS2-Si-k     | -1399.57062649 | 0.389349 | -1399.18127749 | 5.77002   |
| 7k           | -1399.62626850 | 0.397907 | -1399.22836150 | -23.77564 |
| 4k           | -1399.64092180 | 0.397105 | -1399.24381680 | -33.47399 |
| TS1-exo-k    | -1399.56031010 | 0.386393 | -1399.17391710 | 10.38873  |
| C-exo-k      | -1399.60296462 | 0.391032 | -1399.21193262 | -13.46637 |
| TS2-Re-k     | -1399.55372204 | 0.390807 | -1399.16291504 | 17.29263  |
| 8k           | -1399.60927807 | 0.396065 | -1399.21321307 | -14.26986 |
| 1m           | -1145.76216224 | 0.220389 | -1145.54175604 |           |
| 1m + imine 5 |                |          | -1548.4595631  | 0         |
| TS1-endo-m   | -1548.82195380 | 0.371044 | -1548.45248385 | 4.4423    |
| C-endo-m     | -1548.86600834 | 0.376636 | -1548.49180865 | -20.23439 |
| TS2-Si-m     | -1548.82989985 | 0.375484 | -1548.45517483 | 2.75368   |
| 7m           | -1548.89192517 | 0.379871 | -1548.51219554 | -33.02736 |
| 4m           | -1548.89533214 | 0.378501 | -1548.51683114 | -35.93624 |
| TS1-exo-m    | -1548.81846585 | 0.371947 | -1548.44651885 | 8.18539   |
| C-exo-m      | -1548.85354274 | 0.374454 | -1548.47908874 | -12.25252 |

|                     |                |          |                |           |
|---------------------|----------------|----------|----------------|-----------|
| <b>TS2-Re-m</b>     | -1548.80950682 | 0.374970 | -1548.43453682 | 15.70423  |
| <b>8m</b>           | -1548.87606380 | 0.378911 | -1548.49715280 | -23.58789 |
| <b>1n</b>           | -1035.81289694 | 0.263739 | -1035.54915794 |           |
| <b>1n + imine 5</b> |                |          | -1438.466965   | 0         |
| <b>TS1-endo-n</b>   | -1438.86984265 | 0.414090 | -1438.45575265 | 7.03586   |
| <b>C-endo-n</b>     | -1438.91623988 | 0.419592 | -1438.49664788 | -18.62629 |
| <b>TS2-Si-n</b>     | -1438.87245119 | 0.417890 | -1438.45456119 | 7.78351   |
| <b>7n</b>           | -1438.91819648 | 0.424965 | -1438.49323148 | -16.48247 |
| <b>4n</b>           | -1438.93929991 | 0.424712 | -1438.51458791 | -29.88383 |
| <b>TS1-exo-n</b>    | -1438.86487638 | 0.414384 | -1438.45049238 | 10.33673  |
| <b>C-exo-n</b>      | -1438.90495975 | 0.418630 | -1438.48632975 | -12.15156 |
| <b>TS2-Re-n</b>     | -1438.85503200 | 0.417975 | -1438.43705700 | 18.76755  |
| <b>8n</b>           | -1438.90753075 | 0.424082 | -1438.48344875 | -10.34371 |

### 3. Intrinsic reaction coordinate (IRC) analysis

Surprisingly, the IRC analyses of **TS2-Re** converged at **C-endo** rather than **C-exo** (see Figures SI4, SI8, SI12, SI16, and SI20). One of the reviewers thought that during the IRC the molecule was jumping off to a different part of PES, and also suggested that smaller steps for IRC might be helpful. During the revision of the manuscript, we met some difficulties in calculating the IRC analysis of **TS2-Re**. If we set the default stepsize as 5 or 10, the IRC calculation would normally terminate only after several steps. We have tried to use "calcall" in the command line with default stepsize, but the calculation also normally terminated only after several steps. When we set the stepsize as 20, the IRC calculations of the five **TS2-Re** transition states (Figures SI4, SI8, SI12, SI16, and SI20) all converged at **C-endo**. However, the *forward calculations* led to the correct products **8**. The *backward calculations* showed that the energy decreased very slowly and did not converge to **C-exo**. The final structures in the backward calculations seemed to be the structures between **C-exo** and **C-endo**. Further optimization of these final structures led to **C-endo**. We thought there might be transition states between **C-exo** and **C-endo**, but we could not locate it. The backward PES from **TS2-Re** to **C-exo** were more complex.

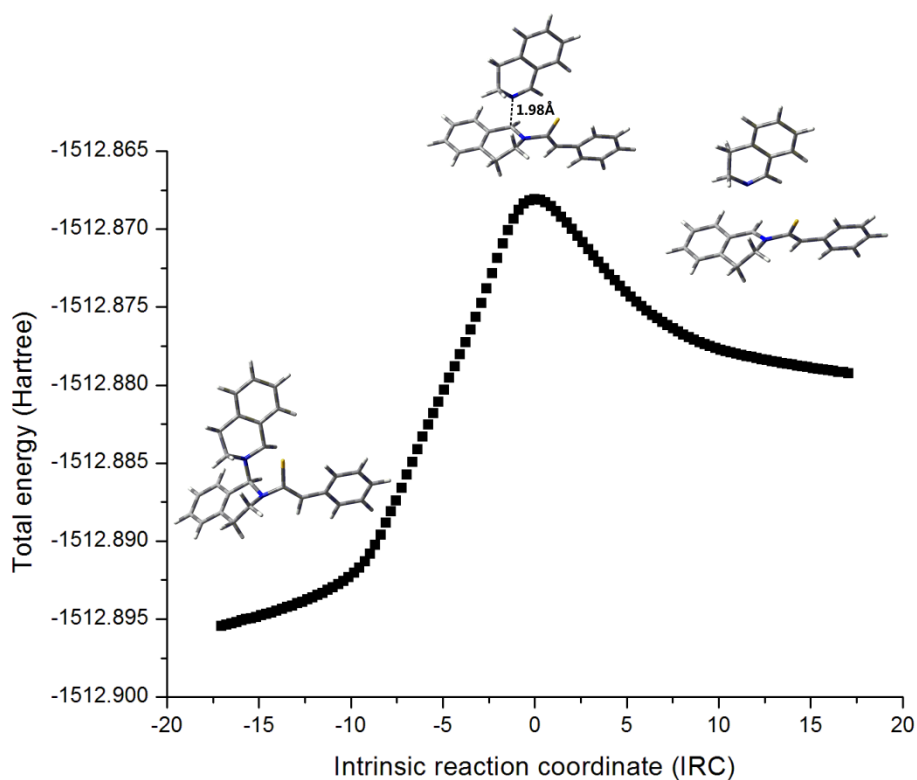

Figure SI-1. The IRC analysis of **TS1-endo-c**.

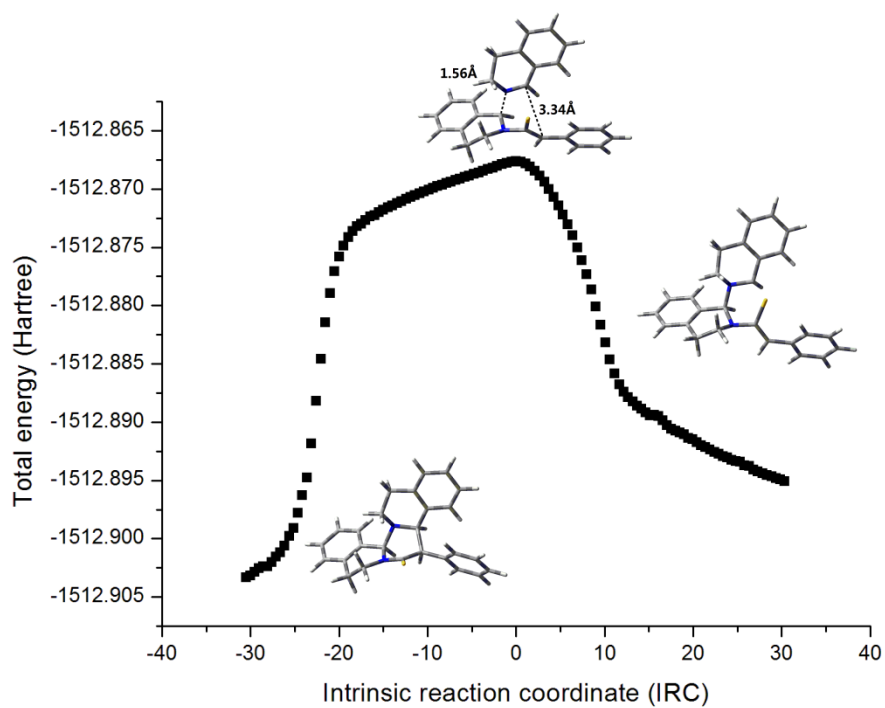

Figure SI-2. The IRC analysis of **TS2-Si-c**.

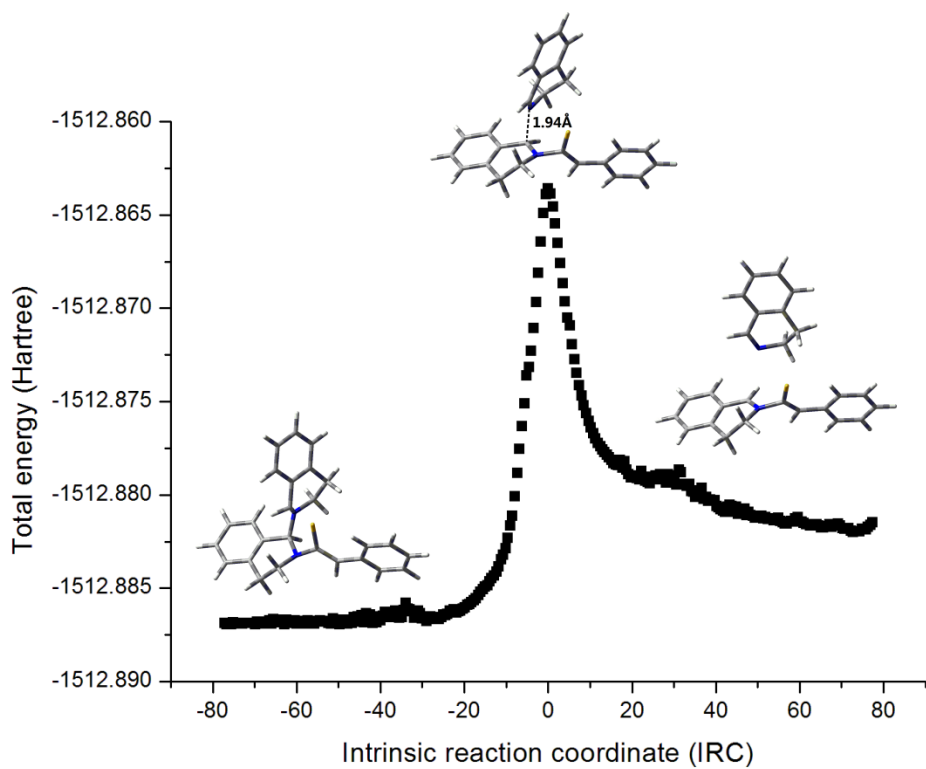

Figure SI-3. The IRC analysis of **TS1-exo-c**.

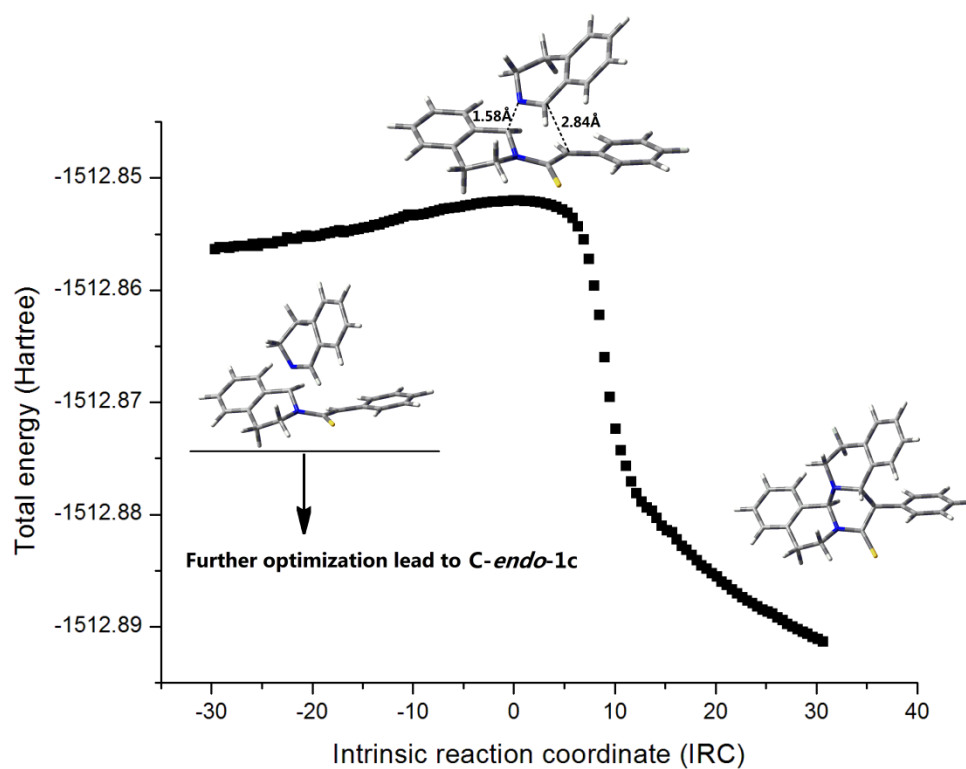

Figure SI-4. The IRC analysis of **TS2-Re-c**.

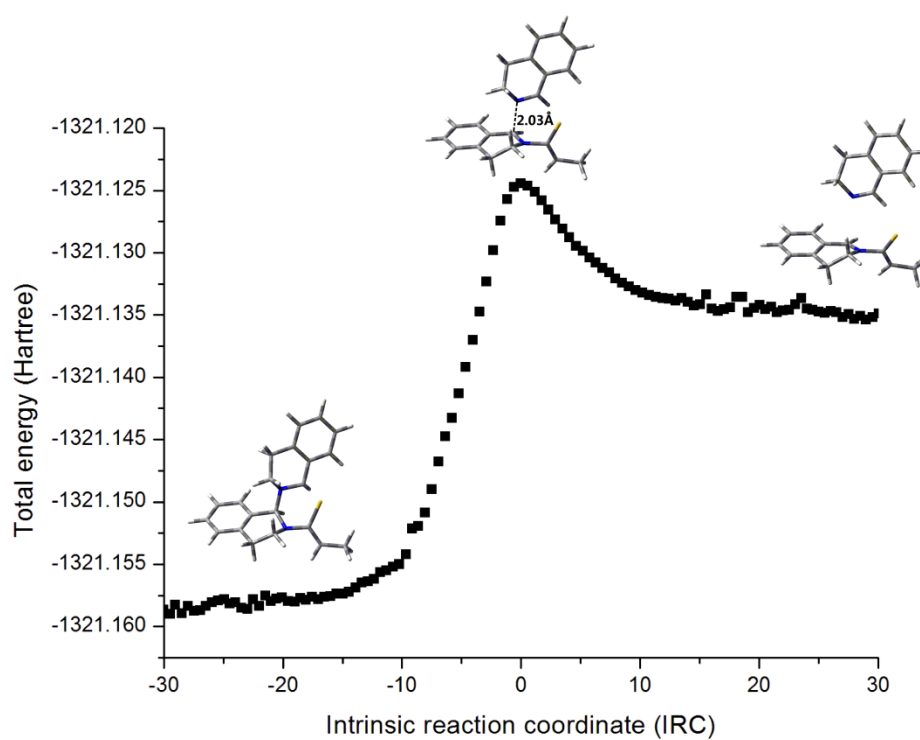

Figure SI-5. The IRC analysis of **TS1-endo-g**.

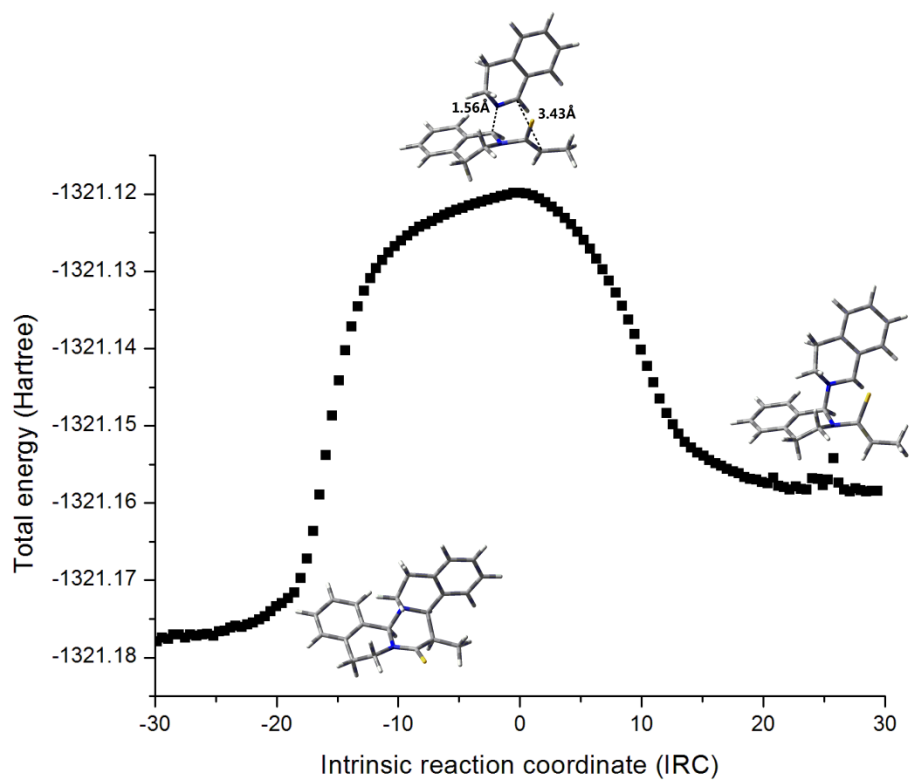

Figure SI-6. The IRC analysis of **TS2-Si-g**.

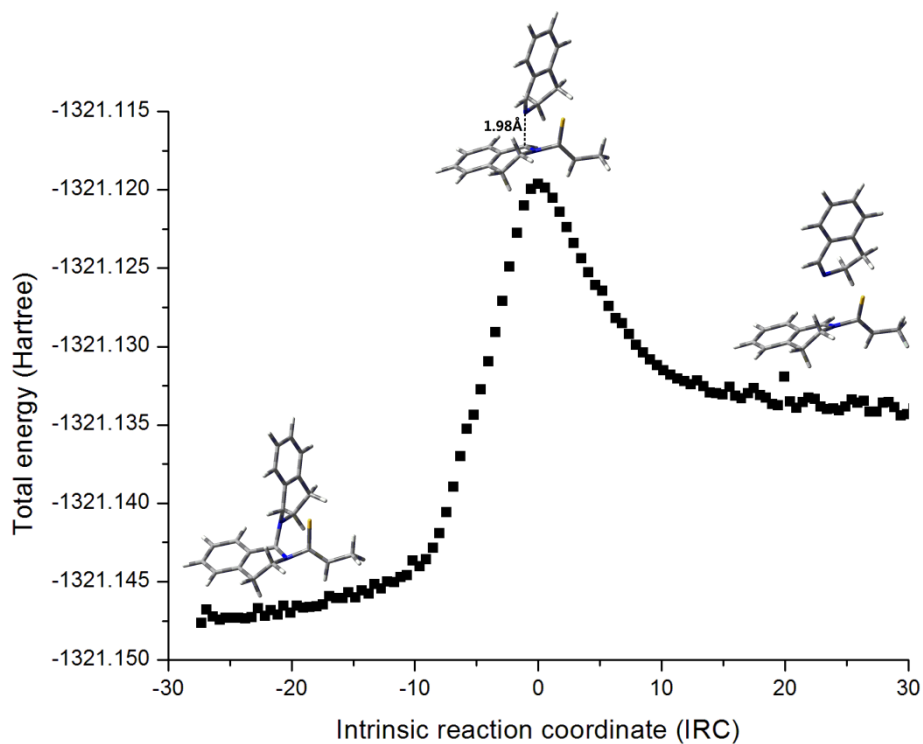

Figure SI-7. The IRC analysis of **TS1-exo-g**.



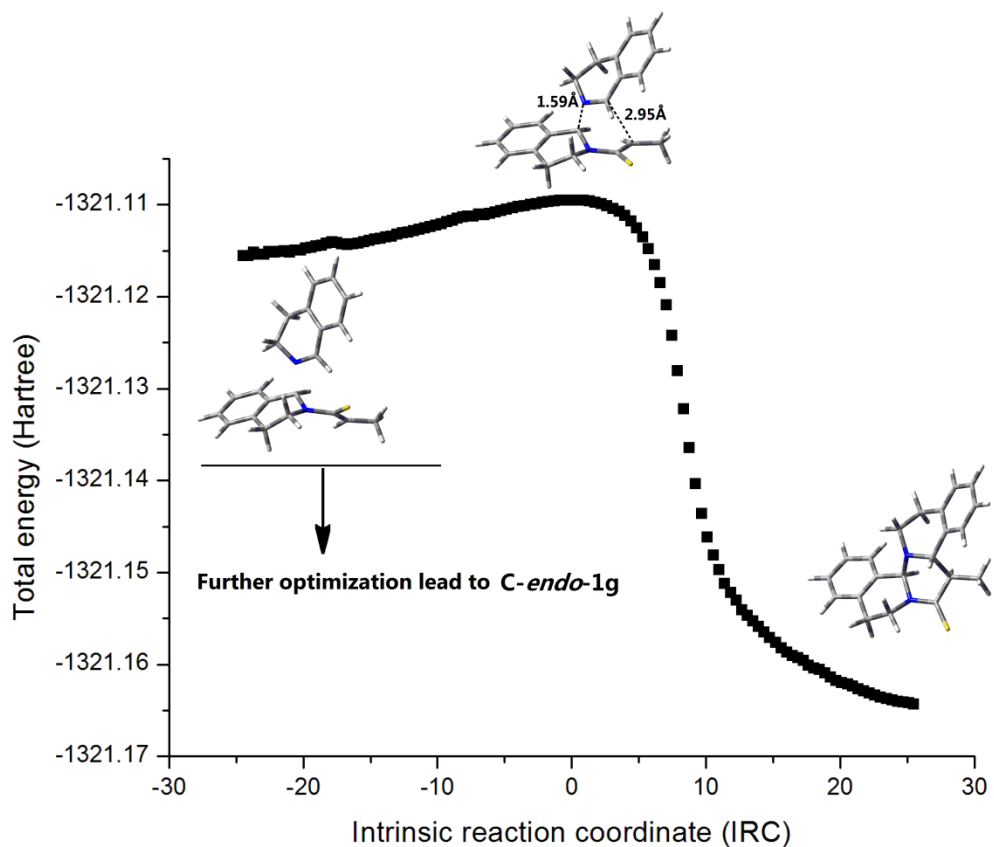

Figure SI-8. The IRC analysis of TS2-Re-g.

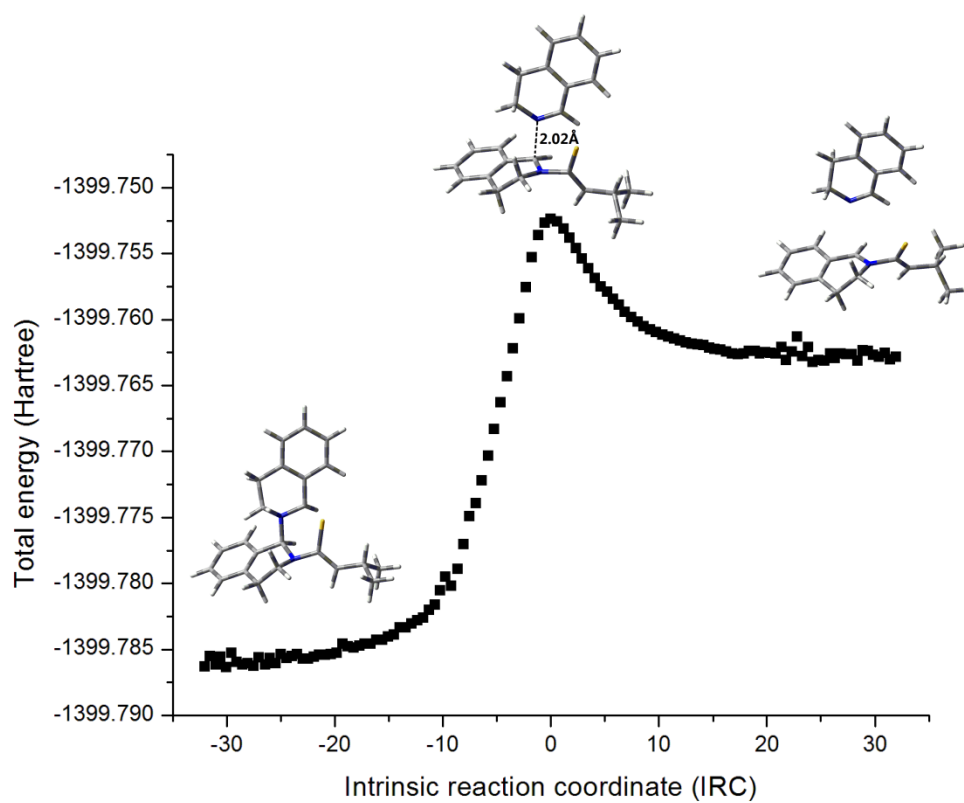

Figure SI-9. The IRC analysis of **TS1-endo-k**.

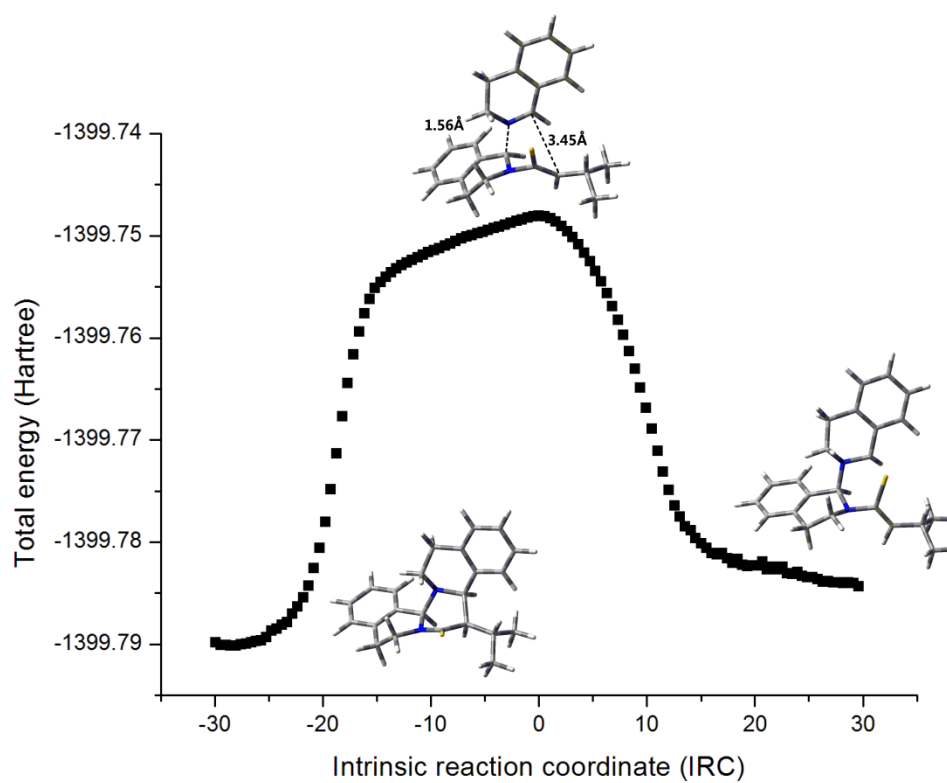

Figure SI-10. The IRC analysis of **TS2-Si-k**.

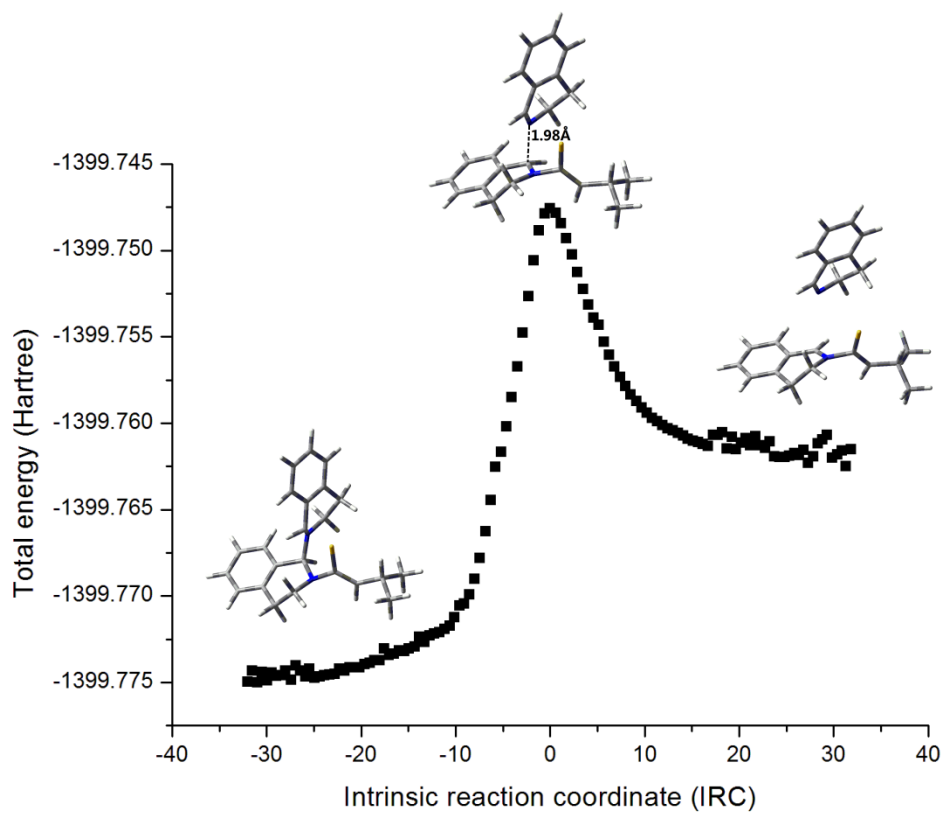

Figure SI-11. The IRC analysis of **TS1-exo-k**.

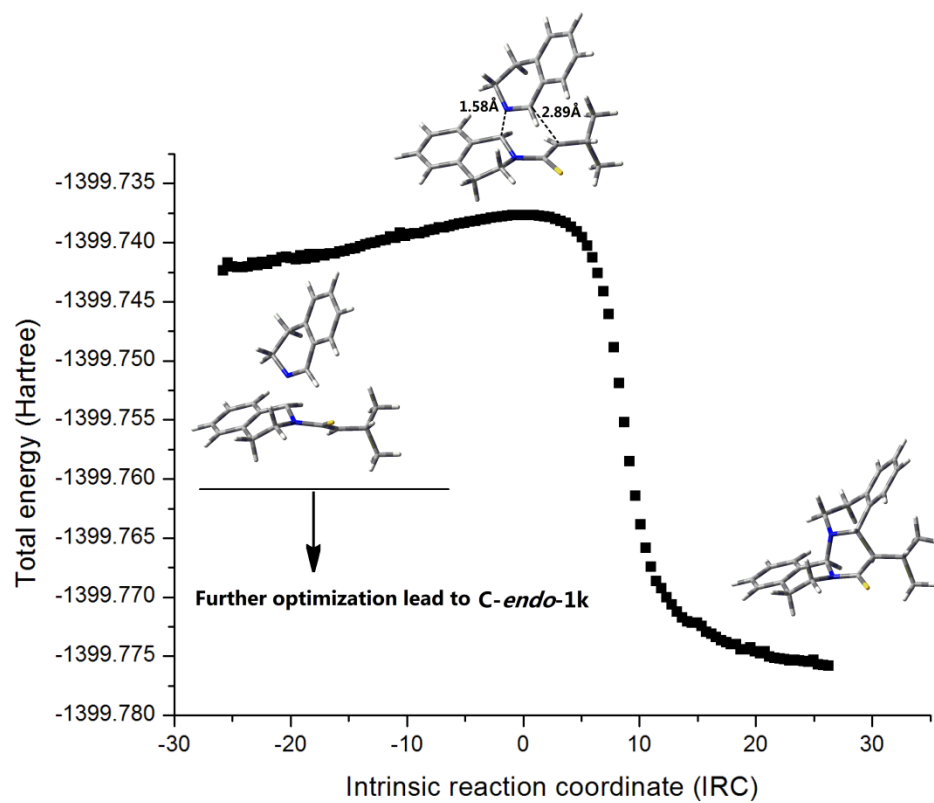

Figure SI-12. The IRC analysis of **TS2-*Re-k***.

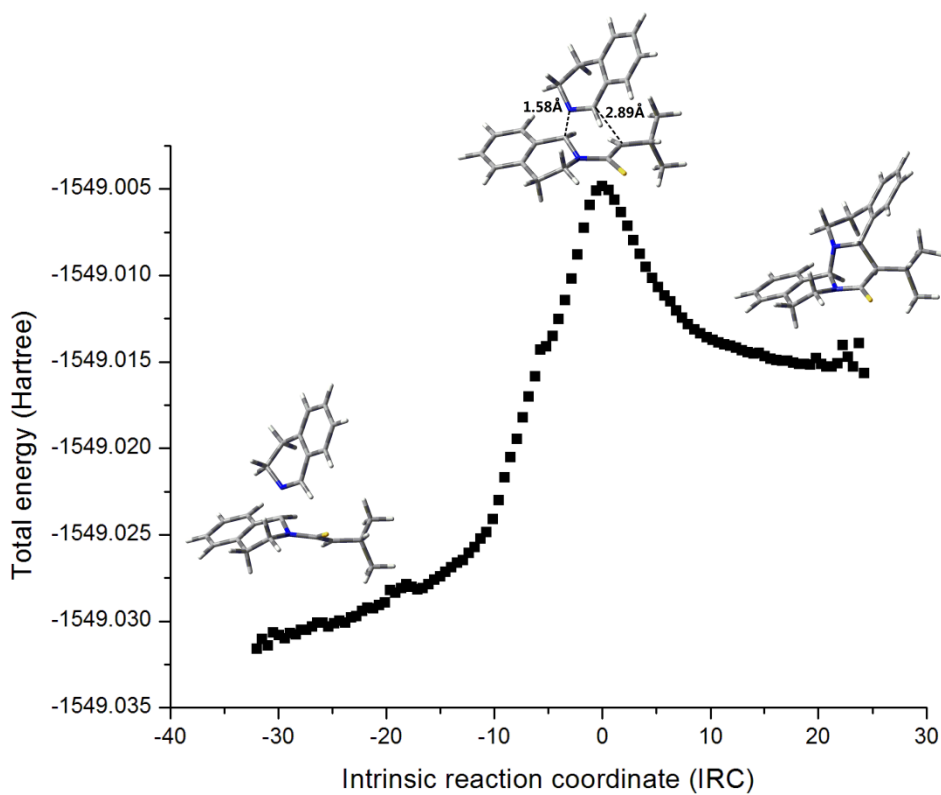

Figure SI-13. The IRC analysis of **TS1-*endo-m***.

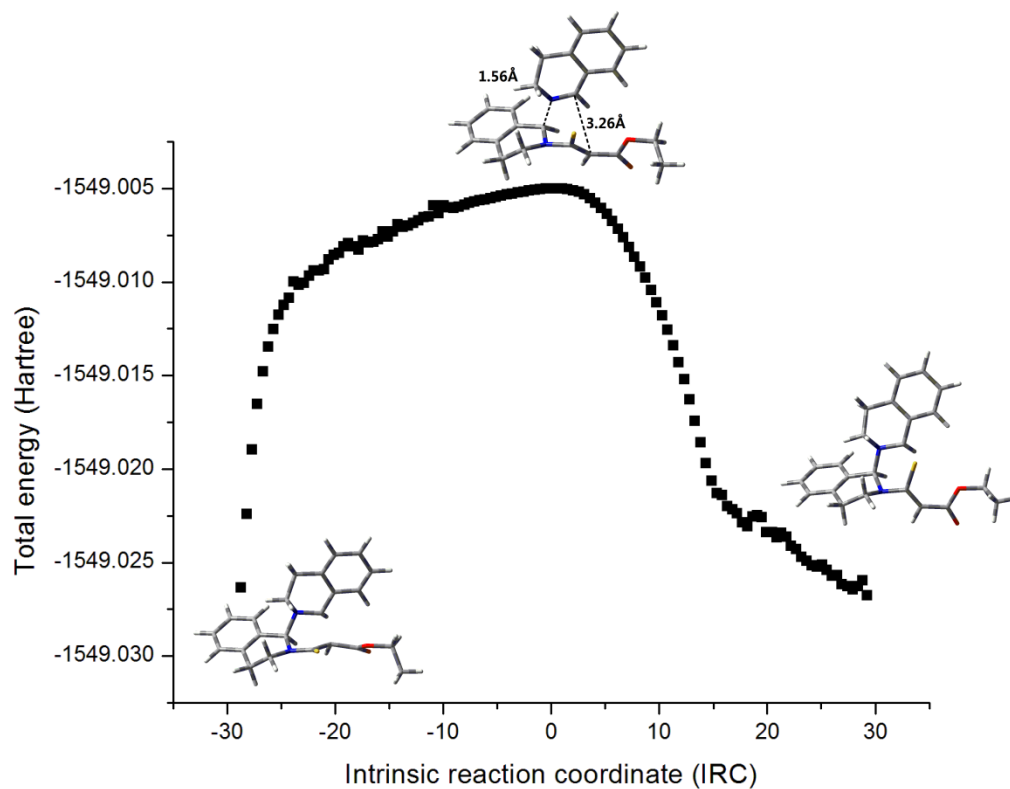

Figure SI-14. The IRC analysis of **TS2-Si-m**.

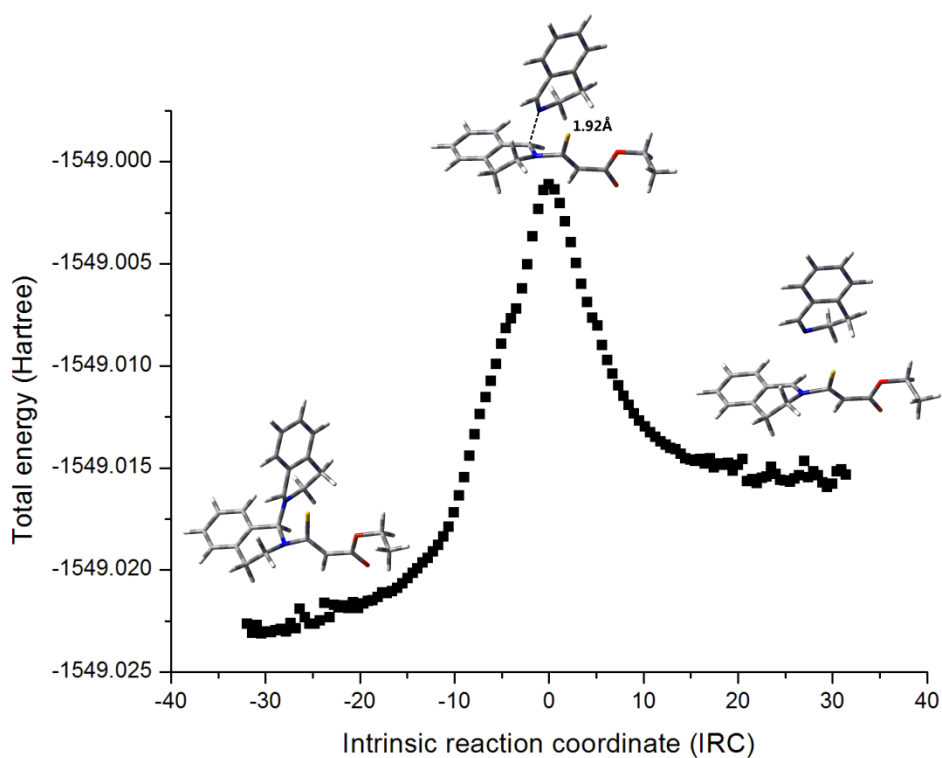

Figure SI-15. The IRC analysis of **TS1-exo-m**.

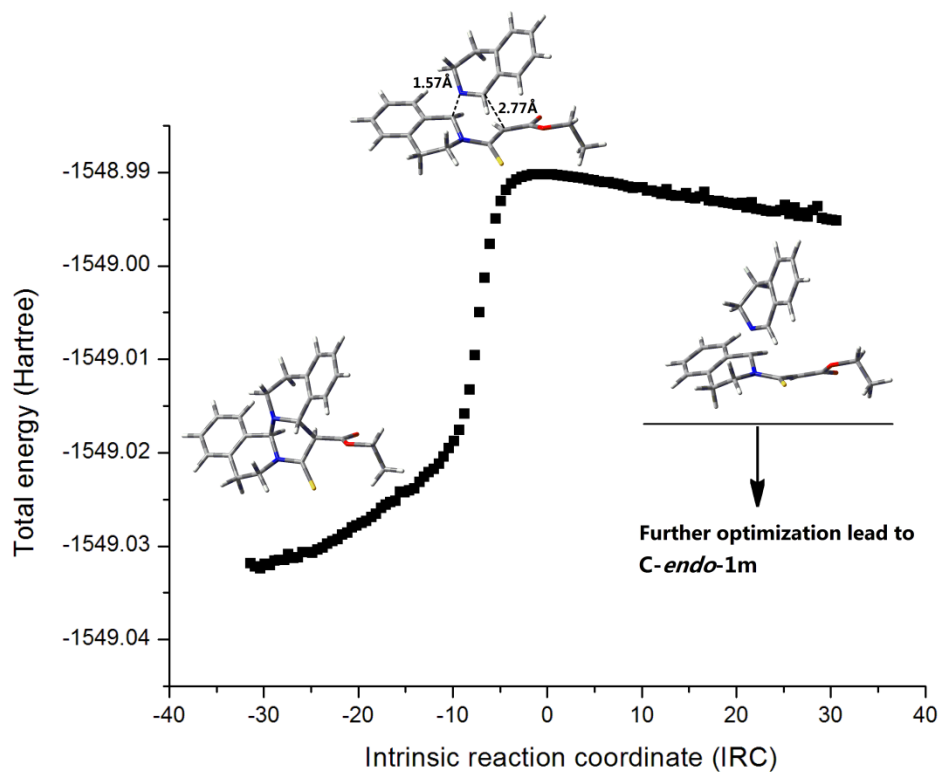

Figure SI-16. The IRC analysis of **TS2-*Re-m***.

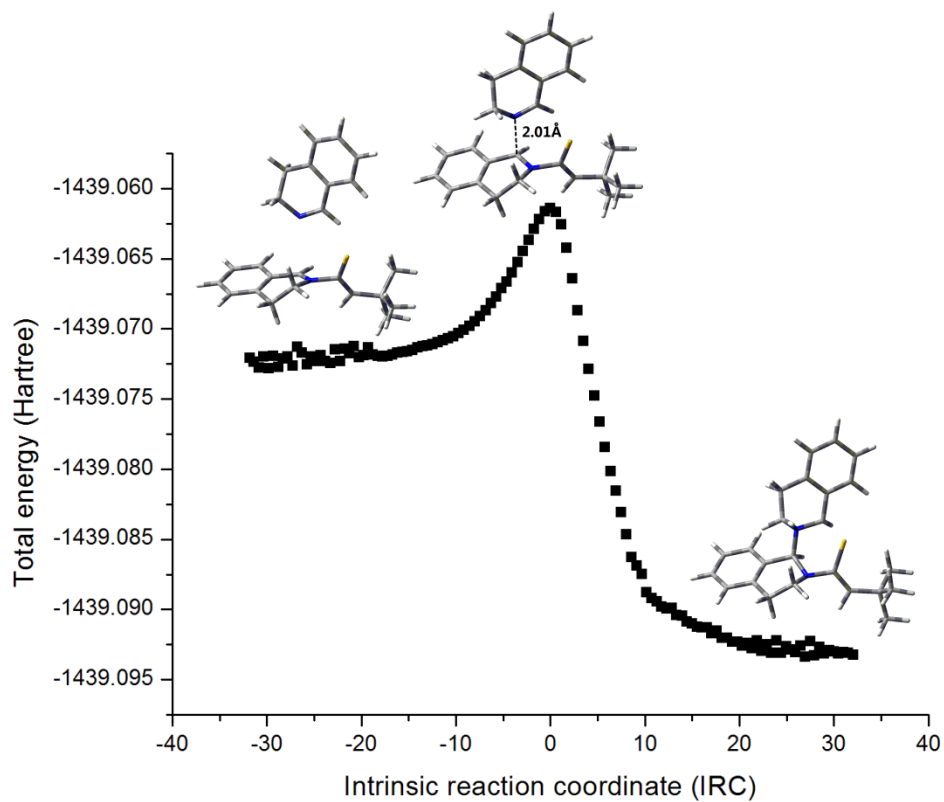

Figure SI-17. The IRC analysis of **TS1-*endo-n***.

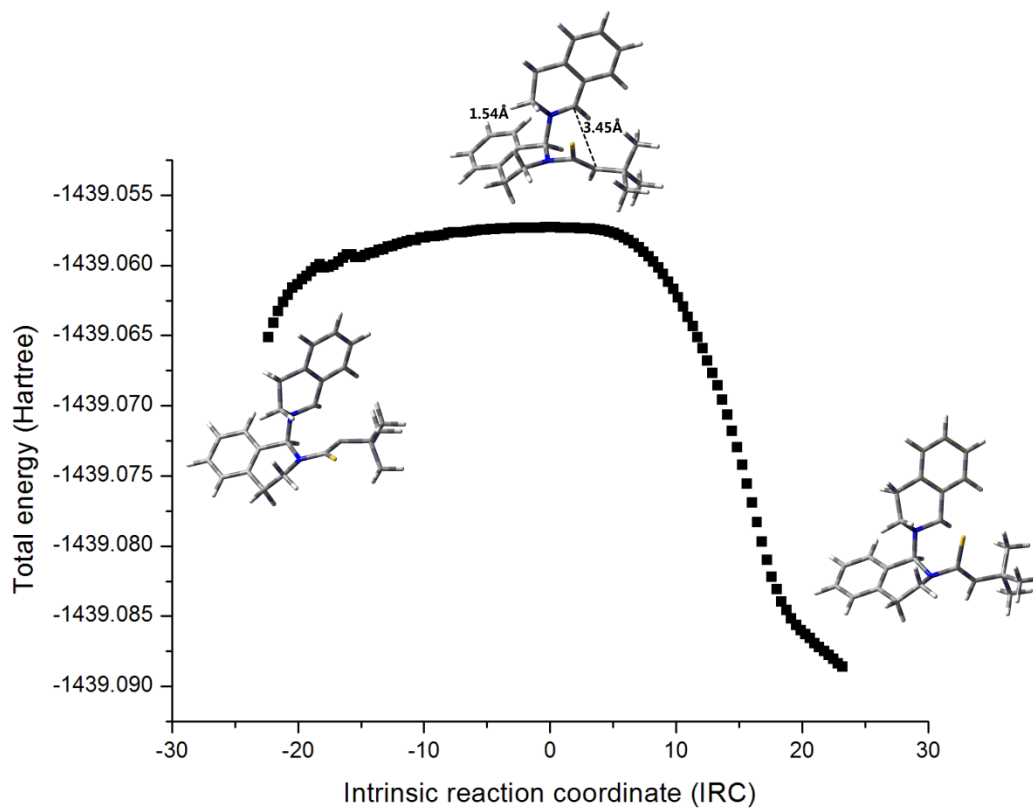

Figure SI-18. The IRC analysis of **TS2-Si-n**.

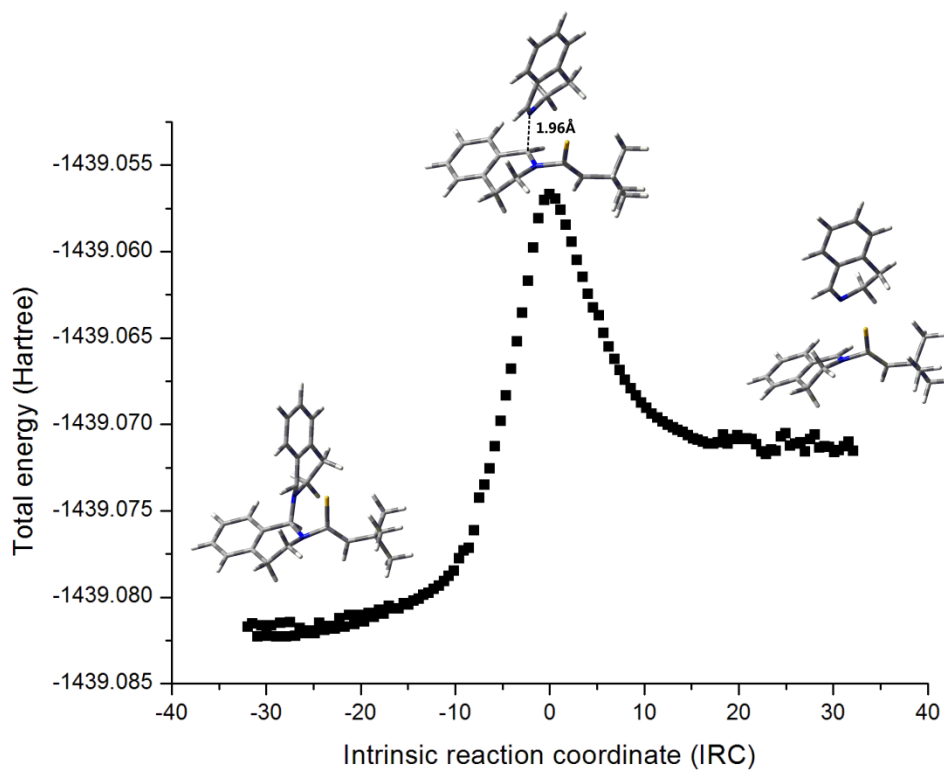

Figure SI-19. The IRC analysis of **TS1-exo-n**.

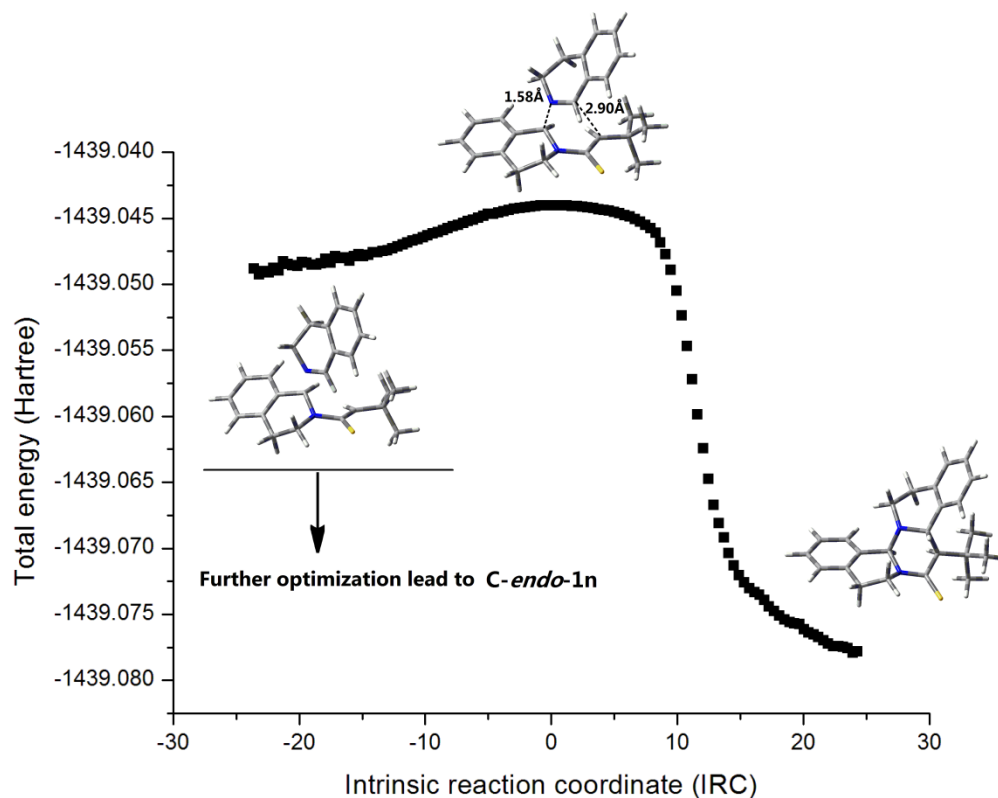

Figure SI-20. The IRC analysis of **TS2-*Re-n***.

#### 4. Coordinates of all stationary points

The structures of all stationary points are optimized at b3lyp/6-31g(d) level in gas phase.

imine **5**

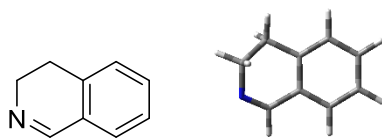

| Center Number | Atomic Number | Atomic Type | Coordinates (Angstroms) |           |           |
|---------------|---------------|-------------|-------------------------|-----------|-----------|
|               |               |             | X                       | Y         | Z         |
| 1             | 6             | 0           | -1.294275               | 1.389329  | 0.003908  |
| 2             | 6             | 0           | -0.079795               | 0.699831  | -0.089044 |
| 3             | 6             | 0           | -0.064351               | -0.708373 | -0.102980 |
| 4             | 6             | 0           | -1.270009               | -1.402292 | -0.011081 |
| 5             | 6             | 0           | -2.480391               | -0.709960 | 0.092717  |
| 6             | 6             | 0           | -2.494960               | 0.686720  | 0.097911  |
| 7             | 1             | 0           | -1.292489               | 2.477330  | 0.010141  |

|    |   |   |           |           |           |
|----|---|---|-----------|-----------|-----------|
| 8  | 1 | 0 | -1.265890 | -2.490106 | -0.021347 |
| 9  | 1 | 0 | -3.413010 | -1.262987 | 0.167748  |
| 10 | 1 | 0 | -3.436693 | 1.223153  | 0.174402  |
| 11 | 6 | 0 | 1.281506  | -1.373904 | -0.279675 |
| 12 | 1 | 0 | 1.491376  | -1.474481 | -1.355948 |
| 13 | 1 | 0 | 1.278225  | -2.389266 | 0.133866  |
| 14 | 6 | 0 | 1.209959  | 1.409703  | -0.162252 |
| 15 | 1 | 0 | 1.172636  | 2.483769  | -0.372250 |
| 16 | 7 | 0 | 2.363671  | 0.892633  | 0.030416  |
| 17 | 6 | 0 | 2.394046  | -0.537054 | 0.367499  |
| 18 | 1 | 0 | 3.376111  | -0.929606 | 0.083772  |
| 19 | 1 | 0 | 2.333655  | -0.610234 | 1.464689  |

---

**1c**

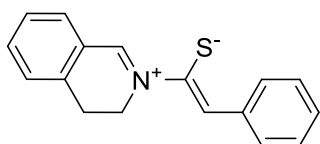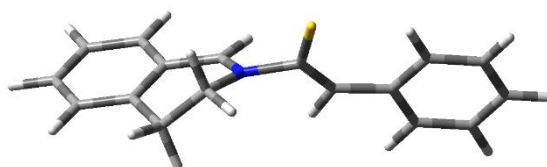

| Center Number | Atomic Number | Atomic Type | Coordinates (Angstroms) |           |           |
|---------------|---------------|-------------|-------------------------|-----------|-----------|
|               |               |             | X                       | Y         | Z         |
| 1             | 6             | 0           | -3.396335               | -1.507593 | -1.175368 |
| 2             | 6             | 0           | -2.723032               | -0.574132 | -0.367004 |
| 3             | 6             | 0           | -3.424838               | 0.145353  | 0.627302  |
| 4             | 6             | 0           | -4.791668               | -0.069760 | 0.778224  |
| 5             | 6             | 0           | -5.459188               | -0.989793 | -0.036757 |
| 6             | 6             | 0           | -4.762019               | -1.711181 | -1.011362 |
| 7             | 1             | 0           | -2.844567               | -2.057251 | -1.933675 |
| 8             | 1             | 0           | -5.340969               | 0.479682  | 1.538631  |
| 9             | 1             | 0           | -6.526512               | -1.145944 | 0.091773  |
| 10            | 1             | 0           | -5.284592               | -2.426095 | -1.639608 |
| 11            | 6             | 0           | -2.615986               | 1.071156  | 1.505393  |
| 12            | 1             | 0           | -2.222045               | 0.507289  | 2.364063  |
| 13            | 1             | 0           | -3.242041               | 1.871040  | 1.914814  |
| 14            | 6             | 0           | -1.305279               | -0.350261 | -0.527006 |
| 15            | 1             | 0           | -0.710789               | -1.009221 | -1.150633 |
| 16            | 7             | 0           | -0.669787               | 0.644419  | 0.038923  |
| 17            | 6             | 0           | -1.459206               | 1.700327  | 0.729510  |
| 18            | 1             | 0           | -0.767124               | 2.245400  | 1.370716  |
| 19            | 1             | 0           | -1.820382               | 2.395420  | -0.033432 |
| 20            | 6             | 0           | 0.770796                | 0.846262  | -0.166314 |



|    |    |   |          |           |           |
|----|----|---|----------|-----------|-----------|
| 21 | 16 | 0 | 1.150552 | 2.393946  | -0.784111 |
| 22 | 6  | 0 | 1.506015 | -0.256399 | 0.204504  |
| 23 | 1  | 0 | 0.948861 | -1.074243 | 0.658807  |
| 24 | 6  | 0 | 2.940230 | -0.478859 | 0.149905  |
| 25 | 6  | 0 | 3.444293 | -1.666305 | 0.730498  |
| 26 | 6  | 0 | 3.868247 | 0.403888  | -0.447267 |
| 27 | 6  | 0 | 4.802661 | -1.959730 | 0.722822  |
| 28 | 1  | 0 | 2.747693 | -2.361854 | 1.195065  |
| 29 | 6  | 0 | 5.228829 | 0.105374  | -0.448104 |
| 30 | 1  | 0 | 3.505892 | 1.317670  | -0.902055 |
| 31 | 6  | 0 | 5.707047 | -1.071546 | 0.132622  |
| 32 | 1  | 0 | 5.158739 | -2.880763 | 1.177904  |
| 33 | 1  | 0 | 5.923766 | 0.800800  | -0.912569 |
| 34 | 1  | 0 | 6.770339 | -1.296815 | 0.123925  |

---

**TS1-endo-c**

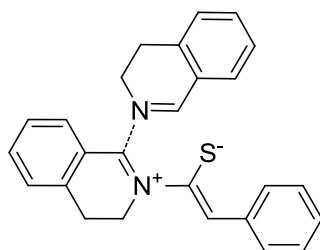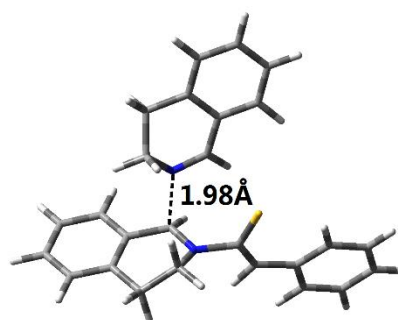

| Center Number | Atomic Number | Atomic Type | Coordinates (Angstroms) |           |           |
|---------------|---------------|-------------|-------------------------|-----------|-----------|
|               |               |             | X                       | Y         | Z         |
| 1             | 6             | 0           | 4.314135                | -0.072173 | 0.301871  |
| 2             | 6             | 0           | 3.625402                | -1.209971 | -0.172232 |
| 3             | 6             | 0           | 4.352491                | -2.126110 | -0.965265 |
| 4             | 6             | 0           | 5.692501                | -1.920659 | -1.277077 |
| 5             | 6             | 0           | 6.356425                | -0.786187 | -0.802939 |
| 6             | 6             | 0           | 5.656804                | 0.129307  | -0.013691 |
| 7             | 1             | 0           | 3.783761                | 0.640914  | 0.921622  |
| 8             | 1             | 0           | 3.845885                | -3.013771 | -1.340015 |
| 9             | 1             | 0           | 6.220625                | -2.647043 | -1.890525 |
| 10            | 1             | 0           | 7.403900                | -0.621305 | -1.042437 |
| 11            | 1             | 0           | 6.163581                | 1.013363  | 0.367020  |
| 12            | 6             | 0           | 2.221494                | -1.511348 | 0.093008  |
| 13            | 6             | 0           | 1.265829                | -0.807363 | 0.765911  |
| 14            | 16            | 0           | 1.289089                | 0.698694  | 1.623141  |
| 15            | 7             | 0           | -0.069718               | -1.430750 | 0.707634  |

|    |   |   |           |           |           |
|----|---|---|-----------|-----------|-----------|
| 16 | 6 | 0 | -0.820692 | -1.276885 | -0.390094 |
| 17 | 6 | 0 | -0.744172 | -1.772727 | 1.972375  |
| 18 | 6 | 0 | -2.090215 | -2.036478 | -0.501584 |
| 19 | 6 | 0 | -1.604880 | -3.018564 | 1.764156  |
| 20 | 1 | 0 | 0.033246  | -1.943266 | 2.717535  |
| 21 | 1 | 0 | -1.348564 | -0.925673 | 2.318670  |
| 22 | 6 | 0 | -2.863160 | -1.941534 | -1.667270 |
| 23 | 6 | 0 | -2.489526 | -2.887113 | 0.543953  |
| 24 | 1 | 0 | -0.949977 | -3.893430 | 1.640896  |
| 25 | 1 | 0 | -2.210176 | -3.201991 | 2.659577  |
| 26 | 6 | 0 | -4.033330 | -2.682891 | -1.798872 |
| 27 | 1 | 0 | -2.543276 | -1.272239 | -2.461855 |
| 28 | 6 | 0 | -3.669044 | -3.625212 | 0.399498  |
| 29 | 6 | 0 | -4.437783 | -3.526099 | -0.759255 |
| 30 | 1 | 0 | -4.627842 | -2.605672 | -2.704638 |
| 31 | 1 | 0 | -3.984158 | -4.284987 | 1.204545  |
| 32 | 1 | 0 | -5.352053 | -4.105777 | -0.852817 |
| 33 | 1 | 0 | 1.890145  | -2.463692 | -0.321280 |
| 34 | 1 | 0 | -0.248332 | -1.140740 | -1.302442 |
| 35 | 7 | 0 | -1.444763 | 0.594845  | -0.485427 |
| 36 | 6 | 0 | -0.489472 | 1.459751  | -0.624261 |
| 37 | 6 | 0 | -2.655132 | 1.033176  | 0.215492  |
| 38 | 6 | 0 | -0.654157 | 2.894952  | -0.381307 |
| 39 | 1 | 0 | 0.438987  | 1.118189  | -1.074582 |
| 40 | 6 | 0 | -3.106415 | 2.418193  | -0.258871 |
| 41 | 1 | 0 | -3.439309 | 0.289219  | 0.053125  |
| 42 | 1 | 0 | -2.430254 | 1.062545  | 1.293076  |
| 43 | 6 | 0 | 0.448896  | 3.760314  | -0.386157 |
| 44 | 6 | 0 | -1.956804 | 3.399910  | -0.200439 |
| 45 | 1 | 0 | -3.479178 | 2.345393  | -1.292001 |
| 46 | 1 | 0 | -3.946511 | 2.762196  | 0.355314  |
| 47 | 6 | 0 | 0.260834  | 5.126452  | -0.202590 |
| 48 | 1 | 0 | 1.446461  | 3.345579  | -0.499419 |
| 49 | 6 | 0 | -2.131613 | 4.772342  | -0.022061 |
| 50 | 6 | 0 | -1.030612 | 5.631545  | -0.020293 |
| 51 | 1 | 0 | 1.115436  | 5.796642  | -0.194631 |
| 52 | 1 | 0 | -3.133051 | 5.172323  | 0.119698  |
| 53 | 1 | 0 | -1.180219 | 6.697685  | 0.127824  |

---

**C-endo-c**

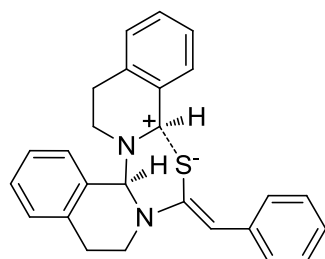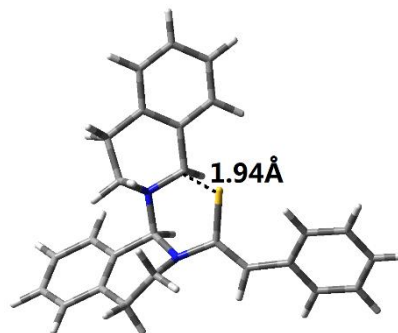

| Center Number | Atomic Number | Atomic Type | Coordinates (Angstroms) |           |           |
|---------------|---------------|-------------|-------------------------|-----------|-----------|
|               |               |             | X                       | Y         | Z         |
| 1             | 6             | 0           | 4.330406                | -0.085757 | 0.551561  |
| 2             | 6             | 0           | 3.757842                | -1.204342 | -0.084982 |
| 3             | 6             | 0           | 4.620259                | -2.061205 | -0.800693 |
| 4             | 6             | 0           | 5.982085                | -1.797540 | -0.909406 |
| 5             | 6             | 0           | 6.527818                | -0.671409 | -0.288554 |
| 6             | 6             | 0           | 5.695613                | 0.176058  | 0.444354  |
| 7             | 1             | 0           | 3.712463                | 0.572681  | 1.149620  |
| 8             | 1             | 0           | 4.203437                | -2.941248 | -1.285339 |
| 9             | 1             | 0           | 6.618940                | -2.473026 | -1.474793 |
| 10            | 1             | 0           | 7.591734                | -0.463702 | -0.365856 |
| 11            | 1             | 0           | 6.111987                | 1.044964  | 0.947572  |
| 12            | 6             | 0           | 2.338450                | -1.568227 | -0.040271 |
| 13            | 6             | 0           | 1.218087                | -0.847560 | 0.198626  |
| 14            | 16            | 0           | 1.193727                | 0.915511  | 0.565691  |
| 15            | 7             | 0           | -0.028778               | -1.542477 | 0.225831  |
| 16            | 6             | 0           | -1.111603               | -0.949783 | -0.561217 |
| 17            | 6             | 0           | -0.419812               | -2.128271 | 1.516197  |
| 18            | 6             | 0           | -2.366247               | -1.811440 | -0.528878 |
| 19            | 6             | 0           | -1.359281               | -3.303295 | 1.252571  |
| 20            | 1             | 0           | 0.490776                | -2.474268 | 2.011287  |
| 21            | 1             | 0           | -0.896020               | -1.396476 | 2.188019  |
| 22            | 6             | 0           | -3.418870               | -1.480560 | -1.394005 |
| 23            | 6             | 0           | -2.490286               | -2.917759 | 0.324602  |
| 24            | 1             | 0           | -0.779522               | -4.119493 | 0.799136  |
| 25            | 1             | 0           | -1.760185               | -3.685546 | 2.199944  |
| 26            | 6             | 0           | -4.585793               | -2.238004 | -1.422535 |
| 27            | 1             | 0           | -3.312872               | -0.612478 | -2.039064 |
| 28            | 6             | 0           | -3.673156               | -3.670683 | 0.290214  |
| 29            | 6             | 0           | -4.713538               | -3.341055 | -0.573426 |
| 30            | 1             | 0           | -5.391374               | -1.971200 | -2.101226 |
| 31            | 1             | 0           | -3.772760               | -4.525567 | 0.955876  |

|    |   |   |           |           |           |
|----|---|---|-----------|-----------|-----------|
| 32 | 1 | 0 | -5.621598 | -3.938181 | -0.583459 |
| 33 | 1 | 0 | 2.139025  | -2.616895 | -0.258887 |
| 34 | 1 | 0 | -0.741537 | -0.928463 | -1.595702 |
| 35 | 7 | 0 | -1.444897 | 0.464508  | -0.276225 |
| 36 | 6 | 0 | -0.342916 | 1.334212  | -0.533372 |
| 37 | 6 | 0 | -2.156672 | 0.791811  | 0.964027  |
| 38 | 6 | 0 | -0.657354 | 2.797830  | -0.338884 |
| 39 | 1 | 0 | 0.019060  | 1.154625  | -1.550264 |
| 40 | 6 | 0 | -2.822985 | 2.157913  | 0.797297  |
| 41 | 1 | 0 | -2.909290 | 0.022315  | 1.147174  |
| 42 | 1 | 0 | -1.471216 | 0.814306  | 1.826402  |
| 43 | 6 | 0 | 0.238049  | 3.764842  | -0.816169 |
| 44 | 6 | 0 | -1.839196 | 3.197634  | 0.304922  |
| 45 | 1 | 0 | -3.648952 | 2.063305  | 0.078524  |
| 46 | 1 | 0 | -3.265232 | 2.476231  | 1.749758  |
| 47 | 6 | 0 | -0.030475 | 5.121609  | -0.659863 |
| 48 | 1 | 0 | 1.152795  | 3.444011  | -1.308735 |
| 49 | 6 | 0 | -2.097203 | 4.566022  | 0.456368  |
| 50 | 6 | 0 | -1.204939 | 5.524149  | -0.018539 |
| 51 | 1 | 0 | 0.671108  | 5.861070  | -1.035976 |
| 52 | 1 | 0 | -3.011600 | 4.878579  | 0.956449  |
| 53 | 1 | 0 | -1.422792 | 6.580923  | 0.111564  |

**TS2-Si-c**

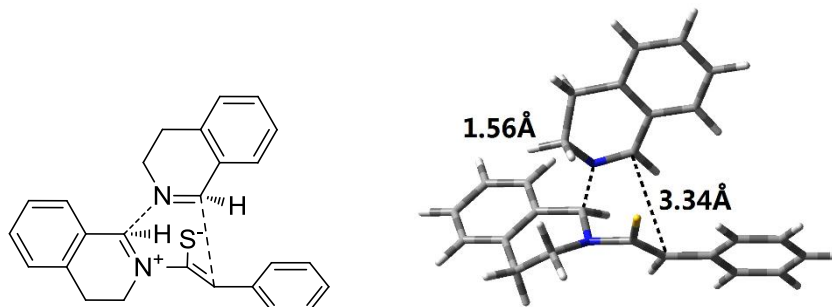

| Center Number | Atomic Number | Atomic Type | Coordinates (Angstroms) |           |           |
|---------------|---------------|-------------|-------------------------|-----------|-----------|
|               |               |             | X                       | Y         | Z         |
| 1             | 6             | 0           | 3.594999                | -1.522207 | 0.523829  |
| 2             | 6             | 0           | 2.577130                | -2.181305 | -0.206048 |
| 3             | 6             | 0           | 2.986544                | -2.987026 | -1.296586 |
| 4             | 6             | 0           | 4.325248                | -3.126274 | -1.645312 |
| 5             | 6             | 0           | 5.315470                | -2.460226 | -0.916465 |
| 6             | 6             | 0           | 4.935308                | -1.663107 | 0.165678  |
| 7             | 1             | 0           | 3.313026                | -0.915033 | 1.375927  |

|    |    |   |            |            |            |
|----|----|---|------------|------------|------------|
| 8  | 1  | 0 | 2. 226851  | -3. 512312 | -1. 873315 |
| 9  | 1  | 0 | 4. 598672  | -3. 757342 | -2. 488231 |
| 10 | 1  | 0 | 6. 363666  | -2. 567704 | -1. 184013 |
| 11 | 1  | 0 | 5. 694817  | -1. 147346 | 0. 749895  |
| 12 | 6  | 0 | 1. 149517  | -2. 076017 | 0. 059841  |
| 13 | 6  | 0 | 0. 446917  | -1. 342195 | 0. 987156  |
| 14 | 16 | 0 | 0. 992561  | -0. 335357 | 2. 290647  |
| 15 | 7  | 0 | -0. 998033 | -1. 364635 | 0. 753642  |
| 16 | 6  | 0 | -1. 434935 | -0. 654317 | -0. 395044 |
| 17 | 6  | 0 | -1. 904412 | -1. 412800 | 1. 905483  |
| 18 | 6  | 0 | -2. 930883 | -0. 671868 | -0. 631653 |
| 19 | 6  | 0 | -3. 224897 | -2. 043387 | 1. 463448  |
| 20 | 1  | 0 | -1. 416896 | -2. 018630 | 2. 669847  |
| 21 | 1  | 0 | -2. 078189 | -0. 425932 | 2. 356207  |
| 22 | 6  | 0 | -3. 447274 | -0. 042124 | -1. 772749 |
| 23 | 6  | 0 | -3. 791556 | -1. 343115 | 0. 249861  |
| 24 | 1  | 0 | -3. 051759 | -3. 101977 | 1. 224434  |
| 25 | 1  | 0 | -3. 948821 | -2. 016465 | 2. 287197  |
| 26 | 6  | 0 | -4. 812624 | -0. 066755 | -2. 041830 |
| 27 | 1  | 0 | -2. 770492 | 0. 470695  | -2. 452765 |
| 28 | 6  | 0 | -5. 164350 | -1. 360090 | -0. 032654 |
| 29 | 6  | 0 | -5. 675255 | -0. 729885 | -1. 164427 |
| 30 | 1  | 0 | -5. 201763 | 0. 423449  | -2. 929761 |
| 31 | 1  | 0 | -5. 835947 | -1. 875407 | 0. 650175  |
| 32 | 1  | 0 | -6. 743271 | -0. 754101 | -1. 363369 |
| 33 | 1  | 0 | 0. 534298  | -2. 682481 | -0. 606833 |
| 34 | 1  | 0 | -0. 914896 | -1. 031096 | -1. 280767 |
| 35 | 7  | 0 | -0. 930712 | 0. 819759  | -0. 347199 |
| 36 | 6  | 0 | 0. 288667  | 1. 050050  | -0. 754297 |
| 37 | 6  | 0 | -1. 522479 | 1. 755995  | 0. 633264  |
| 38 | 6  | 0 | 0. 994612  | 2. 280816  | -0. 490242 |
| 39 | 1  | 0 | 0. 772800  | 0. 267716  | -1. 330822 |
| 40 | 6  | 0 | -1. 203898 | 3. 203396  | 0. 259566  |
| 41 | 1  | 0 | -2. 598277 | 1. 579674  | 0. 659555  |
| 42 | 1  | 0 | -1. 074960 | 1. 491220  | 1. 604003  |
| 43 | 6  | 0 | 2. 368336  | 2. 378749  | -0. 766382 |
| 44 | 6  | 0 | 0. 278819  | 3. 383934  | 0. 022704  |
| 45 | 1  | 0 | -1. 762664 | 3. 490335  | -0. 644233 |
| 46 | 1  | 0 | -1. 550644 | 3. 858471  | 1. 065625  |
| 47 | 6  | 0 | 3. 033736  | 3. 576360  | -0. 527029 |
| 48 | 1  | 0 | 2. 906464  | 1. 507201  | -1. 129019 |
| 49 | 6  | 0 | 0. 956674  | 4. 578611  | 0. 242645  |
| 50 | 6  | 0 | 2. 326293  | 4. 673668  | -0. 027689 |
| 51 | 1  | 0 | 4. 098763  | 3. 655058  | -0. 721655 |

|    |   |   |          |          |          |
|----|---|---|----------|----------|----------|
| 52 | 1 | 0 | 0.420579 | 5.438663 | 0.635873 |
| 53 | 1 | 0 | 2.844634 | 5.609898 | 0.160196 |

**7c**

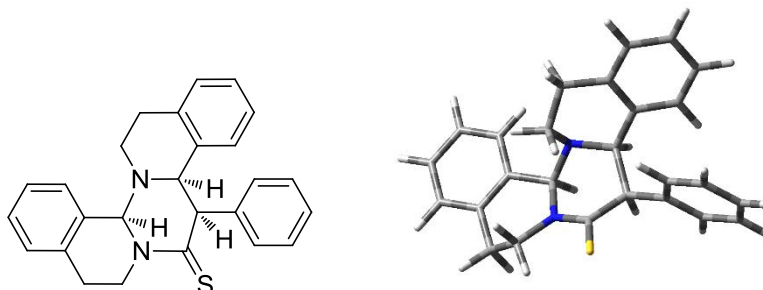

| Center Number | Atomic Number | Atomic Type | Coordinates (Angstroms) |           |           |
|---------------|---------------|-------------|-------------------------|-----------|-----------|
|               |               |             | X                       | Y         | Z         |
| 1             | 6             | 0           | 3.032836                | -0.938559 | 0.680147  |
| 2             | 6             | 0           | 2.330001                | -1.260968 | -0.489946 |
| 3             | 6             | 0           | 3.030140                | -1.869066 | -1.537994 |
| 4             | 6             | 0           | 4.394458                | -2.150311 | -1.429672 |
| 5             | 6             | 0           | 5.079411                | -1.825197 | -0.260501 |
| 6             | 6             | 0           | 4.391661                | -1.218969 | 0.794443  |
| 7             | 1             | 0           | 2.512441                | -0.467871 | 1.507475  |
| 8             | 1             | 0           | 2.500796                | -2.135959 | -2.450875 |
| 9             | 1             | 0           | 4.915007                | -2.626382 | -2.256606 |
| 10            | 1             | 0           | 6.140250                | -2.043093 | -0.168177 |
| 11            | 1             | 0           | 4.916468                | -0.964221 | 1.711360  |
| 12            | 6             | 0           | 0.859188                | -0.946537 | -0.669589 |
| 13            | 6             | 0           | -0.088812               | -1.717541 | 0.277605  |
| 14            | 16            | 0           | 0.441587                | -2.893718 | 1.342884  |
| 15            | 7             | 0           | -1.404933               | -1.425178 | 0.096296  |
| 16            | 6             | 0           | -1.751830               | -0.167050 | -0.635196 |
| 17            | 6             | 0           | -2.444851               | -2.165078 | 0.821279  |
| 18            | 6             | 0           | -3.216648               | 0.231659  | -0.499935 |
| 19            | 6             | 0           | -3.764174               | -2.141418 | 0.053243  |
| 20            | 1             | 0           | -2.081545               | -3.184796 | 0.954369  |
| 21            | 1             | 0           | -2.575226               | -1.738427 | 1.825886  |
| 22            | 6             | 0           | -3.590546               | 1.556083  | -0.760641 |
| 23            | 6             | 0           | -4.201027               | -0.725815 | -0.219153 |
| 24            | 1             | 0           | -3.641718               | -2.696430 | -0.888471 |
| 25            | 1             | 0           | -4.523603               | -2.675751 | 0.635094  |
| 26            | 6             | 0           | -4.932293               | 1.931059  | -0.727195 |
| 27            | 1             | 0           | -2.817063               | 2.283861  | -0.983026 |

|    |   |   |           |           |           |
|----|---|---|-----------|-----------|-----------|
| 28 | 6 | 0 | -5.544950 | -0.337831 | -0.182709 |
| 29 | 6 | 0 | -5.914228 | 0.981579  | -0.436447 |
| 30 | 1 | 0 | -5.209847 | 2.962551  | -0.926304 |
| 31 | 1 | 0 | -6.304583 | -1.080687 | 0.050177  |
| 32 | 1 | 0 | -6.961836 | 1.268556  | -0.403988 |
| 33 | 1 | 0 | 0.584080  | -1.354236 | -1.652352 |
| 34 | 1 | 0 | -1.566855 | -0.352729 | -1.704512 |
| 35 | 7 | 0 | -0.843874 | 0.898113  | -0.254588 |
| 36 | 6 | 0 | 0.481487  | 0.626552  | -0.814683 |
| 37 | 6 | 0 | -0.814870 | 1.170595  | 1.191596  |
| 38 | 6 | 0 | 1.503501  | 1.653798  | -0.346731 |
| 39 | 1 | 0 | 0.386335  | 0.774720  | -1.897509 |
| 40 | 6 | 0 | -0.093146 | 2.489528  | 1.433003  |
| 41 | 1 | 0 | -1.847207 | 1.227598  | 1.547779  |
| 42 | 1 | 0 | -0.316143 | 0.364810  | 1.755107  |
| 43 | 6 | 0 | 2.708316  | 1.789255  | -1.054123 |
| 44 | 6 | 0 | 1.237537  | 2.532217  | 0.715939  |
| 45 | 1 | 0 | -0.724413 | 3.314580  | 1.074267  |
| 46 | 1 | 0 | 0.046416  | 2.644373  | 2.510280  |
| 47 | 6 | 0 | 3.651306  | 2.747239  | -0.697490 |
| 48 | 1 | 0 | 2.912397  | 1.125545  | -1.889240 |
| 49 | 6 | 0 | 2.197753  | 3.489679  | 1.072987  |
| 50 | 6 | 0 | 3.399088  | 3.599421  | 0.380590  |
| 51 | 1 | 0 | 4.578968  | 2.827817  | -1.257231 |
| 52 | 1 | 0 | 1.986498  | 4.161088  | 1.902872  |
| 53 | 1 | 0 | 4.130791  | 4.348102  | 0.672563  |

4c

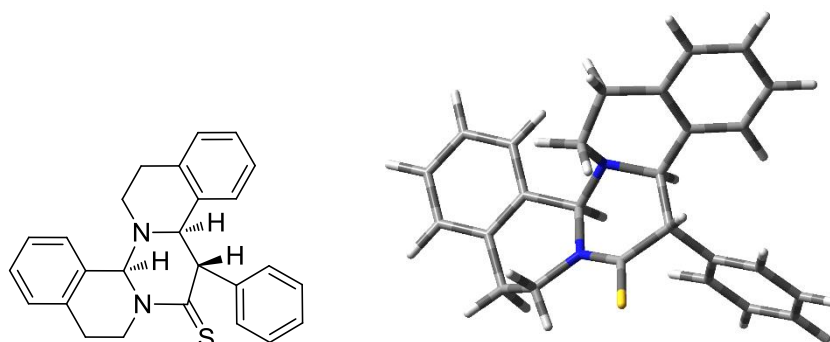

| Center Number | Atomic Number | Atomic Type | Coordinates (Angstroms) |          |          |
|---------------|---------------|-------------|-------------------------|----------|----------|
|               |               |             | X                       | Y        | Z        |
| 1             | 6             | 0           | -1.232789               | 0.543015 | 0.497750 |
| 2             | 6             | 0           | -0.071654               | 1.277263 | 1.200198 |

|    |    |   |           |           |           |
|----|----|---|-----------|-----------|-----------|
| 3  | 16 | 0 | -0.417719 | 2.153820  | 2.587212  |
| 4  | 7  | 0 | 1.166038  | 1.178372  | 0.664159  |
| 5  | 6  | 0 | 1.430575  | 0.151632  | -0.409819 |
| 6  | 6  | 0 | 2.283447  | 1.917536  | 1.269413  |
| 7  | 6  | 0 | 2.911204  | -0.169071 | -0.577634 |
| 8  | 6  | 0 | 3.420792  | 2.118728  | 0.270972  |
| 9  | 1  | 0 | 1.890037  | 2.873866  | 1.617923  |
| 10 | 1  | 0 | 2.640590  | 1.377663  | 2.157016  |
| 11 | 6  | 0 | 3.299079  | -1.394570 | -1.133176 |
| 12 | 6  | 0 | 3.882071  | 0.801058  | -0.292402 |
| 13 | 1  | 0 | 3.078571  | 2.782857  | -0.536649 |
| 14 | 1  | 0 | 4.244209  | 2.637803  | 0.773831  |
| 15 | 6  | 0 | 4.644924  | -1.666283 | -1.374558 |
| 16 | 1  | 0 | 2.535350  | -2.126114 | -1.375639 |
| 17 | 6  | 0 | 5.230418  | 0.517010  | -0.532486 |
| 18 | 6  | 0 | 5.615431  | -0.709917 | -1.069959 |
| 19 | 1  | 0 | 4.934050  | -2.623336 | -1.800098 |
| 20 | 1  | 0 | 5.980758  | 1.267801  | -0.295175 |
| 21 | 1  | 0 | 6.666410  | -0.918323 | -1.251091 |
| 22 | 1  | 0 | 1.093829  | 0.596073  | -1.358119 |
| 23 | 7  | 0 | 0.614357  | -1.023072 | -0.218644 |
| 24 | 6  | 0 | -0.791097 | -0.666263 | -0.427240 |
| 25 | 6  | 0 | 0.827664  | -1.758726 | 1.037889  |
| 26 | 6  | 0 | -1.704796 | -1.867831 | -0.249792 |
| 27 | 1  | 0 | -0.868807 | -0.333332 | -1.468981 |
| 28 | 6  | 0 | 0.161562  | -3.127717 | 0.914950  |
| 29 | 1  | 0 | 1.903072  | -1.871710 | 1.196435  |
| 30 | 1  | 0 | 0.425045  | -1.218353 | 1.910441  |
| 31 | 6  | 0 | -3.015207 | -1.815498 | -0.746726 |
| 32 | 6  | 0 | -1.264760 | -3.023497 | 0.415827  |
| 33 | 1  | 0 | 0.744883  | -3.744238 | 0.216568  |
| 34 | 1  | 0 | 0.188161  | -3.640481 | 1.884535  |
| 35 | 6  | 0 | -3.887945 | -2.887602 | -0.578594 |
| 36 | 1  | 0 | -3.351300 | -0.924286 | -1.269623 |
| 37 | 6  | 0 | -2.153164 | -4.094632 | 0.580588  |
| 38 | 6  | 0 | -3.455600 | -4.033873 | 0.092304  |
| 39 | 1  | 0 | -4.899262 | -2.829969 | -0.971932 |
| 40 | 1  | 0 | -1.811205 | -4.988019 | 1.099380  |
| 41 | 1  | 0 | -4.129071 | -4.875308 | 0.231846  |
| 42 | 6  | 0 | -2.110024 | 1.542567  | -0.251061 |
| 43 | 6  | 0 | -1.616528 | 2.285761  | -1.333560 |
| 44 | 6  | 0 | -3.444477 | 1.729269  | 0.130335  |
| 45 | 6  | 0 | -2.434933 | 3.182457  | -2.019463 |
| 46 | 1  | 0 | -0.578490 | 2.176914  | -1.638548 |



|    |   |   |           |          |           |
|----|---|---|-----------|----------|-----------|
| 47 | 6 | 0 | -4.267645 | 2.623411 | -0.556424 |
| 48 | 1 | 0 | -3.838352 | 1.172372 | 0.975945  |
| 49 | 6 | 0 | -3.766456 | 3.352529 | -1.634893 |
| 50 | 1 | 0 | -2.030598 | 3.751438 | -2.852647 |
| 51 | 1 | 0 | -5.300138 | 2.752691 | -0.242641 |
| 52 | 1 | 0 | -4.405228 | 4.050923 | -2.168748 |
| 53 | 1 | 0 | -1.832317 | 0.144318 | 1.317350  |

**TS1-exo-c**

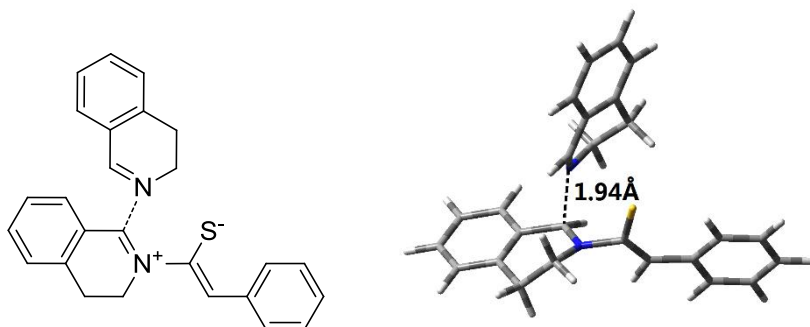

| Center Number | Atomic Number | Atomic Type | Coordinates (Angstroms) |           |           |
|---------------|---------------|-------------|-------------------------|-----------|-----------|
|               |               |             | X                       | Y         | Z         |
| 1             | 6             | 0           | -4.010172               | 0.891761  | 0.486079  |
| 2             | 6             | 0           | -3.131020               | 1.865978  | -0.035692 |
| 3             | 6             | 0           | -3.691244               | 2.877349  | -0.848535 |
| 4             | 6             | 0           | -5.052053               | 2.915793  | -1.134406 |
| 5             | 6             | 0           | -5.905814               | 1.939392  | -0.614097 |
| 6             | 6             | 0           | -5.372730               | 0.933782  | 0.195193  |
| 7             | 1             | 0           | -3.610913               | 0.111177  | 1.122702  |
| 8             | 1             | 0           | -3.036308               | 3.643442  | -1.260041 |
| 9             | 1             | 0           | -5.448126               | 3.709484  | -1.763795 |
| 10            | 1             | 0           | -6.970312               | 1.965794  | -0.832863 |
| 11            | 1             | 0           | -6.026734               | 0.171163  | 0.612257  |
| 12            | 6             | 0           | -1.691077               | 1.903785  | 0.197930  |
| 13            | 6             | 0           | -0.870662               | 1.043757  | 0.866932  |
| 14            | 16            | 0           | -1.165440               | -0.401968 | 1.778760  |
| 15            | 7             | 0           | 0.560479                | 1.378239  | 0.761502  |
| 16            | 6             | 0           | 1.202464                | 1.120289  | -0.389996 |
| 17            | 6             | 0           | 1.332348                | 1.555790  | 2.006337  |
| 18            | 6             | 0           | 2.645574                | 1.471477  | -0.493623 |
| 19            | 6             | 0           | 2.454750                | 2.561191  | 1.762395  |
| 20            | 1             | 0           | 0.632364                | 1.909184  | 2.764044  |
| 21            | 1             | 0           | 1.737478                | 0.601752  | 2.361091  |
| 22            | 6             | 0           | 3.366776                | 1.154496  | -1.653052 |

|    |   |   |           |           |           |
|----|---|---|-----------|-----------|-----------|
| 23 | 6 | 0 | 3.269156  | 2.179545  | 0.548278  |
| 24 | 1 | 0 | 2.019190  | 3.559751  | 1.612101  |
| 25 | 1 | 0 | 3.093669  | 2.624329  | 2.650771  |
| 26 | 6 | 0 | 4.701203  | 1.525217  | -1.779079 |
| 27 | 1 | 0 | 2.877908  | 0.604678  | -2.452619 |
| 28 | 6 | 0 | 4.613205  | 2.544141  | 0.411266  |
| 29 | 6 | 0 | 5.327665  | 2.220486  | -0.740112 |
| 30 | 1 | 0 | 5.253032  | 1.272332  | -2.679853 |
| 31 | 1 | 0 | 5.099797  | 3.088284  | 1.217350  |
| 32 | 1 | 0 | 6.371518  | 2.508866  | -0.828931 |
| 33 | 1 | 0 | -1.194411 | 2.767275  | -0.245786 |
| 34 | 1 | 0 | 0.599177  | 1.289968  | -1.277436 |
| 35 | 7 | 0 | 1.122527  | -0.786119 | -0.748716 |
| 36 | 6 | 0 | 1.104095  | -1.581623 | 0.276216  |
| 37 | 6 | 0 | 0.467170  | -1.223393 | -1.989270 |
| 38 | 6 | 0 | 0.599875  | -2.953741 | 0.221952  |
| 39 | 1 | 0 | 1.625919  | -1.258088 | 1.170446  |
| 40 | 6 | 0 | -0.706794 | -2.178184 | -1.742138 |
| 41 | 1 | 0 | 0.124495  | -0.332590 | -2.527313 |
| 42 | 1 | 0 | 1.229771  | -1.706318 | -2.618534 |
| 43 | 6 | 0 | 0.993899  | -3.913592 | 1.162619  |
| 44 | 6 | 0 | -0.281245 | -3.296556 | -0.822623 |
| 45 | 1 | 0 | -1.524668 | -1.621142 | -1.263725 |
| 46 | 1 | 0 | -1.080676 | -2.563540 | -2.697226 |
| 47 | 6 | 0 | 0.523097  | -5.220636 | 1.060967  |
| 48 | 1 | 0 | 1.665444  | -3.631584 | 1.969758  |
| 49 | 6 | 0 | -0.749469 | -4.604897 | -0.910687 |
| 50 | 6 | 0 | -0.346790 | -5.564898 | 0.023208  |
| 51 | 1 | 0 | 0.828156  | -5.967114 | 1.788576  |
| 52 | 1 | 0 | -1.436091 | -4.877407 | -1.708636 |
| 53 | 1 | 0 | -0.716937 | -6.583295 | -0.058373 |

---

**C-*exo-c***

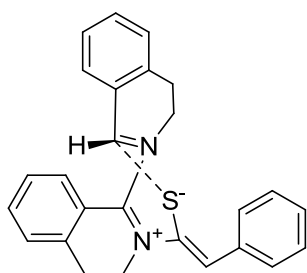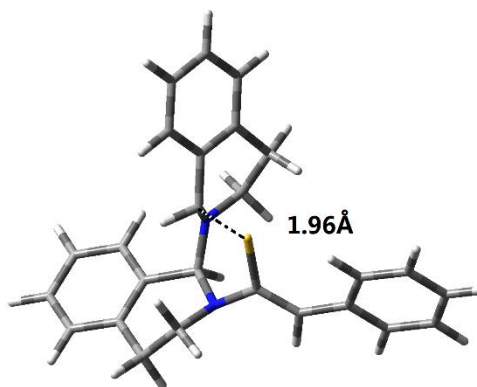

| Center<br>Number | Atomic<br>Number | Atomic<br>Type | Coordinates (Angstroms) |           |           |
|------------------|------------------|----------------|-------------------------|-----------|-----------|
|                  |                  |                | X                       | Y         | Z         |
| 1                | 6                | 0              | -4.112624               | -0.391673 | -0.724734 |
| 2                | 6                | 0              | -3.515485               | -1.406104 | 0.050220  |
| 3                | 6                | 0              | -4.352112               | -2.144987 | 0.913795  |
| 4                | 6                | 0              | -5.711041               | -1.868491 | 1.024429  |
| 5                | 6                | 0              | -6.280610               | -0.845593 | 0.262303  |
| 6                | 6                | 0              | -5.474645               | -0.115254 | -0.612309 |
| 7                | 1                | 0              | -3.516550               | 0.175506  | -1.429198 |
| 8                | 1                | 0              | -3.916336               | -2.942478 | 1.511541  |
| 9                | 1                | 0              | -6.327072               | -2.452745 | 1.703217  |
| 10               | 1                | 0              | -7.342342               | -0.627756 | 0.341851  |
| 11               | 1                | 0              | -5.909534               | 0.672199  | -1.222590 |
| 12               | 6                | 0              | -2.095582               | -1.766753 | 0.025625  |
| 13               | 6                | 0              | -0.998406               | -1.119721 | -0.429994 |
| 14               | 16               | 0              | -0.975939               | 0.474325  | -1.252677 |
| 15               | 7                | 0              | 0.277519                | -1.747600 | -0.274621 |
| 16               | 6                | 0              | 1.163996                | -1.077031 | 0.695662  |
| 17               | 6                | 0              | 0.868664                | -2.233921 | -1.528135 |
| 18               | 6                | 0              | 2.637127                | -1.455870 | 0.503376  |
| 19               | 6                | 0              | 2.007535                | -3.194215 | -1.201187 |
| 20               | 1                | 0              | 0.073572                | -2.748737 | -2.075042 |
| 21               | 1                | 0              | 1.237828                | -1.423021 | -2.179371 |
| 22               | 6                | 0              | 3.602982                | -0.776697 | 1.258564  |
| 23               | 6                | 0              | 3.039187                | -2.493330 | -0.351476 |
| 24               | 1                | 0              | 1.594570                | -4.063720 | -0.670927 |
| 25               | 1                | 0              | 2.464772                | -3.566221 | -2.126074 |
| 26               | 6                | 0              | 4.948415                | -1.125171 | 1.182289  |
| 27               | 1                | 0              | 3.291457                | 0.041174  | 1.901456  |
| 28               | 6                | 0              | 4.397169                | -2.831265 | -0.428382 |
| 29               | 6                | 0              | 5.348960                | -2.161826 | 0.335282  |
| 30               | 1                | 0              | 5.682606                | -0.586969 | 1.775798  |
| 31               | 1                | 0              | 4.704688                | -3.625948 | -1.104905 |
| 32               | 1                | 0              | 6.397704                | -2.437737 | 0.263122  |
| 33               | 1                | 0              | -1.868234               | -2.730016 | 0.479993  |
| 34               | 1                | 0              | 0.865315                | -1.431435 | 1.692255  |
| 35               | 7                | 0              | 0.984532                | 0.386078  | 0.748035  |
| 36               | 6                | 0              | 0.756889                | 1.009724  | -0.505128 |
| 37               | 6                | 0              | 0.395851                | 0.966243  | 1.966341  |
| 38               | 6                | 0              | 0.770981                | 2.509378  | -0.437630 |
| 39               | 1                | 0              | 1.487845                | 0.644091  | -1.229187 |
| 40               | 6                | 0              | -0.462301               | 2.214640  | 1.696390  |

|    |   |   |           |          |           |
|----|---|---|-----------|----------|-----------|
| 41 | 1 | 0 | -0.219971 | 0.213334 | 2.474871  |
| 42 | 1 | 0 | 1.207220  | 1.236818 | 2.658930  |
| 43 | 6 | 0 | 1.352980  | 3.286045 | -1.441380 |
| 44 | 6 | 0 | 0.181225  | 3.122449 | 0.679169  |
| 45 | 1 | 0 | -1.443796 | 1.899075 | 1.320341  |
| 46 | 1 | 0 | -0.631410 | 2.740664 | 2.642671  |
| 47 | 6 | 0 | 1.353536  | 4.678226 | -1.338309 |
| 48 | 1 | 0 | 1.810545  | 2.801400 | -2.300810 |
| 49 | 6 | 0 | 0.198230  | 4.514090 | 0.781031  |
| 50 | 6 | 0 | 0.778167  | 5.291518 | -0.224565 |
| 51 | 1 | 0 | 1.808750  | 5.279758 | -2.120253 |
| 52 | 1 | 0 | -0.248915 | 4.993137 | 1.649256  |
| 53 | 1 | 0 | 0.783431  | 6.374622 | -0.135498 |

**TS2-Re-c**

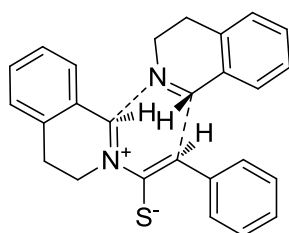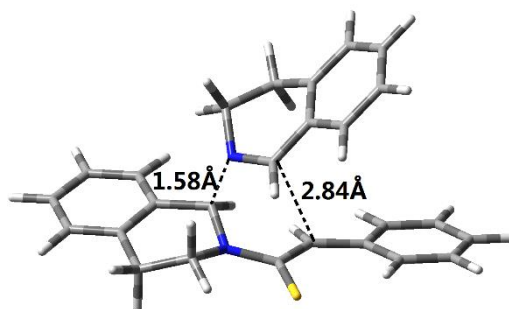

| Center Number | Atomic Number | Atomic Type | Coordinates (Angstroms) |           |           |
|---------------|---------------|-------------|-------------------------|-----------|-----------|
|               |               |             | X                       | Y         | Z         |
| 1             | 6             | 0           | -0.825347               | -1.439399 | 0.684956  |
| 2             | 6             | 0           | -0.018714               | -1.850177 | -0.382859 |
| 3             | 16            | 0           | -0.541594               | -2.793699 | -1.712921 |
| 4             | 7             | 0           | 1.341856                | -1.347700 | -0.391324 |
| 5             | 6             | 0           | 1.673900                | -0.178400 | 0.350266  |
| 6             | 6             | 0           | 2.148694                | -1.488283 | -1.618127 |
| 7             | 6             | 0           | 3.171092                | 0.041967  | 0.523337  |
| 8             | 6             | 0           | 3.626373                | -1.638158 | -1.292608 |
| 9             | 1             | 0           | 1.772929                | -2.354473 | -2.158282 |
| 10            | 1             | 0           | 1.999850                | -0.608663 | -2.265084 |
| 11            | 6             | 0           | 3.641207                | 0.817509  | 1.595788  |
| 12            | 6             | 0           | 4.103710                | -0.611854 | -0.296888 |
| 13            | 1             | 0           | 3.803532                | -2.637810 | -0.870768 |
| 14            | 1             | 0           | 4.209157                | -1.581956 | -2.220495 |
| 15            | 6             | 0           | 5.002893                | 1.036423  | 1.789426  |
| 16            | 1             | 0           | 2.938801                | 1.227213  | 2.317131  |

|    |   |   |           |           |           |
|----|---|---|-----------|-----------|-----------|
| 17 | 6 | 0 | 5.471058  | -0.384152 | -0.098140 |
| 18 | 6 | 0 | 5.924248  | 0.449403  | 0.920623  |
| 19 | 1 | 0 | 5.341046  | 1.645547  | 2.622825  |
| 20 | 1 | 0 | 6.186118  | -0.888664 | -0.744126 |
| 21 | 1 | 0 | 6.989522  | 0.614403  | 1.057162  |
| 22 | 1 | 0 | 1.243384  | -0.226212 | 1.350462  |
| 23 | 6 | 0 | -0.207636 | 0.814310  | -0.921945 |
| 24 | 6 | 0 | -1.302223 | 1.750083  | -0.998563 |
| 25 | 7 | 0 | 0.917793  | 1.069638  | -0.252308 |
| 26 | 6 | 0 | -2.310813 | 1.579907  | -1.966249 |
| 27 | 6 | 0 | -1.393443 | 2.800704  | -0.056254 |
| 28 | 6 | 0 | 1.020567  | 2.392144  | 0.398106  |
| 29 | 6 | 0 | -3.385754 | 2.460808  | -2.010535 |
| 30 | 1 | 0 | -2.240029 | 0.754307  | -2.668888 |
| 31 | 6 | 0 | -2.475735 | 3.671576  | -0.112274 |
| 32 | 6 | 0 | -0.310246 | 2.864658  | 0.992533  |
| 33 | 1 | 0 | 1.799411  | 2.355760  | 1.154394  |
| 34 | 1 | 0 | 1.354346  | 3.101490  | -0.370398 |
| 35 | 6 | 0 | -3.465878 | 3.508673  | -1.088081 |
| 36 | 1 | 0 | -4.163209 | 2.331123  | -2.757412 |
| 37 | 1 | 0 | -2.553168 | 4.481501  | 0.609207  |
| 38 | 1 | 0 | -0.585737 | 2.225946  | 1.845265  |
| 39 | 1 | 0 | -0.192285 | 3.882140  | 1.382241  |
| 40 | 1 | 0 | -4.303631 | 4.199489  | -1.123762 |
| 41 | 1 | 0 | -0.236568 | -0.047578 | -1.575548 |
| 42 | 1 | 0 | -0.314042 | -1.014890 | 1.544717  |
| 43 | 6 | 0 | -2.241789 | -1.620593 | 0.968140  |
| 44 | 6 | 0 | -2.690467 | -1.201441 | 2.246118  |
| 45 | 6 | 0 | -3.220444 | -2.135064 | 0.085978  |
| 46 | 6 | 0 | -4.023394 | -1.292566 | 2.627365  |
| 47 | 1 | 0 | -1.963444 | -0.800790 | 2.951148  |
| 48 | 6 | 0 | -4.556336 | -2.220375 | 0.471999  |
| 49 | 1 | 0 | -2.912293 | -2.479116 | -0.892144 |
| 50 | 6 | 0 | -4.972764 | -1.804621 | 1.738454  |
| 51 | 1 | 0 | -4.322936 | -0.965716 | 3.620466  |
| 52 | 1 | 0 | -5.282383 | -2.624785 | -0.229742 |
| 53 | 1 | 0 | -6.016976 | -1.881126 | 2.030400  |

---

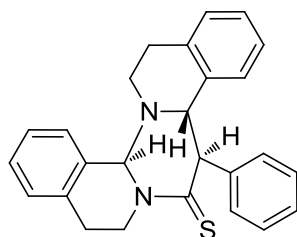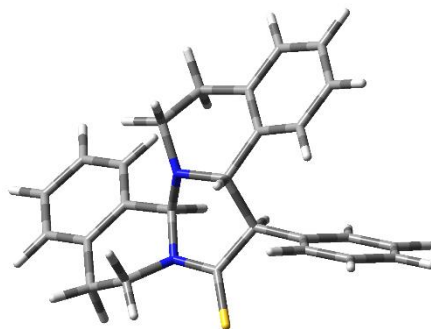

| Center Number | Atomic Number | Atomic Type | Coordinates (Angstroms) |           |           |
|---------------|---------------|-------------|-------------------------|-----------|-----------|
|               |               |             | X                       | Y         | Z         |
| 1             | 6             | 0           | -0.953703               | -0.752049 | 0.321530  |
| 2             | 6             | 0           | -0.007272               | -1.931594 | 0.014693  |
| 3             | 16            | 0           | -0.513265               | -3.498089 | -0.253010 |
| 4             | 7             | 0           | 1.296538                | -1.544546 | -0.064683 |
| 5             | 6             | 0           | 1.590734                | -0.129631 | 0.206526  |
| 6             | 6             | 0           | 2.217079                | -2.229368 | -0.985065 |
| 7             | 6             | 0           | 3.100122                | 0.128051  | 0.310044  |
| 8             | 6             | 0           | 3.631479                | -2.231391 | -0.441106 |
| 9             | 1             | 0           | 1.840922                | -3.239450 | -1.132749 |
| 10            | 1             | 0           | 2.178080                | -1.692384 | -1.944496 |
| 11            | 6             | 0           | 3.547579                | 1.336264  | 0.871618  |
| 12            | 6             | 0           | 4.056998                | -0.852955 | -0.000992 |
| 13            | 1             | 0           | 3.692192                | -2.919891 | 0.413644  |
| 14            | 1             | 0           | 4.314984                | -2.619837 | -1.206062 |
| 15            | 6             | 0           | 4.901038                | 1.606848  | 1.044983  |
| 16            | 1             | 0           | 2.824773                | 2.077530  | 1.193347  |
| 17            | 6             | 0           | 5.419568                | -0.571732 | 0.175001  |
| 18            | 6             | 0           | 5.849478                | 0.649861  | 0.679362  |
| 19            | 1             | 0           | 5.211207                | 2.556045  | 1.472830  |
| 20            | 1             | 0           | 6.146870                | -1.339404 | -0.080180 |
| 21            | 1             | 0           | 6.910417                | 0.847822  | 0.805162  |
| 22            | 1             | 0           | 1.216733                | 0.067956  | 1.222503  |
| 23            | 6             | 0           | -0.642310               | 0.400864  | -0.733838 |
| 24            | 6             | 0           | -1.468607               | 1.679312  | -0.490426 |
| 25            | 7             | 0           | 0.834491                | 0.632557  | -0.807437 |
| 26            | 6             | 0           | -2.856659               | 1.669252  | -0.711724 |
| 27            | 6             | 0           | -0.869845               | 2.899410  | -0.123674 |
| 28            | 6             | 0           | 1.212246                | 2.008610  | -1.104516 |
| 29            | 6             | 0           | -3.640095               | 2.798228  | -0.487581 |
| 30            | 1             | 0           | -3.337961               | 0.765752  | -1.063562 |
| 31            | 6             | 0           | -1.665148               | 4.031636  | 0.097252  |

|    |   |   |           |           |           |
|----|---|---|-----------|-----------|-----------|
| 32 | 6 | 0 | 0.633499  | 3.013507  | -0.099237 |
| 33 | 1 | 0 | 2.299688  | 2.070486  | -1.164693 |
| 34 | 1 | 0 | 0.826861  | 2.253521  | -2.103251 |
| 35 | 6 | 0 | -3.046223 | 3.986150  | -0.059775 |
| 36 | 1 | 0 | -4.712444 | 2.748120  | -0.656015 |
| 37 | 1 | 0 | -1.179619 | 4.965434  | 0.373584  |
| 38 | 1 | 0 | 1.026269  | 2.817203  | 0.907788  |
| 39 | 1 | 0 | 0.937233  | 4.036834  | -0.355216 |
| 40 | 1 | 0 | -3.647781 | 4.874103  | 0.115993  |
| 41 | 1 | 0 | -0.958293 | 0.003870  | -1.710137 |
| 42 | 1 | 0 | -0.677632 | -0.351772 | 1.304439  |
| 43 | 6 | 0 | -2.417294 | -1.139380 | 0.424280  |
| 44 | 6 | 0 | -3.095420 | -0.928890 | 1.628416  |
| 45 | 6 | 0 | -3.130062 | -1.685911 | -0.654167 |
| 46 | 6 | 0 | -4.448774 | -1.249052 | 1.761720  |
| 47 | 1 | 0 | -2.561349 | -0.504896 | 2.475874  |
| 48 | 6 | 0 | -4.481661 | -1.999451 | -0.529259 |
| 49 | 1 | 0 | -2.625272 | -1.871869 | -1.596339 |
| 50 | 6 | 0 | -5.147162 | -1.783267 | 0.680943  |
| 51 | 1 | 0 | -4.952692 | -1.076513 | 2.709026  |
| 52 | 1 | 0 | -5.015233 | -2.422143 | -1.376500 |
| 53 | 1 | 0 | -6.200426 | -2.033108 | 0.777969  |

**1g**

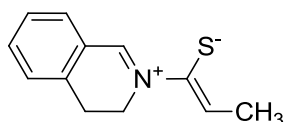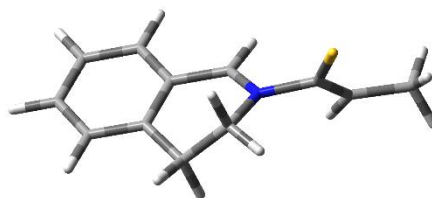

| Center Number | Atomic Number | Atomic Type | Coordinates (Angstroms) |           |           |
|---------------|---------------|-------------|-------------------------|-----------|-----------|
|               |               |             | X                       | Y         | Z         |
| 1             | 6             | 0           | 2.389062                | 1.544804  | -0.596966 |
| 2             | 6             | 0           | 1.500312                | 0.559538  | -0.131331 |
| 3             | 6             | 0           | 1.995306                | -0.654398 | 0.398198  |
| 4             | 6             | 0           | 3.370912                | -0.865675 | 0.429667  |
| 5             | 6             | 0           | 4.250203                | 0.112062  | -0.046615 |
| 6             | 6             | 0           | 3.760510                | 1.318756  | -0.556788 |
| 7             | 1             | 0           | 1.995602                | 2.475257  | -0.998356 |
| 8             | 1             | 0           | 3.761961                | -1.796729 | 0.832385  |
| 9             | 1             | 0           | 5.321143                | -0.067693 | -0.016268 |

|    |    |   |           |           |           |
|----|----|---|-----------|-----------|-----------|
| 10 | 1  | 0 | 4.447539  | 2.075690  | -0.922888 |
| 11 | 6  | 0 | 0.981257  | -1.628562 | 0.950988  |
| 12 | 1  | 0 | 0.781166  | -1.386528 | 2.005449  |
| 13 | 1  | 0 | 1.368838  | -2.652668 | 0.930727  |
| 14 | 6  | 0 | 0.072451  | 0.778215  | -0.167154 |
| 15 | 1  | 0 | -0.331362 | 1.759688  | -0.391370 |
| 16 | 7  | 0 | -0.799998 | -0.172835 | 0.044356  |
| 17 | 6  | 0 | -0.323576 | -1.577579 | 0.156265  |
| 18 | 1  | 0 | -1.127049 | -2.148132 | 0.622007  |
| 19 | 1  | 0 | -0.189220 | -1.962780 | -0.857989 |
| 20 | 6  | 0 | -2.240992 | 0.084877  | -0.033607 |
| 21 | 16 | 0 | -3.048389 | -0.874825 | -1.208193 |
| 22 | 6  | 0 | -2.680878 | 1.019972  | 0.852187  |
| 23 | 1  | 0 | -1.966837 | 1.463629  | 1.544638  |
| 24 | 6  | 0 | -4.111977 | 1.438612  | 0.962975  |
| 25 | 1  | 0 | -4.754477 | 0.736694  | 0.422929  |
| 26 | 1  | 0 | -4.432374 | 1.489414  | 2.011908  |
| 27 | 1  | 0 | -4.276271 | 2.437476  | 0.530520  |

**TS1-endo-g**

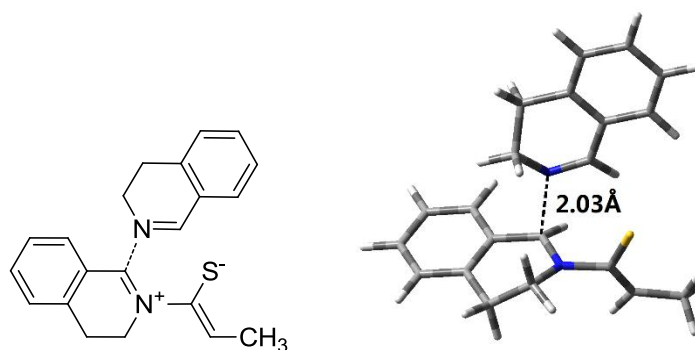

| Center Number | Atomic Number | Atomic Type | Coordinates (Angstroms) |           |           |
|---------------|---------------|-------------|-------------------------|-----------|-----------|
|               |               |             | X                       | Y         | Z         |
| 1             | 6             | 0           | 0.729153                | 3.493221  | -0.796403 |
| 2             | 6             | 0           | 0.330598                | 2.510596  | 0.041056  |
| 3             | 16            | 0           | -1.169896               | 2.289286  | 0.906023  |
| 4             | 7             | 0           | 1.301840                | 1.423608  | 0.240380  |
| 5             | 6             | 0           | 1.383937                | 0.432283  | -0.647608 |
| 6             | 6             | 0           | 1.816441                | 1.189779  | 1.602229  |
| 7             | 6             | 0           | 2.456002                | -0.578236 | -0.507900 |
| 8             | 6             | 0           | 3.253305                | 0.674934  | 1.521659  |
| 9             | 1             | 0           | 1.759677                | 2.138967  | 2.135689  |
| 10            | 1             | 0           | 1.167734                | 0.478591  | 2.126791  |



|    |   |   |           |           |           |
|----|---|---|-----------|-----------|-----------|
| 11 | 6 | 0 | 2.580020  | -1.604897 | -1.454666 |
| 12 | 6 | 0 | 3.376502  | -0.478097 | 0.550327  |
| 13 | 1 | 0 | 3.913216  | 1.492480  | 1.196196  |
| 14 | 1 | 0 | 3.592851  | 0.374871  | 2.519819  |
| 15 | 6 | 0 | 3.610681  | -2.534203 | -1.354374 |
| 16 | 1 | 0 | 1.851287  | -1.674226 | -2.257991 |
| 17 | 6 | 0 | 4.405985  | -1.420470 | 0.640982  |
| 18 | 6 | 0 | 4.525276  | -2.441820 | -0.300556 |
| 19 | 1 | 0 | 3.701624  | -3.327786 | -2.090490 |
| 20 | 1 | 0 | 5.120525  | -1.350124 | 1.457855  |
| 21 | 1 | 0 | 5.329996  | -3.166735 | -0.212982 |
| 22 | 1 | 0 | 1.741312  | 3.439258  | -1.198093 |
| 23 | 1 | 0 | 1.076289  | 0.701571  | -1.652248 |
| 24 | 7 | 0 | -0.276869 | -0.723655 | -0.481737 |
| 25 | 6 | 0 | -1.374771 | -0.081810 | -0.744277 |
| 26 | 6 | 0 | -0.351790 | -1.788482 | 0.519933  |
| 27 | 6 | 0 | -2.705966 | -0.560733 | -0.351841 |
| 28 | 1 | 0 | -1.318378 | 0.750986  | -1.440095 |
| 29 | 6 | 0 | -1.564858 | -2.694887 | 0.284070  |
| 30 | 1 | 0 | 0.577192  | -2.364436 | 0.486732  |
| 31 | 1 | 0 | -0.427106 | -1.321215 | 1.514680  |
| 32 | 6 | 0 | -3.846833 | 0.232574  | -0.538137 |
| 33 | 6 | 0 | -2.825930 | -1.869011 | 0.155748  |
| 34 | 1 | 0 | -1.408590 | -3.278221 | -0.636342 |
| 35 | 1 | 0 | -1.652442 | -3.417665 | 1.103756  |
| 36 | 6 | 0 | -5.103942 | -0.267371 | -0.214493 |
| 37 | 1 | 0 | -3.728462 | 1.249384  | -0.901463 |
| 38 | 6 | 0 | -4.093225 | -2.359404 | 0.474483  |
| 39 | 6 | 0 | -5.226743 | -1.564923 | 0.293447  |
| 40 | 1 | 0 | -5.986109 | 0.352067  | -0.348994 |
| 41 | 1 | 0 | -4.194004 | -3.368081 | 0.869086  |
| 42 | 1 | 0 | -6.206864 | -1.956385 | 0.552772  |
| 43 | 6 | 0 | -0.107187 | 4.671132  | -1.194992 |
| 44 | 1 | 0 | -1.114022 | 4.586754  | -0.777690 |
| 45 | 1 | 0 | 0.332676  | 5.613651  | -0.837315 |
| 46 | 1 | 0 | -0.184795 | 4.756984  | -2.288660 |

---

**C-endo-g**

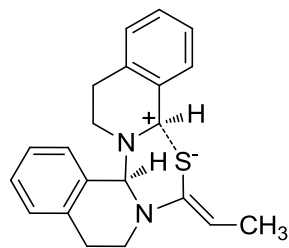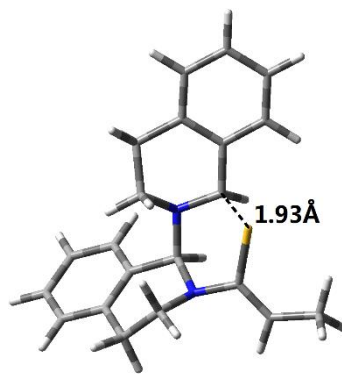

| Center Number | Atomic Number | Atomic Type | Coordinates (Angstroms) |           |           |
|---------------|---------------|-------------|-------------------------|-----------|-----------|
|               |               |             | X                       | Y         | Z         |
| 1             | 6             | 0           | 0.511065                | 3.688228  | -0.464490 |
| 2             | 6             | 0           | 0.258756                | 2.430962  | -0.064193 |
| 3             | 16            | 0           | -1.393939               | 1.882916  | 0.431296  |
| 4             | 7             | 0           | 1.325044                | 1.490974  | 0.045558  |
| 5             | 6             | 0           | 1.093096                | 0.212611  | -0.632032 |
| 6             | 6             | 0           | 1.997153                | 1.407947  | 1.348881  |
| 7             | 6             | 0           | 2.306791                | -0.699840 | -0.534161 |
| 8             | 6             | 0           | 3.406979                | 0.859788  | 1.131925  |
| 9             | 1             | 0           | 2.042733                | 2.418850  | 1.762127  |
| 10            | 1             | 0           | 1.448720                | 0.785975  | 2.073836  |
| 11            | 6             | 0           | 2.324663                | -1.866462 | -1.311762 |
| 12            | 6             | 0           | 3.396388                | -0.403320 | 0.298221  |
| 13            | 1             | 0           | 4.005203                | 1.626461  | 0.619841  |
| 14            | 1             | 0           | 3.891451                | 0.670958  | 2.098379  |
| 15            | 6             | 0           | 3.411656                | -2.734368 | -1.274018 |
| 16            | 1             | 0           | 1.466929                | -2.089642 | -1.940646 |
| 17            | 6             | 0           | 4.484118                | -1.288273 | 0.331550  |
| 18            | 6             | 0           | 4.499210                | -2.442724 | -0.445638 |
| 19            | 1             | 0           | 3.412389                | -3.632926 | -1.885111 |
| 20            | 1             | 0           | 5.327074                | -1.062648 | 0.981521  |
| 21            | 1             | 0           | 5.352326                | -3.114862 | -0.404152 |
| 22            | 1             | 0           | 1.553820                | 3.910456  | -0.690820 |
| 23            | 1             | 0           | 0.943195                | 0.469469  | -1.689922 |
| 24            | 7             | 0           | -0.140458               | -0.522078 | -0.267307 |
| 25            | 6             | 0           | -1.324235               | 0.227047  | -0.557009 |
| 26            | 6             | 0           | -0.203973               | -1.210451 | 1.026760  |
| 27            | 6             | 0           | -2.603959               | -0.530187 | -0.292549 |
| 28            | 1             | 0           | -1.285696               | 0.552466  | -1.601430 |
| 29            | 6             | 0           | -1.283506               | -2.290814 | 0.951315  |
| 30            | 1             | 0           | 0.769217                | -1.660940 | 1.231182  |

|    |   |   |           |           |           |
|----|---|---|-----------|-----------|-----------|
| 31 | 1 | 0 | -0.435827 | -0.509140 | 1.844266  |
| 32 | 6 | 0 | -3.815580 | -0.029087 | -0.788008 |
| 33 | 6 | 0 | -2.591597 | -1.730926 | 0.434803  |
| 34 | 1 | 0 | -0.936800 | -3.091988 | 0.283677  |
| 35 | 1 | 0 | -1.429799 | -2.742540 | 1.940726  |
| 36 | 6 | 0 | -5.010265 | -0.708778 | -0.569378 |
| 37 | 1 | 0 | -3.814842 | 0.905168  | -1.344340 |
| 38 | 6 | 0 | -3.800877 | -2.404776 | 0.649291  |
| 39 | 6 | 0 | -5.002568 | -1.903814 | 0.154991  |
| 40 | 1 | 0 | -5.942035 | -0.309748 | -0.960739 |
| 41 | 1 | 0 | -3.793788 | -3.334158 | 1.215143  |
| 42 | 1 | 0 | -5.930117 | -2.440885 | 0.335021  |
| 43 | 6 | 0 | -0.467555 | 4.813986  | -0.607608 |
| 44 | 1 | 0 | -1.501063 | 4.464189  | -0.539446 |
| 45 | 1 | 0 | -0.316198 | 5.573970  | 0.172047  |
| 46 | 1 | 0 | -0.330543 | 5.322098  | -1.571013 |

**TS2-Si-g**

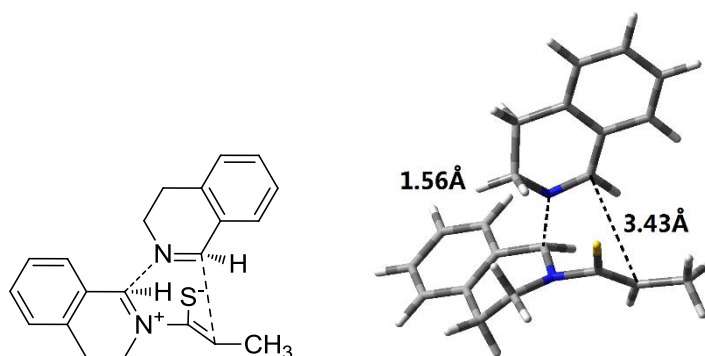

| Center Number | Atomic Number | Atomic Type | Coordinates (Angstroms) |           |           |
|---------------|---------------|-------------|-------------------------|-----------|-----------|
|               |               |             | X                       | Y         | Z         |
| 1             | 6             | 0           | 0.241579                | 2.945394  | 1.155519  |
| 2             | 6             | 0           | 0.071656                | 2.307754  | -0.034850 |
| 3             | 16            | 0           | 1.134896                | 2.281112  | -1.424376 |
| 4             | 7             | 0           | -1.139536               | 1.491498  | -0.124605 |
| 5             | 6             | 0           | -1.158597               | 0.309572  | 0.650071  |
| 6             | 6             | 0           | -1.913961               | 1.514665  | -1.368450 |
| 7             | 6             | 0           | -2.424272               | -0.516313 | 0.535369  |
| 8             | 6             | 0           | -3.374488               | 1.202780  | -1.043904 |
| 9             | 1             | 0           | -1.806050               | 2.514636  | -1.789553 |
| 10            | 1             | 0           | -1.531126               | 0.817063  | -2.125856 |
| 11            | 6             | 0           | -2.535454               | -1.699995 | 1.277739  |
| 12            | 6             | 0           | -3.495476               | -0.085060 | -0.261947 |

|    |   |   |           |           |           |
|----|---|---|-----------|-----------|-----------|
| 13 | 1 | 0 | -3.793685 | 2.029672  | -0.453567 |
| 14 | 1 | 0 | -3.961704 | 1.139877  | -1.968404 |
| 15 | 6 | 0 | -3.699050 | -2.462505 | 1.230988  |
| 16 | 1 | 0 | -1.700518 | -2.023835 | 1.895164  |
| 17 | 6 | 0 | -4.660896 | -0.862671 | -0.301225 |
| 18 | 6 | 0 | -4.767587 | -2.039641 | 0.435515  |
| 19 | 1 | 0 | -3.774291 | -3.377773 | 1.811420  |
| 20 | 1 | 0 | -5.491394 | -0.535078 | -0.922406 |
| 21 | 1 | 0 | -5.680116 | -2.627932 | 0.389227  |
| 22 | 1 | 0 | -0.573914 | 2.894137  | 1.879237  |
| 23 | 1 | 0 | -0.964516 | 0.547473  | 1.701155  |
| 24 | 7 | 0 | 0.075863  | -0.578924 | 0.304191  |
| 25 | 6 | 0 | 1.185356  | -0.349369 | 0.954223  |
| 26 | 6 | 0 | 0.165832  | -1.151966 | -1.055972 |
| 27 | 6 | 0 | 2.473937  | -0.834569 | 0.522947  |
| 28 | 1 | 0 | 1.108437  | 0.236509  | 1.864914  |
| 29 | 6 | 0 | 1.225463  | -2.250775 | -1.116153 |
| 30 | 1 | 0 | -0.819516 | -1.537762 | -1.320925 |
| 31 | 1 | 0 | 0.432270  | -0.303754 | -1.710822 |
| 32 | 6 | 0 | 3.647424  | -0.390977 | 1.154219  |
| 33 | 6 | 0 | 2.534567  | -1.777350 | -0.526360 |
| 34 | 1 | 0 | 0.877999  | -3.141478 | -0.570474 |
| 35 | 1 | 0 | 1.357501  | -2.552620 | -2.160432 |
| 36 | 6 | 0 | 4.883060  | -0.872488 | 0.735418  |
| 37 | 1 | 0 | 3.582587  | 0.345738  | 1.950237  |
| 38 | 6 | 0 | 3.777232  | -2.257387 | -0.926605 |
| 39 | 6 | 0 | 4.945435  | -1.805163 | -0.303612 |
| 40 | 1 | 0 | 5.793985  | -0.520348 | 1.209513  |
| 41 | 1 | 0 | 3.839273  | -2.982175 | -1.734423 |
| 42 | 1 | 0 | 5.909371  | -2.181012 | -0.635231 |
| 43 | 6 | 0 | 1.424606  | 3.792672  | 1.517228  |
| 44 | 1 | 0 | 1.155877  | 4.858717  | 1.577096  |
| 45 | 1 | 0 | 1.838142  | 3.524450  | 2.502155  |
| 46 | 1 | 0 | 2.210571  | 3.690023  | 0.763944  |

---

7g

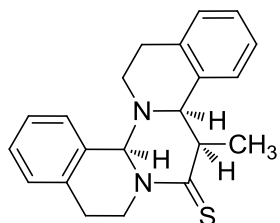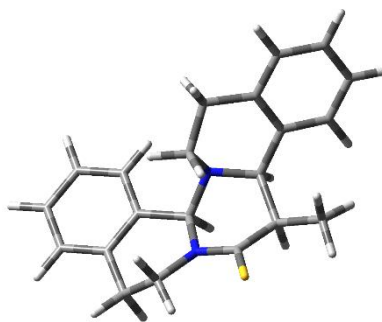

| Center Number | Atomic Number | Atomic Type | Coordinates (Angstroms) |           |           |
|---------------|---------------|-------------|-------------------------|-----------|-----------|
|               |               |             | X                       | Y         | Z         |
| 1             | 6             | 0           | -1.111332               | 1.577307  | -0.955671 |
| 2             | 6             | 0           | 0.018394                | 2.110037  | -0.053466 |
| 3             | 16            | 0           | -0.151058               | 3.483200  | 0.894487  |
| 4             | 7             | 0           | 1.183809                | 1.415853  | -0.137774 |
| 5             | 6             | 0           | 1.127519                | 0.026763  | -0.694167 |
| 6             | 6             | 0           | 2.383267                | 1.875914  | 0.571231  |
| 7             | 6             | 0           | 2.382408                | -0.790890 | -0.412265 |
| 8             | 6             | 0           | 3.646659                | 1.339887  | -0.097732 |
| 9             | 1             | 0           | 2.363409                | 2.966623  | 0.565520  |
| 10            | 1             | 0           | 2.339975                | 1.561383  | 1.623589  |
| 11            | 6             | 0           | 2.318263                | -2.187883 | -0.490087 |
| 12            | 6             | 0           | 3.613585                | -0.164125 | -0.175345 |
| 13            | 1             | 0           | 3.735125                | 1.777570  | -1.102975 |
| 14            | 1             | 0           | 4.520791                | 1.679200  | 0.469327  |
| 15            | 6             | 0           | 3.466781                | -2.958580 | -0.319573 |
| 16            | 1             | 0           | 1.358294                | -2.657219 | -0.678732 |
| 17            | 6             | 0           | 4.759890                | -0.947284 | -0.000367 |
| 18            | 6             | 0           | 4.692905                | -2.337210 | -0.073408 |
| 19            | 1             | 0           | 3.403717                | -4.041822 | -0.377065 |
| 20            | 1             | 0           | 5.710619                | -0.457529 | 0.198084  |
| 21            | 1             | 0           | 5.591320                | -2.932597 | 0.065433  |
| 22            | 1             | 0           | -0.738765               | 1.798501  | -1.967769 |
| 23            | 1             | 0           | 1.039810                | 0.119705  | -1.787555 |
| 24            | 7             | 0           | -0.084878               | -0.639248 | -0.253515 |
| 25            | 6             | 0           | -1.233438               | -0.030358 | -0.933819 |
| 26            | 6             | 0           | -0.239601               | -0.671836 | 1.211881  |
| 27            | 6             | 0           | -2.544825               | -0.623950 | -0.433627 |
| 28            | 1             | 0           | -1.150117               | -0.332153 | -1.985671 |
| 29            | 6             | 0           | -1.375277               | -1.616997 | 1.581058  |
| 30            | 1             | 0           | 0.702602                | -1.021165 | 1.643685  |
| 31            | 1             | 0           | -0.443091               | 0.327293  | 1.629093  |
| 32            | 6             | 0           | -3.692667               | -0.528368 | -1.236220 |

|    |   |   |           |           |           |
|----|---|---|-----------|-----------|-----------|
| 33 | 6 | 0 | -2.621374 | -1.344886 | 0.769241  |
| 34 | 1 | 0 | -1.055012 | -2.653027 | 1.401907  |
| 35 | 1 | 0 | -1.588998 | -1.534750 | 2.654057  |
| 36 | 6 | 0 | -4.908531 | -1.071458 | -0.832961 |
| 37 | 1 | 0 | -3.627854 | -0.031246 | -2.200749 |
| 38 | 6 | 0 | -3.851923 | -1.882245 | 1.172228  |
| 39 | 6 | 0 | -4.993534 | -1.741316 | 0.389907  |
| 40 | 1 | 0 | -5.782532 | -0.978645 | -1.471792 |
| 41 | 1 | 0 | -3.903111 | -2.430591 | 2.110704  |
| 42 | 1 | 0 | -5.938096 | -2.164699 | 0.720751  |
| 43 | 6 | 0 | -2.427053 | 2.338937  | -0.791220 |
| 44 | 1 | 0 | -2.253204 | 3.411656  | -0.891151 |
| 45 | 1 | 0 | -3.145765 | 2.032658  | -1.555628 |
| 46 | 1 | 0 | -2.875398 | 2.164674  | 0.190439  |

4g

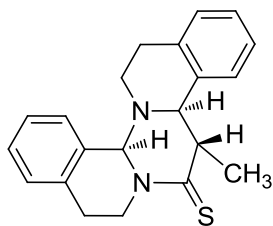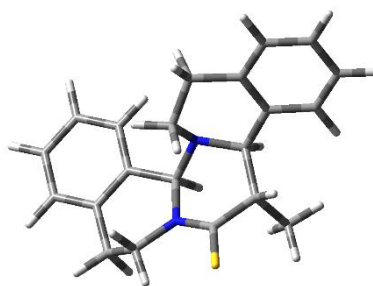

| Center Number | Atomic Number | Atomic Type | Coordinates (Angstroms) |           |           |
|---------------|---------------|-------------|-------------------------|-----------|-----------|
|               |               |             | X                       | Y         | Z         |
| 1             | 6             | 0           | 1.212394                | 1.608221  | 0.623211  |
| 2             | 6             | 0           | 0.013110                | 2.082863  | -0.204832 |
| 3             | 16            | 0           | 0.173643                | 3.457534  | -1.154033 |
| 4             | 7             | 0           | -1.133885               | 1.376951  | -0.079242 |
| 5             | 6             | 0           | -1.072339               | 0.037896  | 0.599616  |
| 6             | 6             | 0           | -2.352529               | 1.793806  | -0.783547 |
| 7             | 6             | 0           | -2.327923               | -0.800170 | 0.390791  |
| 8             | 6             | 0           | -3.598799               | 1.305903  | -0.049284 |
| 9             | 1             | 0           | -2.329751               | 2.882287  | -0.852193 |
| 10            | 1             | 0           | -2.335588               | 1.404934  | -1.811312 |
| 11            | 6             | 0           | -2.264822               | -2.187640 | 0.571109  |
| 12            | 6             | 0           | -3.562832               | -0.189699 | 0.129135  |
| 13            | 1             | 0           | -3.662203               | 1.810626  | 0.926006  |
| 14            | 1             | 0           | -4.486883               | 1.607311  | -0.615932 |
| 15            | 6             | 0           | -3.416206               | -2.966680 | 0.472327  |

|    |   |   |           |           |           |
|----|---|---|-----------|-----------|-----------|
| 16 | 1 | 0 | -1.304161 | -2.643726 | 0.786754  |
| 17 | 6 | 0 | -4.711965 | -0.981364 | 0.027375  |
| 18 | 6 | 0 | -4.644946 | -2.362749 | 0.198196  |
| 19 | 1 | 0 | -3.353304 | -4.042843 | 0.608596  |
| 20 | 1 | 0 | -5.665450 | -0.505227 | -0.189947 |
| 21 | 1 | 0 | -5.545703 | -2.964930 | 0.115339  |
| 22 | 1 | 0 | -0.996575 | 0.236970  | 1.679105  |
| 23 | 7 | 0 | 0.143635  | -0.662261 | 0.243772  |
| 24 | 6 | 0 | 1.284423  | 0.040442  | 0.844827  |
| 25 | 6 | 0 | 0.312174  | -0.919143 | -1.194786 |
| 26 | 6 | 0 | 2.615928  | -0.546968 | 0.399205  |
| 27 | 1 | 0 | 1.198187  | -0.131400 | 1.926845  |
| 28 | 6 | 0 | 1.452387  | -1.915060 | -1.381792 |
| 29 | 1 | 0 | -0.623548 | -1.332895 | -1.580304 |
| 30 | 1 | 0 | 0.523854  | 0.002762  | -1.761899 |
| 31 | 6 | 0 | 3.787339  | -0.164377 | 1.069654  |
| 32 | 6 | 0 | 2.703197  | -1.462892 | -0.660817 |
| 33 | 1 | 0 | 1.136741  | -2.894444 | -0.995619 |
| 34 | 1 | 0 | 1.658314  | -2.047426 | -2.451148 |
| 35 | 6 | 0 | 5.029515  | -0.668783 | 0.695847  |
| 36 | 1 | 0 | 3.724076  | 0.534643  | 1.900301  |
| 37 | 6 | 0 | 3.959091  | -1.962889 | -1.031388 |
| 38 | 6 | 0 | 5.116998  | -1.574352 | -0.364223 |
| 39 | 1 | 0 | 5.923895  | -0.359253 | 1.229657  |
| 40 | 1 | 0 | 4.021576  | -2.666651 | -1.858955 |
| 41 | 1 | 0 | 6.081243  | -1.972723 | -0.668168 |
| 42 | 6 | 0 | 1.209052  | 2.362260  | 1.970845  |
| 43 | 1 | 0 | 1.211461  | 3.442236  | 1.800056  |
| 44 | 1 | 0 | 0.326367  | 2.110218  | 2.571416  |
| 45 | 1 | 0 | 2.097656  | 2.102884  | 2.557703  |
| 46 | 1 | 0 | 2.093766  | 1.931510  | 0.067692  |

**TS1-*exo-g***

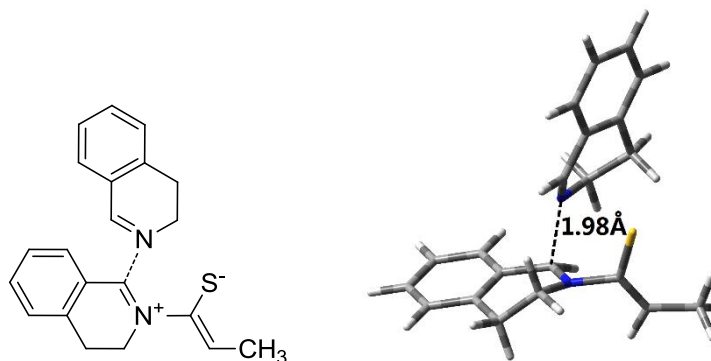

| Center<br>Number | Atomic<br>Number | Atomic<br>Type | Coordinates (Angstroms) |           |           |
|------------------|------------------|----------------|-------------------------|-----------|-----------|
|                  |                  |                | X                       | Y         | Z         |
| 1                | 6                | 0              | -0.523533               | 3.320685  | 0.835611  |
| 2                | 6                | 0              | -0.244346               | 2.358266  | -0.069725 |
| 3                | 16               | 0              | 1.187847                | 2.089782  | -1.036251 |
| 4                | 7                | 0              | -1.290750               | 1.347523  | -0.274645 |
| 5                | 6                | 0              | -1.427725               | 0.355887  | 0.613997  |
| 6                | 6                | 0              | -1.857620               | 1.200611  | -1.629062 |
| 7                | 6                | 0              | -2.502944               | -0.648294 | 0.406346  |
| 8                | 6                | 0              | -3.310667               | 0.744589  | -1.522288 |
| 9                | 1                | 0              | -1.775495               | 2.174444  | -2.112870 |
| 10               | 1                | 0              | -1.270963               | 0.492171  | -2.223982 |
| 11               | 6                | 0              | -2.629087               | -1.738213 | 1.278692  |
| 12               | 6                | 0              | -3.433649               | -0.470762 | -0.632194 |
| 13               | 1                | 0              | -3.917214               | 1.563643  | -1.108747 |
| 14               | 1                | 0              | -3.705590               | 0.531882  | -2.522386 |
| 15               | 6                | 0              | -3.663400               | -2.654193 | 1.120630  |
| 16               | 1                | 0              | -1.901870               | -1.870996 | 2.074720  |
| 17               | 6                | 0              | -4.467770               | -1.400994 | -0.783665 |
| 18               | 6                | 0              | -4.584911               | -2.486105 | 0.082365  |
| 19               | 1                | 0              | -3.750910               | -3.497938 | 1.799126  |
| 20               | 1                | 0              | -5.186521               | -1.268781 | -1.589054 |
| 21               | 1                | 0              | -5.392313               | -3.200980 | -0.051067 |
| 22               | 1                | 0              | -1.516927               | 3.322005  | 1.285420  |
| 23               | 1                | 0              | -1.214985               | 0.645498  | 1.638525  |
| 24               | 7                | 0              | 0.241300                | -0.716616 | 0.649310  |
| 25               | 6                | 0              | 0.938170                | -0.727685 | -0.449029 |
| 26               | 6                | 0              | 0.955781                | -0.817182 | 1.928084  |
| 27               | 6                | 0              | 2.371213                | -1.031332 | -0.489492 |
| 28               | 1                | 0              | 0.393343                | -0.707793 | -1.386606 |
| 29               | 6                | 0              | 2.386145                | -0.265235 | 1.868367  |
| 30               | 1                | 0              | 0.375129                | -0.281683 | 2.688905  |
| 31               | 1                | 0              | 0.968186                | -1.876941 | 2.225068  |
| 32               | 6                | 0              | 2.984176                | -1.516143 | -1.651197 |
| 33               | 6                | 0              | 3.119633                | -0.858198 | 0.690925  |
| 34               | 1                | 0              | 2.339720                | 0.825048  | 1.736854  |
| 35               | 1                | 0              | 2.906409                | -0.468370 | 2.811352  |
| 36               | 6                | 0              | 4.339749                | -1.838322 | -1.640546 |
| 37               | 1                | 0              | 2.397459                | -1.636222 | -2.558669 |
| 38               | 6                | 0              | 4.474218                | -1.180486 | 0.689387  |
| 39               | 6                | 0              | 5.083339                | -1.672080 | -0.469639 |
| 40               | 1                | 0              | 4.816245                | -2.214520 | -2.541382 |
| 41               | 1                | 0              | 5.060333                | -1.043529 | 1.595242  |



|    |   |   |          |           |           |
|----|---|---|----------|-----------|-----------|
| 42 | 1 | 0 | 6.140748 | -1.922454 | -0.458053 |
| 43 | 6 | 0 | 0.422213 | 4.406586  | 1.250900  |
| 44 | 1 | 0 | 1.413953 | 4.238904  | 0.822073  |
| 45 | 1 | 0 | 0.072773 | 5.394711  | 0.916809  |
| 46 | 1 | 0 | 0.515175 | 4.460638  | 2.345281  |

**C-*exo-g***

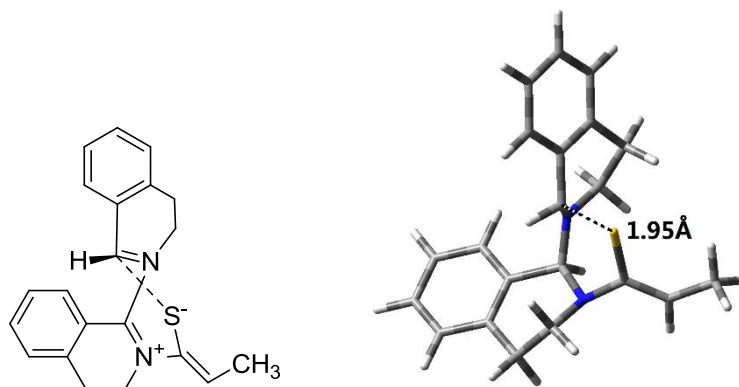

| Center Number | Atomic Number | Atomic Type | Coordinates (Angstroms) |           |           |
|---------------|---------------|-------------|-------------------------|-----------|-----------|
|               |               |             | X                       | Y         | Z         |
| 1             | 6             | 0           | -0.179633               | 3.591604  | 0.465709  |
| 2             | 6             | 0           | -0.219863               | 2.375678  | -0.101869 |
| 3             | 16            | 0           | 1.147535                | 1.687004  | -1.059458 |
| 4             | 7             | 0           | -1.392877               | 1.568173  | -0.011103 |
| 5             | 6             | 0           | -1.211996               | 0.347822  | 0.804203  |
| 6             | 6             | 0           | -2.140961               | 1.450760  | -1.269236 |
| 7             | 6             | 0           | -2.246362               | -0.736592 | 0.479246  |
| 8             | 6             | 0           | -3.519589               | 0.866618  | -0.979524 |
| 9             | 1             | 0           | -2.227083               | 2.460096  | -1.682140 |
| 10            | 1             | 0           | -1.625251               | 0.834205  | -2.025358 |
| 11            | 6             | 0           | -2.087795               | -2.003705 | 1.056813  |
| 12            | 6             | 0           | -3.372495               | -0.481706 | -0.318271 |
| 13            | 1             | 0           | -4.067515               | 1.561061  | -0.327142 |
| 14            | 1             | 0           | -4.093918               | 0.774365  | -1.909275 |
| 15            | 6             | 0           | -3.035101               | -3.004807 | 0.861071  |
| 16            | 1             | 0           | -1.203116               | -2.203655 | 1.653904  |
| 17            | 6             | 0           | -4.316257               | -1.498490 | -0.516983 |
| 18            | 6             | 0           | -4.159167               | -2.750304 | 0.071228  |
| 19            | 1             | 0           | -2.894640               | -3.981211 | 1.317058  |
| 20            | 1             | 0           | -5.179087               | -1.300591 | -1.149542 |
| 21            | 1             | 0           | -4.901526               | -3.526816 | -0.093788 |
| 22            | 1             | 0           | -1.094089               | 3.911618  | 0.963407  |

|    |   |   |           |           |           |
|----|---|---|-----------|-----------|-----------|
| 23 | 1 | 0 | -1.373677 | 0.643764  | 1.850239  |
| 24 | 7 | 0 | 0.159977  | -0.186530 | 0.774063  |
| 25 | 6 | 0 | 0.800041  | -0.149977 | -0.494765 |
| 26 | 6 | 0 | 0.967657  | -0.077896 | 1.999565  |
| 27 | 6 | 0 | 2.103107  | -0.896728 | -0.520904 |
| 28 | 1 | 0 | 0.115276  | -0.540556 | -1.250862 |
| 29 | 6 | 0 | 2.472306  | 0.091673  | 1.725402  |
| 30 | 1 | 0 | 0.617838  | 0.769950  | 2.602878  |
| 31 | 1 | 0 | 0.817669  | -0.984382 | 2.605661  |
| 32 | 6 | 0 | 2.486210  | -1.673183 | -1.616105 |
| 33 | 6 | 0 | 2.938513  | -0.800536 | 0.603038  |
| 34 | 1 | 0 | 2.668655  | 1.136174  | 1.451531  |
| 35 | 1 | 0 | 3.027316  | -0.112216 | 2.648059  |
| 36 | 6 | 0 | 3.702222  | -2.358898 | -1.598578 |
| 37 | 1 | 0 | 1.830801  | -1.745512 | -2.480979 |
| 38 | 6 | 0 | 4.145876  | -1.499969 | 0.618689  |
| 39 | 6 | 0 | 4.530665  | -2.274157 | -0.478779 |
| 40 | 1 | 0 | 3.996485  | -2.963096 | -2.452360 |
| 41 | 1 | 0 | 4.791187  | -1.435125 | 1.492055  |
| 42 | 1 | 0 | 5.474346  | -2.812785 | -0.456659 |
| 43 | 6 | 0 | 0.972227  | 4.551110  | 0.457535  |
| 44 | 1 | 0 | 1.902784  | 4.062525  | 0.152572  |
| 45 | 1 | 0 | 0.792531  | 5.385513  | -0.235144 |
| 46 | 1 | 0 | 1.117132  | 4.993204  | 1.451594  |

**TS2-Re-g**

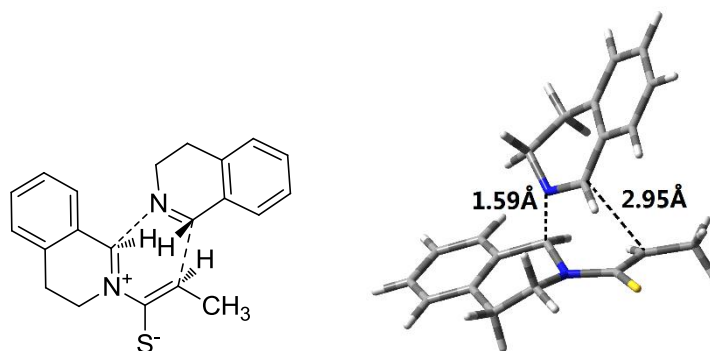

| Center Number | Atomic Number | Atomic Type | Coordinates (Angstroms) |          |           |
|---------------|---------------|-------------|-------------------------|----------|-----------|
|               |               |             | X                       | Y        | Z         |
| 1             | 6             | 0           | 0.642947                | 1.848729 | 1.765945  |
| 2             | 6             | 0           | -0.001215               | 2.237821 | 0.605345  |
| 3             | 16            | 0           | 0.534721                | 3.565391 | -0.353364 |
| 4             | 7             | 0           | -1.090801               | 1.415588 | 0.122785  |

|    |   |   |           |           |           |
|----|---|---|-----------|-----------|-----------|
| 5  | 6 | 0 | -1.127593 | 0.043307  | 0.479649  |
| 6  | 6 | 0 | -1.662673 | 1.671353  | -1.208749 |
| 7  | 6 | 0 | -2.480255 | -0.611169 | 0.249709  |
| 8  | 6 | 0 | -3.142120 | 1.311168  | -1.240208 |
| 9  | 1 | 0 | -1.500012 | 2.722686  | -1.438418 |
| 10 | 1 | 0 | -1.122342 | 1.084381  | -1.969354 |
| 11 | 6 | 0 | -2.843354 | -1.745666 | 0.992871  |
| 12 | 6 | 0 | -3.424451 | -0.032875 | -0.613874 |
| 13 | 1 | 0 | -3.710569 | 2.072797  | -0.687616 |
| 14 | 1 | 0 | -3.503558 | 1.340704  | -2.275803 |
| 15 | 6 | 0 | -4.079534 | -2.362170 | 0.814065  |
| 16 | 1 | 0 | -2.165405 | -2.136200 | 1.748384  |
| 17 | 6 | 0 | -4.662962 | -0.662102 | -0.791198 |
| 18 | 6 | 0 | -4.987275 | -1.827845 | -0.101858 |
| 19 | 1 | 0 | -4.337037 | -3.242102 | 1.396693  |
| 20 | 1 | 0 | -5.387589 | -0.213801 | -1.467358 |
| 21 | 1 | 0 | -5.953768 | -2.300329 | -0.255044 |
| 22 | 1 | 0 | -0.866457 | -0.081816 | 1.530853  |
| 23 | 6 | 0 | 1.165648  | -0.015802 | -0.460695 |
| 24 | 6 | 0 | 2.481037  | -0.609533 | -0.515533 |
| 25 | 7 | 0 | 0.067430  | -0.728712 | -0.219405 |
| 26 | 6 | 0 | 3.551710  | 0.101176  | -1.091244 |
| 27 | 6 | 0 | 2.702570  | -1.881409 | 0.062100  |
| 28 | 6 | 0 | 0.234177  | -2.185909 | -0.047204 |
| 29 | 6 | 0 | 4.826158  | -0.455305 | -1.105759 |
| 30 | 1 | 0 | 3.367713  | 1.084329  | -1.515992 |
| 31 | 6 | 0 | 3.983444  | -2.422978 | 0.041151  |
| 32 | 6 | 0 | 1.514352  | -2.547085 | 0.712891  |
| 33 | 1 | 0 | -0.647176 | -2.587618 | 0.445507  |
| 34 | 1 | 0 | 0.266254  | -2.624942 | -1.053063 |
| 35 | 6 | 0 | 5.041489  | -1.718001 | -0.544131 |
| 36 | 1 | 0 | 5.651886  | 0.091300  | -1.551524 |
| 37 | 1 | 0 | 4.161838  | -3.400667 | 0.482850  |
| 38 | 1 | 0 | 1.430794  | -2.216913 | 1.759601  |
| 39 | 1 | 0 | 1.630442  | -3.636682 | 0.732413  |
| 40 | 1 | 0 | 6.035514  | -2.156315 | -0.559797 |
| 41 | 1 | 0 | 1.061166  | 1.010572  | -0.792270 |
| 42 | 1 | 0 | 0.167817  | 1.134230  | 2.435098  |
| 43 | 6 | 0 | 1.853983  | 2.535599  | 2.321567  |
| 44 | 1 | 0 | 2.548362  | 2.825619  | 1.526735  |
| 45 | 1 | 0 | 1.589802  | 3.463081  | 2.852759  |
| 46 | 1 | 0 | 2.373883  | 1.885480  | 3.036462  |

8g

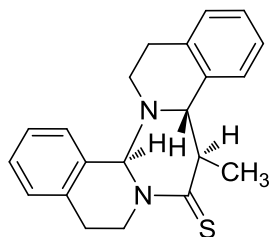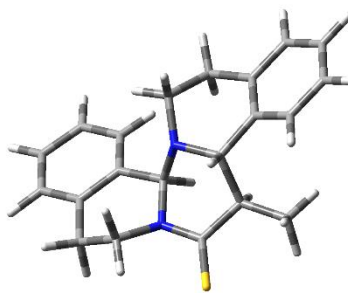

| Center Number | Atomic Number | Atomic Type | Coordinates (Angstroms) |           |           |
|---------------|---------------|-------------|-------------------------|-----------|-----------|
|               |               |             | X                       | Y         | Z         |
| 1             | 6             | 0           | -1.113184               | 1.484518  | -0.741444 |
| 2             | 6             | 0           | 0.145783                | 2.266283  | -0.355397 |
| 3             | 16            | 0           | 0.156933                | 3.918421  | -0.115862 |
| 4             | 7             | 0           | 1.212925                | 1.452478  | -0.117626 |
| 5             | 6             | 0           | 0.987686                | 0.009706  | -0.294989 |
| 6             | 6             | 0           | 2.223874                | 1.827649  | 0.882425  |
| 7             | 6             | 0           | 2.290308                | -0.790656 | -0.212915 |
| 8             | 6             | 0           | 3.583580                | 1.253591  | 0.531868  |
| 9             | 1             | 0           | 2.247376                | 2.914532  | 0.932958  |
| 10            | 1             | 0           | 1.882828                | 1.439693  | 1.853629  |
| 11            | 6             | 0           | 2.303052                | -2.112474 | -0.690392 |
| 12            | 6             | 0           | 3.505408                | -0.214228 | 0.190878  |
| 13            | 1             | 0           | 3.998629                | 1.799564  | -0.327238 |
| 14            | 1             | 0           | 4.272583                | 1.418855  | 1.369170  |
| 15            | 6             | 0           | 3.465059                | -2.877340 | -0.689696 |
| 16            | 1             | 0           | 1.389668                | -2.548277 | -1.083352 |
| 17            | 6             | 0           | 4.671788                | -0.992861 | 0.190376  |
| 18            | 6             | 0           | 4.659091                | -2.317925 | -0.229865 |
| 19            | 1             | 0           | 3.439915                | -3.899790 | -1.056061 |
| 20            | 1             | 0           | 5.604487                | -0.536184 | 0.514343  |
| 21            | 1             | 0           | 5.574092                | -2.903811 | -0.219655 |
| 22            | 1             | 0           | 0.661198                | -0.122081 | -1.336948 |
| 23            | 6             | 0           | -1.331987               | 0.460549  | 0.447987  |
| 24            | 6             | 0           | -2.601117               | -0.379321 | 0.285708  |
| 25            | 7             | 0           | -0.084637               | -0.345120 | 0.661378  |
| 26            | 6             | 0           | -3.851111               | 0.211213  | 0.528779  |
| 27            | 6             | 0           | -2.558186               | -1.744030 | -0.051469 |
| 28            | 6             | 0           | -0.322244               | -1.750255 | 0.971439  |
| 29            | 6             | 0           | -5.035724               | -0.499958 | 0.353604  |
| 30            | 1             | 0           | -3.896251               | 1.243313  | 0.863322  |
| 31            | 6             | 0           | -3.753183               | -2.454548 | -0.219625 |

|    |   |   |           |           |           |
|----|---|---|-----------|-----------|-----------|
| 32 | 6 | 0 | -1.220893 | -2.443468 | -0.067410 |
| 33 | 1 | 0 | 0.637975  | -2.253476 | 1.084479  |
| 34 | 1 | 0 | -0.820104 | -1.801597 | 1.948582  |
| 35 | 6 | 0 | -4.988903 | -1.838083 | -0.042153 |
| 36 | 1 | 0 | -5.990123 | -0.014027 | 0.537398  |
| 37 | 1 | 0 | -3.704904 | -3.512278 | -0.470263 |
| 38 | 1 | 0 | -0.753040 | -2.400236 | -1.061732 |
| 39 | 1 | 0 | -1.348614 | -3.506932 | 0.171864  |
| 40 | 1 | 0 | -5.906388 | -2.404577 | -0.177107 |
| 41 | 1 | 0 | -1.481962 | 1.084497  | 1.342504  |
| 42 | 1 | 0 | -0.906380 | 0.895947  | -1.644474 |
| 43 | 6 | 0 | -2.309377 | 2.374932  | -1.071319 |
| 44 | 1 | 0 | -2.641745 | 2.953768  | -0.205226 |
| 45 | 1 | 0 | -2.023954 | 3.093074  | -1.843847 |
| 46 | 1 | 0 | -3.142556 | 1.774009  | -1.443160 |

1k

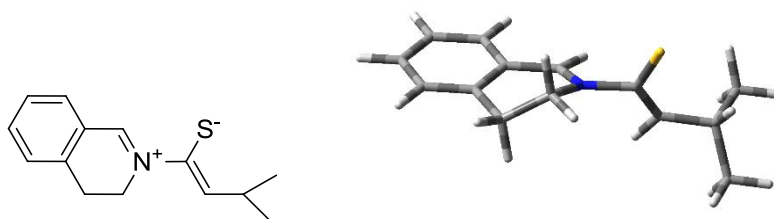

| Center Number | Atomic Number | Atomic Type | Coordinates (Angstroms) |           |           |
|---------------|---------------|-------------|-------------------------|-----------|-----------|
|               |               |             | X                       | Y         | Z         |
| 1             | 6             | 0           | -2.787883               | -1.610337 | -0.776072 |
| 2             | 6             | 0           | -2.029882               | -0.568252 | -0.213171 |
| 3             | 6             | 0           | -2.662888               | 0.448536  | 0.538235  |
| 4             | 6             | 0           | -4.045996               | 0.412664  | 0.691725  |
| 5             | 6             | 0           | -4.796888               | -0.618724 | 0.118783  |
| 6             | 6             | 0           | -4.168621               | -1.632127 | -0.612369 |
| 7             | 1             | 0           | -2.288451               | -2.388214 | -1.347997 |
| 8             | 1             | 0           | -4.542866               | 1.191174  | 1.265278  |
| 9             | 1             | 0           | -5.875636               | -0.632751 | 0.246255  |
| 10            | 1             | 0           | -4.756087               | -2.431862 | -1.053120 |
| 11            | 6             | 0           | -1.771824               | 1.489108  | 1.175568  |
| 12            | 1             | 0           | -1.439984               | 1.130693  | 2.161441  |
| 13            | 1             | 0           | -2.318639               | 2.422332  | 1.347211  |
| 14            | 6             | 0           | -0.594397               | -0.530192 | -0.374585 |
| 15            | 1             | 0           | -0.060215               | -1.383520 | -0.778510 |
| 16            | 7             | 0           | 0.129993                | 0.514399  | -0.067665 |

|    |    |   |           |           |           |
|----|----|---|-----------|-----------|-----------|
| 17 | 6  | 0 | -0.554552 | 1.783276  | 0.299367  |
| 18 | 1  | 0 | 0.185608  | 2.410798  | 0.795642  |
| 19 | 1  | 0 | -0.842719 | 2.283388  | -0.629108 |
| 20 | 6  | 0 | 1.582073  | 0.522978  | -0.274991 |
| 21 | 16 | 0 | 2.120541  | 1.783277  | -1.312557 |
| 22 | 6  | 0 | 2.242128  | -0.454395 | 0.403703  |
| 23 | 1  | 0 | 1.675301  | -1.125254 | 1.050218  |
| 24 | 6  | 0 | 3.730516  | -0.653359 | 0.346439  |
| 25 | 1  | 0 | 4.163562  | 0.269146  | -0.060575 |
| 26 | 6  | 0 | 4.096789  | -1.802772 | -0.616595 |
| 27 | 1  | 0 | 5.185172  | -1.933114 | -0.670389 |
| 28 | 1  | 0 | 3.662748  | -2.754413 | -0.281898 |
| 29 | 1  | 0 | 3.727464  | -1.593816 | -1.625774 |
| 30 | 6  | 0 | 4.311483  | -0.901812 | 1.749048  |
| 31 | 1  | 0 | 3.891050  | -1.812302 | 2.197871  |
| 32 | 1  | 0 | 5.399934  | -1.027964 | 1.704849  |
| 33 | 1  | 0 | 4.094805  | -0.065092 | 2.422658  |

**TS1-endo-k**

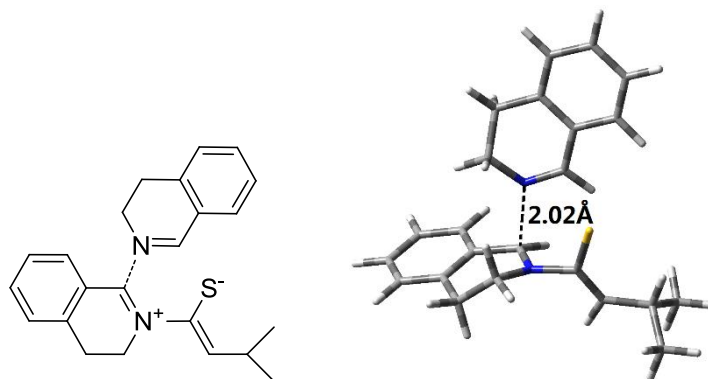

| Center Number | Atomic Number | Atomic Type | Coordinates (Angstroms) |           |           |
|---------------|---------------|-------------|-------------------------|-----------|-----------|
|               |               |             | X                       | Y         | Z         |
| 1             | 6             | 0           | 0.886919                | 3.040680  | -0.283755 |
| 2             | 6             | 0           | 0.442286                | 1.999988  | 0.454755  |
| 3             | 16            | 0           | -1.055664               | 1.775781  | 1.322767  |
| 4             | 7             | 0           | 1.347225                | 0.840211  | 0.511844  |
| 5             | 6             | 0           | 1.366354                | -0.034496 | -0.495542 |
| 6             | 6             | 0           | 1.838763                | 0.399802  | 1.829695  |
| 7             | 6             | 0           | 2.375460                | -1.117765 | -0.493166 |
| 8             | 6             | 0           | 3.241757                | -0.187167 | 1.677445  |
| 9             | 1             | 0           | 1.837655                | 1.272339  | 2.483539  |
| 10            | 1             | 0           | 1.144710                | -0.332303 | 2.258920  |

|    |   |   |           |           |           |
|----|---|---|-----------|-----------|-----------|
| 11 | 6 | 0 | 2.439573  | -2.018777 | -1.565288 |
| 12 | 6 | 0 | 3.298326  | -1.209869 | 0.563807  |
| 13 | 1 | 0 | 3.951538  | 0.623991  | 1.458237  |
| 14 | 1 | 0 | 3.558448  | -0.634561 | 2.626788  |
| 15 | 6 | 0 | 3.412560  | -3.013086 | -1.591980 |
| 16 | 1 | 0 | 1.709557  | -1.939479 | -2.366569 |
| 17 | 6 | 0 | 4.269819  | -2.215309 | 0.525538  |
| 18 | 6 | 0 | 4.329378  | -3.111782 | -0.540652 |
| 19 | 1 | 0 | 3.457465  | -3.708859 | -2.424904 |
| 20 | 1 | 0 | 4.986063  | -2.292831 | 1.340227  |
| 21 | 1 | 0 | 5.089548  | -3.888140 | -0.552353 |
| 22 | 1 | 0 | 1.891338  | 2.976137  | -0.707118 |
| 23 | 1 | 0 | 1.082685  | 0.381941  | -1.456180 |
| 24 | 7 | 0 | -0.354990 | -1.089092 | -0.467330 |
| 25 | 6 | 0 | -1.411574 | -0.352510 | -0.630089 |
| 26 | 6 | 0 | -0.497921 | -2.292011 | 0.356106  |
| 27 | 6 | 0 | -2.770251 | -0.804050 | -0.306591 |
| 28 | 1 | 0 | -1.300685 | 0.571361  | -1.191060 |
| 29 | 6 | 0 | -1.762647 | -3.075030 | -0.011893 |
| 30 | 1 | 0 | 0.394264  | -2.910729 | 0.226415  |
| 31 | 1 | 0 | -0.546528 | -1.984085 | 1.412631  |
| 32 | 6 | 0 | -3.859704 | 0.076714  | -0.360547 |
| 33 | 6 | 0 | -2.970835 | -2.164816 | -0.003821 |
| 34 | 1 | 0 | -1.637877 | -3.516515 | -1.012558 |
| 35 | 1 | 0 | -1.897253 | -3.909765 | 0.685917  |
| 36 | 6 | 0 | -5.145740 | -0.389617 | -0.108110 |
| 37 | 1 | 0 | -3.677953 | 1.128001  | -0.564429 |
| 38 | 6 | 0 | -4.266405 | -2.620431 | 0.244756  |
| 39 | 6 | 0 | -5.348656 | -1.739944 | 0.195535  |
| 40 | 1 | 0 | -5.988105 | 0.295493  | -0.139221 |
| 41 | 1 | 0 | -4.429715 | -3.669595 | 0.481059  |
| 42 | 1 | 0 | -6.351409 | -2.106297 | 0.399012  |
| 43 | 6 | 0 | 0.125310  | 4.311318  | -0.552678 |
| 44 | 1 | 0 | -0.885304 | 4.182067  | -0.148414 |
| 45 | 6 | 0 | 0.018057  | 4.578938  | -2.065909 |
| 46 | 1 | 0 | -0.540946 | 5.501875  | -2.265387 |
| 47 | 1 | 0 | 1.012189  | 4.689273  | -2.520219 |
| 48 | 1 | 0 | -0.493052 | 3.756056  | -2.579303 |
| 49 | 6 | 0 | 0.778978  | 5.507120  | 0.167393  |
| 50 | 1 | 0 | 1.809544  | 5.662823  | -0.179210 |
| 51 | 1 | 0 | 0.221170  | 6.433487  | -0.021026 |
| 52 | 1 | 0 | 0.808781  | 5.340581  | 1.249293  |

---

**C-endo-k**

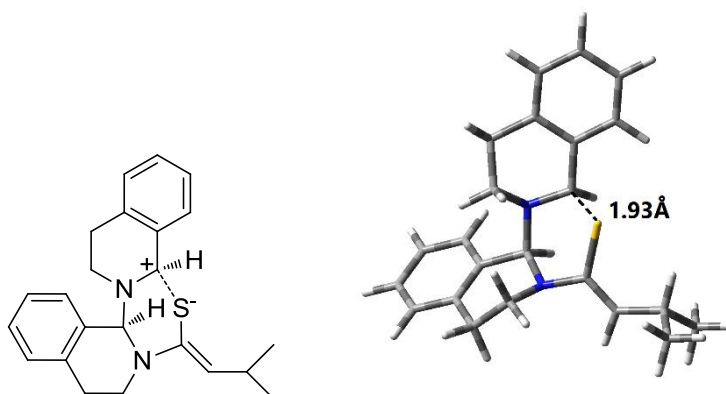

| Center Number | Atomic Number | Atomic Type | Coordinates (Angstroms) |           |           |
|---------------|---------------|-------------|-------------------------|-----------|-----------|
|               |               |             | X                       | Y         | Z         |
| 1             | 6             | 0           | -0.098613               | 3.271056  | 0.218437  |
| 2             | 6             | 0           | -0.013008               | 1.969763  | -0.103437 |
| 3             | 16            | 0           | 1.551107                | 1.178298  | -0.557381 |
| 4             | 7             | 0           | -1.194406               | 1.173045  | -0.165056 |
| 5             | 6             | 0           | -1.132503               | -0.084575 | 0.583184  |
| 6             | 6             | 0           | -1.878507               | 1.108522  | -1.462886 |
| 7             | 6             | 0           | -2.459886               | -0.827266 | 0.537515  |
| 8             | 6             | 0           | -3.348244               | 0.770226  | -1.217278 |
| 9             | 1             | 0           | -1.788834               | 2.091366  | -1.932677 |
| 10            | 1             | 0           | -1.423604               | 0.378000  | -2.150645 |
| 11            | 6             | 0           | -2.631838               | -1.933136 | 1.381996  |
| 12            | 6             | 0           | -3.504780               | -0.432314 | -0.311229 |
| 13            | 1             | 0           | -3.833684               | 1.639300  | -0.751527 |
| 14            | 1             | 0           | -3.860083               | 0.593370  | -2.171854 |
| 15            | 6             | 0           | -3.828195               | -2.643687 | 1.395057  |
| 16            | 1             | 0           | -1.808260               | -2.234748 | 2.023732  |
| 17            | 6             | 0           | -4.704193               | -1.159209 | -0.292651 |
| 18            | 6             | 0           | -4.871870               | -2.253416 | 0.550996  |
| 19            | 1             | 0           | -3.947825               | -3.496362 | 2.057976  |
| 20            | 1             | 0           | -5.513227               | -0.857173 | -0.954580 |
| 21            | 1             | 0           | -5.809799               | -2.802562 | 0.549144  |
| 22            | 1             | 0           | -1.104148               | 3.642958  | 0.424243  |
| 23            | 1             | 0           | -0.941253               | 0.207378  | 1.625278  |
| 24            | 7             | 0           | -0.012664               | -0.998832 | 0.260401  |
| 25            | 6             | 0           | 1.262714                | -0.403920 | 0.512450  |
| 26            | 6             | 0           | -0.052724               | -1.762294 | -0.991765 |
| 27            | 6             | 0           | 2.428552                | -1.336154 | 0.283791  |
| 28            | 1             | 0           | 1.275719                | -0.024438 | 1.539139  |
| 29            | 6             | 0           | 0.874476                | -2.970660 | -0.856248 |



|    |   |   |           |           |           |
|----|---|---|-----------|-----------|-----------|
| 30 | 1 | 0 | -1.079024 | -2.090678 | -1.167530 |
| 31 | 1 | 0 | 0.261997  | -1.146666 | -1.849667 |
| 32 | 6 | 0 | 3.701441  | -0.973095 | 0.745056  |
| 33 | 6 | 0 | 2.250989  | -2.561028 | -0.378620 |
| 34 | 1 | 0 | 0.431873  | -3.678292 | -0.141223 |
| 35 | 1 | 0 | 0.948047  | -3.494556 | -1.817709 |
| 36 | 6 | 0 | 4.794442  | -1.813556 | 0.555272  |
| 37 | 1 | 0 | 3.830038  | -0.019083 | 1.250625  |
| 38 | 6 | 0 | 3.359216  | -3.397456 | -0.564840 |
| 39 | 6 | 0 | 4.622263  | -3.032946 | -0.105287 |
| 40 | 1 | 0 | 5.775203  | -1.519928 | 0.919256  |
| 41 | 1 | 0 | 3.223380  | -4.345754 | -1.080867 |
| 42 | 1 | 0 | 5.469769  | -3.694887 | -0.262584 |
| 43 | 6 | 0 | 1.010897  | 4.285515  | 0.301309  |
| 44 | 1 | 0 | 1.969871  | 3.759688  | 0.225958  |
| 45 | 6 | 0 | 0.963579  | 5.018664  | 1.654862  |
| 46 | 1 | 0 | 1.771581  | 5.756493  | 1.726252  |
| 47 | 1 | 0 | 0.012511  | 5.552174  | 1.781546  |
| 48 | 1 | 0 | 1.067905  | 4.317426  | 2.490078  |
| 49 | 6 | 0 | 0.922888  | 5.287548  | -0.867678 |
| 50 | 1 | 0 | -0.031682 | 5.829204  | -0.852175 |
| 51 | 1 | 0 | 1.728491  | 6.029197  | -0.804352 |
| 52 | 1 | 0 | 1.004229  | 4.776836  | -1.833209 |

**TS2-Si-k**

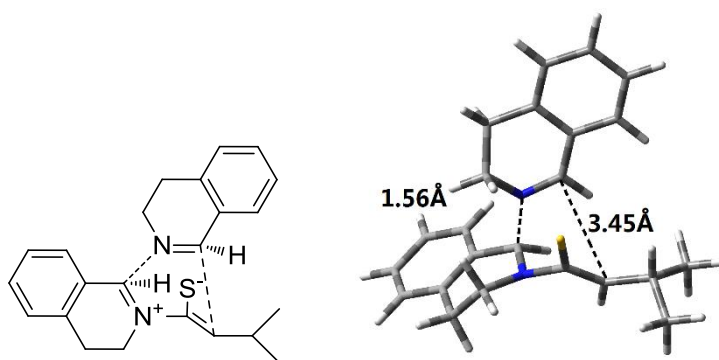

| Center Number | Atomic Number | Atomic Type | Coordinates (Angstroms) |          |           |
|---------------|---------------|-------------|-------------------------|----------|-----------|
|               |               |             | X                       | Y        | Z         |
| 1             | 6             | 0           | -0.662202               | 2.641005 | -0.486022 |
| 2             | 6             | 0           | -0.295487               | 1.852447 | 0.560688  |
| 3             | 16            | 0           | -1.244729               | 1.385379 | 1.953316  |
| 4             | 7             | 0           | 1.049991                | 1.283301 | 0.462778  |
| 5             | 6             | 0           | 1.233247                | 0.277103 | -0.512215 |

|    |   |   |           |           |           |
|----|---|---|-----------|-----------|-----------|
| 6  | 6 | 0 | 1.881417  | 1.235080  | 1.669307  |
| 7  | 6 | 0 | 2.634194  | -0.294624 | -0.593472 |
| 8  | 6 | 0 | 3.352702  | 1.261544  | 1.255643  |
| 9  | 1 | 0 | 1.623139  | 2.110036  | 2.266570  |
| 10 | 1 | 0 | 1.672846  | 0.359239  | 2.298858  |
| 11 | 6 | 0 | 2.913012  | -1.280770 | -1.549727 |
| 12 | 6 | 0 | 3.656100  | 0.182673  | 0.241304  |
| 13 | 1 | 0 | 3.584571  | 2.244863  | 0.822829  |
| 14 | 1 | 0 | 3.994446  | 1.141357  | 2.137212  |
| 15 | 6 | 0 | 4.196947  | -1.801957 | -1.680453 |
| 16 | 1 | 0 | 2.114185  | -1.640554 | -2.194437 |
| 17 | 6 | 0 | 4.944254  | -0.351461 | 0.100285  |
| 18 | 6 | 0 | 5.217811  | -1.333211 | -0.848769 |
| 19 | 1 | 0 | 4.402016  | -2.565200 | -2.425871 |
| 20 | 1 | 0 | 5.738396  | 0.011341  | 0.748836  |
| 21 | 1 | 0 | 6.223700  | -1.734167 | -0.940217 |
| 22 | 1 | 0 | 0.097542  | 2.890957  | -1.230756 |
| 23 | 1 | 0 | 0.924113  | 0.648505  | -1.494520 |
| 24 | 7 | 0 | 0.212769  | -0.882572 | -0.288103 |
| 25 | 6 | 0 | -0.956776 | -0.779792 | -0.858214 |
| 26 | 6 | 0 | 0.322939  | -1.682785 | 0.950537  |
| 27 | 6 | 0 | -2.095922 | -1.583656 | -0.485120 |
| 28 | 1 | 0 | -1.053018 | -0.045541 | -1.652344 |
| 29 | 6 | 0 | -0.493942 | -2.969004 | 0.844250  |
| 30 | 1 | 0 | 1.379647  | -1.897666 | 1.114788  |
| 31 | 1 | 0 | -0.062096 | -1.028113 | 1.751934  |
| 32 | 6 | 0 | -3.369890 | -1.290655 | -0.998300 |
| 33 | 6 | 0 | -1.904389 | -2.681585 | 0.381637  |
| 34 | 1 | 0 | -0.012209 | -3.665807 | 0.141230  |
| 35 | 1 | 0 | -0.499198 | -3.461620 | 1.822181  |
| 36 | 6 | 0 | -4.458100 | -2.079208 | -0.640468 |
| 37 | 1 | 0 | -3.500062 | -0.433484 | -1.653291 |
| 38 | 6 | 0 | -3.000967 | -3.467160 | 0.721364  |
| 39 | 6 | 0 | -4.271117 | -3.165968 | 0.218201  |
| 40 | 1 | 0 | -5.447724 | -1.847267 | -1.021687 |
| 41 | 1 | 0 | -2.869473 | -4.315434 | 1.388283  |
| 42 | 1 | 0 | -5.119586 | -3.782316 | 0.502163  |
| 43 | 6 | 0 | -2.005937 | 3.304592  | -0.643682 |
| 44 | 1 | 0 | -2.722660 | 2.746729  | -0.028527 |
| 45 | 6 | 0 | -2.480637 | 3.276435  | -2.107727 |
| 46 | 1 | 0 | -3.461176 | 3.756248  | -2.219151 |
| 47 | 1 | 0 | -1.777527 | 3.807728  | -2.763899 |
| 48 | 1 | 0 | -2.566963 | 2.248022  | -2.484387 |
| 49 | 6 | 0 | -1.973253 | 4.752163  | -0.111418 |

|    |   |   |           |          |           |
|----|---|---|-----------|----------|-----------|
| 50 | 1 | 0 | -1.247619 | 5.361108 | -0.667143 |
| 51 | 1 | 0 | -2.956391 | 5.233375 | -0.204900 |
| 52 | 1 | 0 | -1.686568 | 4.759249 | 0.944692  |

7k

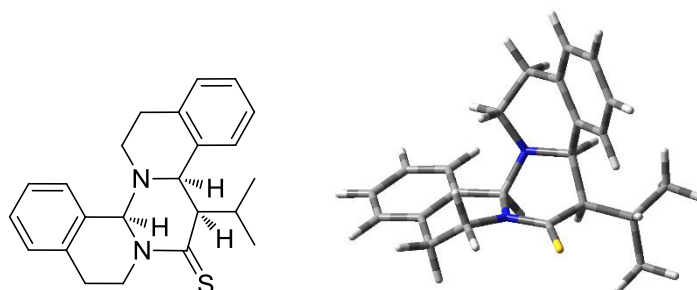

| Center Number | Atomic Number | Atomic Type | Coordinates (Angstroms) |           |           |
|---------------|---------------|-------------|-------------------------|-----------|-----------|
|               |               |             | X                       | Y         | Z         |
| 1             | 6             | 0           | 1.101624                | 1.264693  | 0.854786  |
| 2             | 6             | 0           | 0.482897                | 1.615410  | -0.505238 |
| 3             | 16            | 0           | 1.269953                | 2.477254  | -1.707673 |
| 4             | 7             | 0           | -0.756508               | 1.074751  | -0.640773 |
| 5             | 6             | 0           | -1.282541               | 0.320237  | 0.524681  |
| 6             | 6             | 0           | -1.472986               | 1.031497  | -1.918628 |
| 7             | 6             | 0           | -2.740810               | -0.091491 | 0.383348  |
| 8             | 6             | 0           | -2.959270               | 1.297223  | -1.709839 |
| 9             | 1             | 0           | -1.019661               | 1.777071  | -2.571804 |
| 10            | 1             | 0           | -1.321182               | 0.044167  | -2.377112 |
| 11            | 6             | 0           | -3.316150               | -0.864087 | 1.404033  |
| 12            | 6             | 0           | -3.548738               | 0.390893  | -0.655638 |
| 13            | 1             | 0           | -3.095745               | 2.348138  | -1.416688 |
| 14            | 1             | 0           | -3.485383               | 1.168295  | -2.663105 |
| 15            | 6             | 0           | -4.668081               | -1.191221 | 1.375628  |
| 16            | 1             | 0           | -2.687825               | -1.204567 | 2.222511  |
| 17            | 6             | 0           | -4.908506               | 0.049336  | -0.676870 |
| 18            | 6             | 0           | -5.469287               | -0.737886 | 0.323835  |
| 19            | 1             | 0           | -5.095851               | -1.795513 | 2.170795  |
| 20            | 1             | 0           | -5.529373               | 0.414624  | -1.491922 |
| 21            | 1             | 0           | -6.524906               | -0.993099 | 0.288679  |
| 22            | 1             | 0           | 0.392698                | 1.591789  | 1.625734  |
| 23            | 1             | 0           | -1.293528               | 1.036001  | 1.352820  |
| 24            | 7             | 0           | -0.373425               | -0.758470 | 0.914856  |
| 25            | 6             | 0           | 1.066981                | -0.302044 | 0.985395  |
| 26            | 6             | 0           | -0.598041               | -2.049420 | 0.249350  |

|    |   |   |           |           |           |
|----|---|---|-----------|-----------|-----------|
| 27 | 6 | 0 | 2.004180  | -1.107752 | 0.071946  |
| 28 | 1 | 0 | 1.396944  | -0.516988 | 2.010091  |
| 29 | 6 | 0 | 0.521418  | -3.020115 | 0.627631  |
| 30 | 1 | 0 | -1.564589 | -2.442605 | 0.571635  |
| 31 | 1 | 0 | -0.628916 | -1.966115 | -0.851066 |
| 32 | 6 | 0 | 3.096815  | -0.575084 | -0.622527 |
| 33 | 6 | 0 | 1.794234  | -2.500211 | 0.017834  |
| 34 | 1 | 0 | 0.581647  | -3.085016 | 1.724232  |
| 35 | 1 | 0 | 0.291388  | -4.024261 | 0.255218  |
| 36 | 6 | 0 | 3.979724  | -1.404325 | -1.318961 |
| 37 | 1 | 0 | 3.260618  | 0.492313  | -0.653995 |
| 38 | 6 | 0 | 2.677206  | -3.323250 | -0.682580 |
| 39 | 6 | 0 | 3.781901  | -2.782813 | -1.340562 |
| 40 | 1 | 0 | 4.817519  | -0.961959 | -1.851075 |
| 41 | 1 | 0 | 2.487385  | -4.393839 | -0.721764 |
| 42 | 1 | 0 | 4.467176  | -3.430223 | -1.881320 |
| 43 | 6 | 0 | 2.403603  | 2.018039  | 1.244089  |
| 44 | 1 | 0 | 3.057190  | 2.086261  | 0.371392  |
| 45 | 6 | 0 | 3.171701  | 1.333485  | 2.385699  |
| 46 | 1 | 0 | 4.035837  | 1.945608  | 2.668045  |
| 47 | 1 | 0 | 2.547885  | 1.220489  | 3.282505  |
| 48 | 1 | 0 | 3.546940  | 0.344660  | 2.103594  |
| 49 | 6 | 0 | 2.054636  | 3.462746  | 1.645866  |
| 50 | 1 | 0 | 1.433853  | 3.480432  | 2.552405  |
| 51 | 1 | 0 | 2.967442  | 4.030912  | 1.858519  |
| 52 | 1 | 0 | 1.517666  | 3.980239  | 0.846198  |

4k

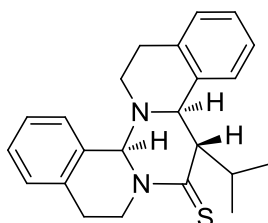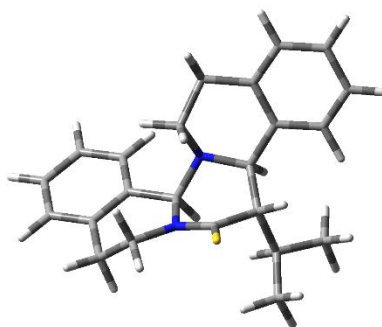

| Center Number | Atomic Number | Atomic Type | Coordinates (Angstroms) |          |           |
|---------------|---------------|-------------|-------------------------|----------|-----------|
|               |               |             | X                       | Y        | Z         |
| 1             | 6             | 0           | 1.184515                | 1.368753 | 0.276350  |
| 2             | 6             | 0           | 0.131622                | 1.648709 | -0.794096 |

|    |    |   |           |           |           |
|----|----|---|-----------|-----------|-----------|
| 3  | 16 | 0 | 0.515338  | 2.527542  | -2.168608 |
| 4  | 7  | 0 | -1.102926 | 1.151192  | -0.530220 |
| 5  | 6  | 0 | -1.183765 | 0.038466  | 0.476786  |
| 6  | 6  | 0 | -2.221023 | 1.389550  | -1.448273 |
| 7  | 6  | 0 | -2.529506 | -0.675649 | 0.482790  |
| 8  | 6  | 0 | -3.551960 | 1.274542  | -0.710480 |
| 9  | 1  | 0 | -2.084160 | 2.384772  | -1.873734 |
| 10 | 1  | 0 | -2.178516 | 0.675410  | -2.283137 |
| 11 | 6  | 0 | -2.628539 | -1.921159 | 1.117233  |
| 12 | 6  | 0 | -3.680663 | -0.068775 | -0.038547 |
| 13 | 1  | 0 | -3.622458 | 2.084228  | 0.030485  |
| 14 | 1  | 0 | -4.370511 | 1.429051  | -1.422565 |
| 15 | 6  | 0 | -3.858039 | -2.567600 | 1.220967  |
| 16 | 1  | 0 | -1.728367 | -2.375314 | 1.519082  |
| 17 | 6  | 0 | -4.910369 | -0.729811 | 0.066561  |
| 18 | 6  | 0 | -5.005006 | -1.970384 | 0.692824  |
| 19 | 1  | 0 | -3.920348 | -3.535385 | 1.711028  |
| 20 | 1  | 0 | -5.799003 | -0.262580 | -0.351998 |
| 21 | 1  | 0 | -5.966853 | -2.470863 | 0.765155  |
| 22 | 1  | 0 | -1.067159 | 0.494186  | 1.467895  |
| 23 | 7  | 0 | -0.060043 | -0.861852 | 0.314673  |
| 24 | 6  | 0 | 1.184907  | -0.167594 | 0.701093  |
| 25 | 6  | 0 | -0.008366 | -1.521823 | -0.998796 |
| 26 | 6  | 0 | 2.433573  | -0.924871 | 0.247884  |
| 27 | 1  | 0 | 1.188941  | -0.181498 | 1.799406  |
| 28 | 6  | 0 | 1.014045  | -2.647815 | -0.935257 |
| 29 | 1  | 0 | -1.003692 | -1.919566 | -1.214163 |
| 30 | 1  | 0 | 0.257769  | -0.824539 | -1.809999 |
| 31 | 6  | 0 | 3.699411  | -0.450815 | 0.626895  |
| 32 | 6  | 0 | 2.356996  | -2.112686 | -0.498855 |
| 33 | 1  | 0 | 0.660299  | -3.411590 | -0.228617 |
| 34 | 1  | 0 | 1.100553  | -3.132869 | -1.915206 |
| 35 | 6  | 0 | 4.863482  | -1.131278 | 0.281570  |
| 36 | 1  | 0 | 3.779533  | 0.464732  | 1.203308  |
| 37 | 6  | 0 | 3.534879  | -2.787305 | -0.847326 |
| 38 | 6  | 0 | 4.783271  | -2.310522 | -0.461396 |
| 39 | 1  | 0 | 5.829229  | -0.739562 | 0.589335  |
| 40 | 1  | 0 | 3.461111  | -3.698875 | -1.436832 |
| 41 | 1  | 0 | 5.685153  | -2.847312 | -0.743012 |
| 42 | 1  | 0 | 2.144516  | 1.612437  | -0.181407 |
| 43 | 6  | 0 | 1.004399  | 2.327828  | 1.509982  |
| 44 | 1  | 0 | 0.109153  | 2.009989  | 2.063764  |
| 45 | 6  | 0 | 0.798305  | 3.796350  | 1.105771  |
| 46 | 1  | 0 | 0.719210  | 4.420020  | 2.004230  |

|    |   |   |           |          |          |
|----|---|---|-----------|----------|----------|
| 47 | 1 | 0 | 1.639849  | 4.165401 | 0.508922 |
| 48 | 1 | 0 | -0.109192 | 3.941244 | 0.514203 |
| 49 | 6 | 0 | 2.197187  | 2.237661 | 2.476402 |
| 50 | 1 | 0 | 3.118698  | 2.581245 | 1.989607 |
| 51 | 1 | 0 | 2.024849  | 2.883419 | 3.344949 |
| 52 | 1 | 0 | 2.370641  | 1.225142 | 2.855367 |

**TS1-*exo-k***

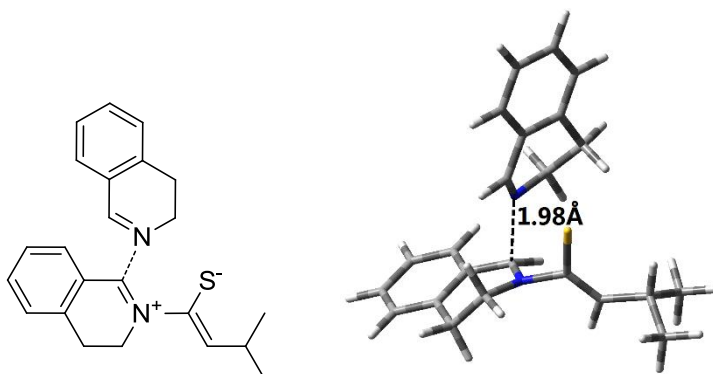

| Center Number | Atomic Number | Atomic Type | Coordinates (Angstroms) |           |           |
|---------------|---------------|-------------|-------------------------|-----------|-----------|
|               |               |             | X                       | Y         | Z         |
| 1             | 6             | 0           | -0.449609               | 2.985300  | 0.209225  |
| 2             | 6             | 0           | -0.204686               | 1.876597  | -0.521728 |
| 3             | 16            | 0           | 1.208504                | 1.413616  | -1.441795 |
| 4             | 7             | 0           | -1.280582               | 0.875918  | -0.551360 |
| 5             | 6             | 0           | -1.434435               | 0.044296  | 0.486259  |
| 6             | 6             | 0           | -1.875073               | 0.536565  | -1.858267 |
| 7             | 6             | 0           | -2.545256               | -0.943291 | 0.452314  |
| 8             | 6             | 0           | -3.340529               | 0.157616  | -1.662004 |
| 9             | 1             | 0           | -1.767749               | 1.417554  | -2.491890 |
| 10            | 1             | 0           | -1.323834               | -0.278539 | -2.339635 |
| 11            | 6             | 0           | -2.691305               | -1.879566 | 1.485240  |
| 12            | 6             | 0           | -3.487684               | -0.897067 | -0.589897 |
| 13            | 1             | 0           | -3.910206               | 1.053607  | -1.375122 |
| 14            | 1             | 0           | -3.761237               | -0.195211 | -2.610620 |
| 15            | 6             | 0           | -3.757629               | -2.772336 | 1.484540  |
| 16            | 1             | 0           | -1.954738               | -1.912245 | 2.283045  |
| 17            | 6             | 0           | -4.554206               | -1.802648 | -0.581458 |
| 18            | 6             | 0           | -4.691456               | -2.735299 | 0.444382  |
| 19            | 1             | 0           | -3.860498               | -3.496722 | 2.287420  |
| 20            | 1             | 0           | -5.282417               | -1.772381 | -1.388626 |
| 21            | 1             | 0           | -5.523959               | -3.433553 | 0.434126  |

|    |   |   |           |           |           |
|----|---|---|-----------|-----------|-----------|
| 22 | 1 | 0 | -1.438615 | 3.094727  | 0.659289  |
| 23 | 1 | 0 | -1.198817 | 0.489023  | 1.448399  |
| 24 | 7 | 0 | 0.197023  | -1.062592 | 0.677589  |
| 25 | 6 | 0 | 0.879770  | -1.271859 | -0.409275 |
| 26 | 6 | 0 | 0.922077  | -0.987840 | 1.952315  |
| 27 | 6 | 0 | 2.300981  | -1.628350 | -0.410656 |
| 28 | 1 | 0 | 0.324812  | -1.375973 | -1.335276 |
| 29 | 6 | 0 | 2.369796  | -0.503802 | 1.798107  |
| 30 | 1 | 0 | 0.369278  | -0.319113 | 2.622936  |
| 31 | 1 | 0 | 0.900945  | -1.987854 | 2.411446  |
| 32 | 6 | 0 | 2.884188  | -2.308381 | -1.486603 |
| 33 | 6 | 0 | 3.068659  | -1.298828 | 0.723371  |
| 34 | 1 | 0 | 2.359650  | 0.553553  | 1.497911  |
| 35 | 1 | 0 | 2.893477  | -0.575868 | 2.758103  |
| 36 | 6 | 0 | 4.228459  | -2.671254 | -1.434573 |
| 37 | 1 | 0 | 2.283446  | -2.547862 | -2.360596 |
| 38 | 6 | 0 | 4.411858  | -1.663448 | 0.763224  |
| 39 | 6 | 0 | 4.990770  | -2.350303 | -0.308731 |
| 40 | 1 | 0 | 4.681781  | -3.199085 | -2.268790 |
| 41 | 1 | 0 | 5.012890  | -1.406649 | 1.632517  |
| 42 | 1 | 0 | 6.039464  | -2.631800 | -0.265014 |
| 43 | 6 | 0 | 0.521702  | 4.114006  | 0.431800  |
| 44 | 1 | 0 | 1.497105  | 3.789311  | 0.050632  |
| 45 | 6 | 0 | 0.662071  | 4.432266  | 1.931867  |
| 46 | 1 | 0 | 1.375684  | 5.248986  | 2.097943  |
| 47 | 1 | 0 | -0.300075 | 4.740524  | 2.363322  |
| 48 | 1 | 0 | 1.013122  | 3.557161  | 2.491361  |
| 49 | 6 | 0 | 0.099219  | 5.369193  | -0.357140 |
| 50 | 1 | 0 | -0.888688 | 5.725787  | -0.035720 |
| 51 | 1 | 0 | 0.814068  | 6.188477  | -0.206469 |
| 52 | 1 | 0 | 0.047875  | 5.153598  | -1.429446 |

---

**C-*exo*-k**

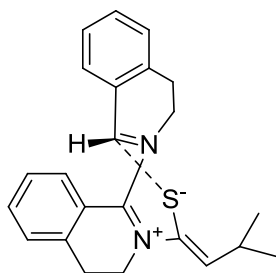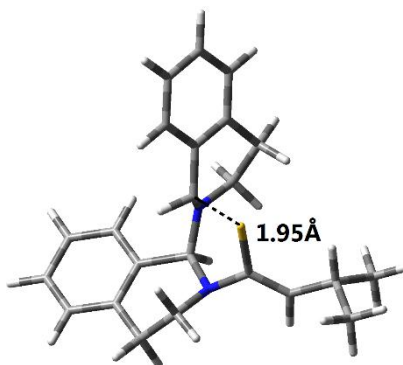

| Center<br>Number | Atomic<br>Number | Atomic<br>Type | Coordinates (Angstroms) |           |           |
|------------------|------------------|----------------|-------------------------|-----------|-----------|
|                  |                  |                | X                       | Y         | Z         |
| 1                | 6                | 0              | 1.643090                | 2.709402  | 0.233830  |
| 2                | 6                | 0              | 0.873146                | 1.727248  | -0.260723 |
| 3                | 16               | 0              | 1.529356                | 0.333829  | -1.207143 |
| 4                | 7                | 0              | -0.545199               | 1.764120  | -0.101278 |
| 5                | 6                | 0              | -1.074516               | 0.694133  | 0.772576  |
| 6                | 6                | 0              | -1.279296               | 2.072076  | -1.334998 |
| 7                | 6                | 0              | -2.557889               | 0.402138  | 0.516528  |
| 8                | 6                | 0              | -2.725367               | 2.408676  | -0.987098 |
| 9                | 1                | 0              | -0.781723               | 2.932077  | -1.792982 |
| 10               | 1                | 0              | -1.252563               | 1.251540  | -2.072695 |
| 11               | 6                | 0              | -3.138487               | -0.706933 | 1.146716  |
| 12               | 6                | 0              | -3.360511               | 1.243648  | -0.268983 |
| 13               | 1                | 0              | -2.736642               | 3.307361  | -0.354433 |
| 14               | 1                | 0              | -3.287339               | 2.647220  | -1.898222 |
| 15               | 6                | 0              | -4.497937               | -0.976123 | 1.014641  |
| 16               | 1                | 0              | -2.508820               | -1.368860 | 1.733647  |
| 17               | 6                | 0              | -4.726288               | 0.959774  | -0.403038 |
| 18               | 6                | 0              | -5.298877               | -0.135685 | 0.237309  |
| 19               | 1                | 0              | -4.930193               | -1.841064 | 1.510698  |
| 20               | 1                | 0              | -5.340273               | 1.606285  | -1.026598 |
| 21               | 1                | 0              | -6.360034               | -0.340605 | 0.122273  |
| 22               | 1                | 0              | 1.114150                | 3.521774  | 0.734396  |
| 23               | 1                | 0              | -0.993005               | 1.063914  | 1.804448  |
| 24               | 7                | 0              | -0.270945               | -0.539372 | 0.752237  |
| 25               | 6                | 0              | 0.205708                | -0.929555 | -0.529749 |
| 26               | 6                | 0              | 0.527982                | -0.851482 | 1.948888  |
| 27               | 6                | 0              | 0.818410                | -2.301056 | -0.534710 |
| 28               | 1                | 0              | -0.617620               | -0.871988 | -1.245234 |
| 29               | 6                | 0              | 1.818385                | -1.630277 | 1.635815  |
| 30               | 1                | 0              | 0.791531                | 0.075651  | 2.474617  |
| 31               | 1                | 0              | -0.088704               | -1.446486 | 2.639176  |
| 32               | 6                | 0              | 0.613275                | -3.197824 | -1.584846 |
| 33               | 6                | 0              | 1.604374                | -2.672123 | 0.567504  |
| 34               | 1                | 0              | 2.583179                | -0.924418 | 1.287977  |
| 35               | 1                | 0              | 2.192930                | -2.084292 | 2.560168  |
| 36               | 6                | 0              | 1.188452                | -4.469400 | -1.543422 |
| 37               | 1                | 0              | -0.001529               | -2.903651 | -2.432421 |
| 38               | 6                | 0              | 2.164076                | -3.949734 | 0.608107  |
| 39               | 6                | 0              | 1.961513                | -4.845948 | -0.444390 |
| 40               | 1                | 0              | 1.025535                | -5.165127 | -2.361956 |



|    |   |   |          |           |           |
|----|---|---|----------|-----------|-----------|
| 41 | 1 | 0 | 2.766013 | -4.244002 | 1.465119  |
| 42 | 1 | 0 | 2.404140 | -5.837671 | -0.403305 |
| 43 | 6 | 0 | 3.141669 | 2.834049  | 0.150399  |
| 44 | 1 | 0 | 3.548780 | 1.883961  | -0.217884 |
| 45 | 6 | 0 | 3.737757 | 3.109319  | 1.543217  |
| 46 | 1 | 0 | 4.829750 | 3.193369  | 1.490779  |
| 47 | 1 | 0 | 3.350649 | 4.048848  | 1.958824  |
| 48 | 1 | 0 | 3.492125 | 2.306077  | 2.246982  |
| 49 | 6 | 0 | 3.544461 | 3.940078  | -0.845949 |
| 50 | 1 | 0 | 3.146509 | 4.914397  | -0.534639 |
| 51 | 1 | 0 | 4.636029 | 4.029111  | -0.907538 |
| 52 | 1 | 0 | 3.161653 | 3.725684  | -1.849361 |

**TS2-Re-k**

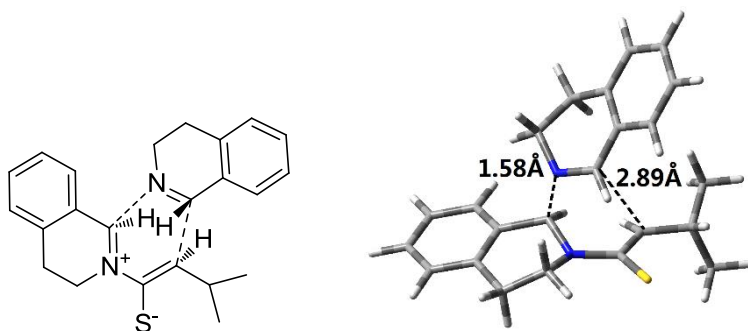

| Center Number | Atomic Number | Atomic Type | Coordinates (Angstroms) |           |           |
|---------------|---------------|-------------|-------------------------|-----------|-----------|
|               |               |             | X                       | Y         | Z         |
| 1             | 6             | 0           | 0.805120                | 1.802064  | 1.012173  |
| 2             | 6             | 0           | 0.067856                | 2.040595  | -0.136311 |
| 3             | 16            | 0           | 0.607661                | 3.088526  | -1.393308 |
| 4             | 7             | 0           | -1.144932               | 1.277342  | -0.334010 |
| 5             | 6             | 0           | -1.296509               | 0.034081  | 0.335195  |
| 6             | 6             | 0           | -1.815644               | 1.304603  | -1.644872 |
| 7             | 6             | 0           | -2.726630               | -0.484727 | 0.347878  |
| 8             | 6             | 0           | -3.320198               | 1.133936  | -1.489583 |
| 9             | 1             | 0           | -1.567942               | 2.252109  | -2.119679 |
| 10            | 1             | 0           | -1.417600               | 0.502931  | -2.287920 |
| 11            | 6             | 0           | -3.137977               | -1.374977 | 1.352757  |
| 12            | 6             | 0           | -3.680988               | 0.001192  | -0.560230 |
| 13            | 1             | 0           | -3.748487               | 2.061463  | -1.083498 |
| 14            | 1             | 0           | -3.774207               | 0.985927  | -2.477477 |
| 15            | 6             | 0           | -4.441850               | -1.862719 | 1.398456  |
| 16            | 1             | 0           | -2.441398               | -1.665357 | 2.135578  |
| 17            | 6             | 0           | -4.988632               | -0.497535 | -0.510007 |

|    |   |   |           |           |           |
|----|---|---|-----------|-----------|-----------|
| 18 | 6 | 0 | -5.368093 | -1.437353 | 0.444805  |
| 19 | 1 | 0 | -4.735366 | -2.555130 | 2.182302  |
| 20 | 1 | 0 | -5.720898 | -0.122861 | -1.221802 |
| 21 | 1 | 0 | -6.387802 | -1.812270 | 0.465292  |
| 22 | 1 | 0 | -0.966208 | 0.118914  | 1.370799  |
| 23 | 6 | 0 | 0.874621  | -0.503663 | -0.730169 |
| 24 | 6 | 0 | 2.117492  | -1.241838 | -0.740802 |
| 25 | 7 | 0 | -0.253841 | -1.009878 | -0.231822 |
| 26 | 6 | 0 | 3.173512  | -0.835613 | -1.578821 |
| 27 | 6 | 0 | 2.287492  | -2.341223 | 0.132235  |
| 28 | 6 | 0 | -0.193114 | -2.382366 | 0.310492  |
| 29 | 6 | 0 | 4.381266  | -1.524908 | -1.556981 |
| 30 | 1 | 0 | 3.032523  | 0.020415  | -2.233220 |
| 31 | 6 | 0 | 3.502285  | -3.018578 | 0.143863  |
| 32 | 6 | 0 | 1.125154  | -2.671096 | 1.035842  |
| 33 | 1 | 0 | -1.047126 | -2.544042 | 0.962517  |
| 34 | 1 | 0 | -0.305413 | -3.068497 | -0.539224 |
| 35 | 6 | 0 | 4.545002  | -2.617284 | -0.698984 |
| 36 | 1 | 0 | 5.195554  | -1.213116 | -2.204296 |
| 37 | 1 | 0 | 3.640685  | -3.864445 | 0.813203  |
| 38 | 1 | 0 | 1.184623  | -2.064411 | 1.952172  |
| 39 | 1 | 0 | 1.147581  | -3.721582 | 1.347022  |
| 40 | 1 | 0 | 5.486621  | -3.159080 | -0.684367 |
| 41 | 1 | 0 | 0.824416  | 0.405010  | -1.317533 |
| 42 | 1 | 0 | 0.344153  | 1.282829  | 1.852128  |
| 43 | 6 | 0 | 2.121651  | 2.453579  | 1.348308  |
| 44 | 1 | 0 | 2.650987  | 2.651812  | 0.409266  |
| 45 | 6 | 0 | 1.903356  | 3.813122  | 2.047646  |
| 46 | 1 | 0 | 2.864509  | 4.287491  | 2.286298  |
| 47 | 1 | 0 | 1.337283  | 4.486616  | 1.397841  |
| 48 | 1 | 0 | 1.347839  | 3.688576  | 2.986644  |
| 49 | 6 | 0 | 2.983117  | 1.525536  | 2.222152  |
| 50 | 1 | 0 | 3.947063  | 1.992440  | 2.457833  |
| 51 | 1 | 0 | 2.485094  | 1.303377  | 3.176445  |
| 52 | 1 | 0 | 3.182617  | 0.573249  | 1.717167  |

---

8k

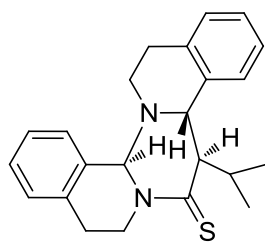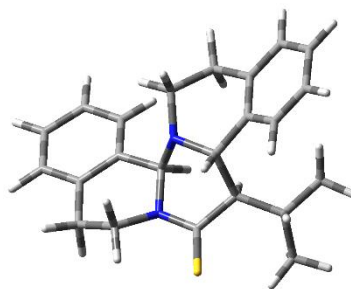

| Center Number | Atomic Number | Atomic Type | Coordinates (Angstroms) |           |           |
|---------------|---------------|-------------|-------------------------|-----------|-----------|
|               |               |             | X                       | Y         | Z         |
| 1             | 6             | 0           | 1.023990                | 1.198733  | 0.548217  |
| 2             | 6             | 0           | -0.080100               | 2.073965  | -0.058529 |
| 3             | 16            | 0           | 0.213090                | 3.536148  | -0.817349 |
| 4             | 7             | 0           | -1.274853               | 1.412831  | -0.130567 |
| 5             | 6             | 0           | -1.254195               | -0.008403 | 0.263823  |
| 6             | 6             | 0           | -2.228316               | 1.750702  | -1.201061 |
| 7             | 6             | 0           | -2.646447               | -0.635874 | 0.284255  |
| 8             | 6             | 0           | -3.653803               | 1.403657  | -0.810066 |
| 9             | 1             | 0           | -2.122722               | 2.812325  | -1.413931 |
| 10            | 1             | 0           | -1.925988               | 1.191743  | -2.098730 |
| 11            | 6             | 0           | -2.826452               | -1.844036 | 0.979432  |
| 12            | 6             | 0           | -3.773467               | 0.011264  | -0.242753 |
| 13            | 1             | 0           | -4.011353               | 2.124434  | -0.060821 |
| 14            | 1             | 0           | -4.302156               | 1.521444  | -1.686957 |
| 15            | 6             | 0           | -4.075840               | -2.449260 | 1.072170  |
| 16            | 1             | 0           | -1.976111               | -2.310511 | 1.470431  |
| 17            | 6             | 0           | -5.029002               | -0.605742 | -0.146499 |
| 18            | 6             | 0           | -5.185228               | -1.833020 | 0.488453  |
| 19            | 1             | 0           | -4.184709               | -3.388702 | 1.606747  |
| 20            | 1             | 0           | -5.895130               | -0.098928 | -0.566514 |
| 21            | 1             | 0           | -6.166640               | -2.295328 | 0.549636  |
| 22            | 1             | 0           | -0.948854               | -0.035515 | 1.318490  |
| 23            | 6             | 0           | 1.078631                | 0.077118  | -0.595481 |
| 24            | 6             | 0           | 2.273288                | -0.861859 | -0.569628 |
| 25            | 7             | 0           | -0.248675               | -0.637149 | -0.625272 |
| 26            | 6             | 0           | 3.478688                | -0.440085 | -1.148047 |
| 27            | 6             | 0           | 2.190699                | -2.155361 | -0.026303 |
| 28            | 6             | 0           | -0.161320               | -2.092517 | -0.691605 |
| 29            | 6             | 0           | 4.613243                | -1.247372 | -1.110361 |
| 30            | 1             | 0           | 3.528579                | 0.539504  | -1.617620 |
| 31            | 6             | 0           | 3.333041                | -2.962977 | 0.002056  |
| 32            | 6             | 0           | 0.822810                | -2.678551 | 0.339476  |

|    |   |   |           |           |           |
|----|---|---|-----------|-----------|-----------|
| 33 | 1 | 0 | -1.161508 | -2.510571 | -0.587632 |
| 34 | 1 | 0 | 0.188578  | -2.371563 | -1.694279 |
| 35 | 6 | 0 | 4.545620  | -2.509240 | -0.514808 |
| 36 | 1 | 0 | 5.542895  | -0.897489 | -1.550803 |
| 37 | 1 | 0 | 3.260443  | -3.967607 | 0.413465  |
| 38 | 1 | 0 | 0.520410  | -2.382846 | 1.355264  |
| 39 | 1 | 0 | 0.815075  | -3.775399 | 0.312625  |
| 40 | 1 | 0 | 5.423486  | -3.149028 | -0.484049 |
| 41 | 1 | 0 | 1.171390  | 0.642289  | -1.533055 |
| 42 | 1 | 0 | 0.649021  | 0.712799  | 1.454798  |
| 43 | 6 | 0 | 2.319049  | 1.908285  | 1.025756  |
| 44 | 1 | 0 | 2.872346  | 2.290102  | 0.159103  |
| 45 | 6 | 0 | 1.986675  | 3.094921  | 1.956447  |
| 46 | 1 | 0 | 2.916373  | 3.519895  | 2.352375  |
| 47 | 1 | 0 | 1.437032  | 3.887471  | 1.451390  |
| 48 | 1 | 0 | 1.394178  | 2.752341  | 2.816104  |
| 49 | 6 | 0 | 3.224372  | 0.964800  | 1.848090  |
| 50 | 1 | 0 | 4.107777  | 1.517812  | 2.187623  |
| 51 | 1 | 0 | 2.694374  | 0.621990  | 2.747367  |
| 52 | 1 | 0 | 3.572858  | 0.086325  | 1.309228  |

1m

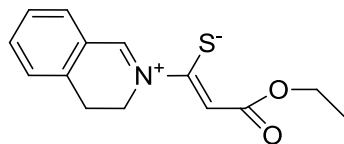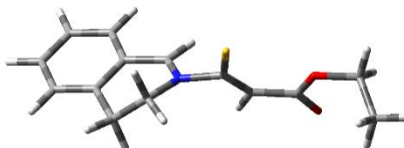

| Center Number | Atomic Number | Atomic Type | Coordinates (Angstroms) |           |           |
|---------------|---------------|-------------|-------------------------|-----------|-----------|
|               |               |             | X                       | Y         | Z         |
| 1             | 6             | 0           | 1.555325                | -0.586822 | 0.384493  |
| 2             | 6             | 0           | 0.936868                | 0.459040  | -0.254293 |
| 3             | 16            | 0           | 1.393754                | 1.743829  | -1.255250 |
| 4             | 7             | 0           | -0.532578               | 0.457798  | 0.003266  |
| 5             | 6             | 0           | -1.279056               | -0.535744 | -0.386477 |
| 6             | 6             | 0           | -1.177239               | 1.698469  | 0.513492  |
| 7             | 6             | 0           | -2.718101               | -0.546216 | -0.245126 |
| 8             | 6             | 0           | -2.409904               | 1.350276  | 1.346878  |
| 9             | 1             | 0           | -0.421429               | 2.235000  | 1.087099  |
| 10            | 1             | 0           | -1.438293               | 2.312857  | -0.351600 |
| 11            | 6             | 0           | -3.496134               | -1.509569 | -0.909872 |
| 12            | 6             | 0           | -3.326123               | 0.408480  | 0.600797  |
| 13            | 1             | 0           | -2.098308               | 0.880723  | 2.291701  |

|    |   |   |           |           |           |
|----|---|---|-----------|-----------|-----------|
| 14 | 1 | 0 | -2.929637 | 2.276854  | 1.612073  |
| 15 | 6 | 0 | -4.878250 | -1.509452 | -0.755318 |
| 16 | 1 | 0 | -3.012592 | -2.241481 | -1.551576 |
| 17 | 6 | 0 | -4.710261 | 0.393048  | 0.747265  |
| 18 | 6 | 0 | -5.482784 | -0.556408 | 0.070553  |
| 19 | 1 | 0 | -5.484208 | -2.245795 | -1.274100 |
| 20 | 1 | 0 | -5.190897 | 1.121343  | 1.395392  |
| 21 | 1 | 0 | -6.562248 | -0.554511 | 0.192466  |
| 22 | 1 | 0 | 0.963826  | -1.229842 | 1.028100  |
| 23 | 1 | 0 | -0.762573 | -1.372874 | -0.846241 |
| 24 | 6 | 0 | 2.964525  | -0.974055 | 0.371135  |
| 25 | 8 | 0 | 3.383993  | -1.930274 | 1.011860  |
| 26 | 8 | 0 | 3.750537  | -0.198252 | -0.409877 |
| 27 | 6 | 0 | 5.150016  | -0.537852 | -0.449809 |
| 28 | 1 | 0 | 5.255178  | -1.626091 | -0.452251 |
| 29 | 1 | 0 | 5.497130  | -0.136381 | -1.405562 |
| 30 | 6 | 0 | 5.908893  | 0.080691  | 0.716396  |
| 31 | 1 | 0 | 5.564590  | -0.344098 | 1.663439  |
| 32 | 1 | 0 | 6.982030  | -0.122217 | 0.616189  |
| 33 | 1 | 0 | 5.762527  | 1.165568  | 0.739454  |

**TS1-endo-m**

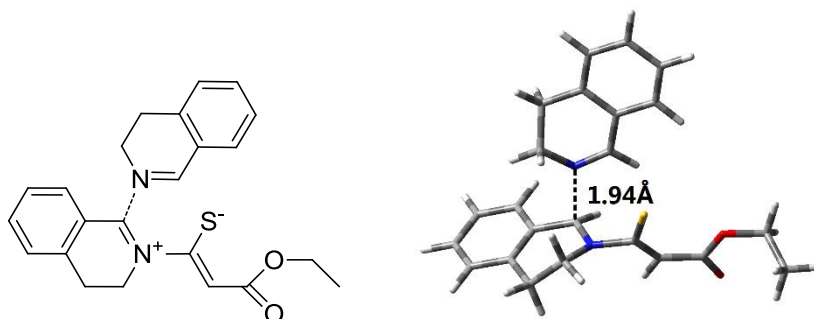

| Center Number | Atomic Number | Atomic Type | Coordinates (Angstroms) |           |           |
|---------------|---------------|-------------|-------------------------|-----------|-----------|
|               |               |             | X                       | Y         | Z         |
| 1             | 6             | 0           | 1.590529                | -2.193860 | -0.332537 |
| 2             | 6             | 0           | 0.995811                | -1.334004 | 0.554759  |
| 3             | 16            | 0           | 1.584564                | -0.081622 | 1.564621  |
| 4             | 7             | 0           | -0.473026               | -1.490693 | 0.585997  |
| 5             | 6             | 0           | -1.189740               | -1.028300 | -0.452879 |
| 6             | 6             | 0           | -1.151735               | -1.634137 | 1.885578  |
| 7             | 6             | 0           | -2.646479               | -1.310935 | -0.493942 |
| 8             | 6             | 0           | -2.393843               | -2.506885 | 1.705322  |
| 9             | 1             | 0           | -0.440100               | -2.086054 | 2.576575  |

|    |   |   |           |           |           |
|----|---|---|-----------|-----------|-----------|
| 10 | 1 | 0 | -1.414403 | -0.648957 | 2.289523  |
| 11 | 6 | 0 | -3.406325 | -0.906146 | -1.600451 |
| 12 | 6 | 0 | -3.249933 | -2.026445 | 0.554823  |
| 13 | 1 | 0 | -2.082056 | -3.543679 | 1.513152  |
| 14 | 1 | 0 | -2.973036 | -2.518949 | 2.635999  |
| 15 | 6 | 0 | -4.764651 | -1.200584 | -1.667724 |
| 16 | 1 | 0 | -2.924215 | -0.351573 | -2.401665 |
| 17 | 6 | 0 | -4.616576 | -2.314722 | 0.474910  |
| 18 | 6 | 0 | -5.371175 | -1.905595 | -0.623504 |
| 19 | 1 | 0 | -5.348225 | -0.885438 | -2.527871 |
| 20 | 1 | 0 | -5.090507 | -2.867521 | 1.282632  |
| 21 | 1 | 0 | -6.431869 | -2.137179 | -0.667171 |
| 22 | 1 | 0 | 0.968179  | -2.957692 | -0.789560 |
| 23 | 1 | 0 | -0.662146 | -1.064058 | -1.401172 |
| 24 | 7 | 0 | -1.121288 | 0.914134  | -0.438370 |
| 25 | 6 | 0 | 0.065493  | 1.404583  | -0.606205 |
| 26 | 6 | 0 | -2.090286 | 1.718355  | 0.314536  |
| 27 | 6 | 0 | 0.416560  | 2.794237  | -0.314457 |
| 28 | 1 | 0 | 0.806476  | 0.775491  | -1.093141 |
| 29 | 6 | 0 | -2.043090 | 3.190702  | -0.105909 |
| 30 | 1 | 0 | -3.086188 | 1.297227  | 0.157407  |
| 31 | 1 | 0 | -1.845295 | 1.625333  | 1.383657  |
| 32 | 6 | 0 | 1.752521  | 3.219429  | -0.337169 |
| 33 | 6 | 0 | -0.623217 | 3.711139  | -0.063430 |
| 34 | 1 | 0 | -2.443678 | 3.291694  | -1.126115 |
| 35 | 1 | 0 | -2.696122 | 3.779454  | 0.548170  |
| 36 | 6 | 0 | 2.057450  | 4.556612  | -0.102902 |
| 37 | 1 | 0 | 2.539074  | 2.489156  | -0.504913 |
| 38 | 6 | 0 | -0.303520 | 5.049416  | 0.162988  |
| 39 | 6 | 0 | 1.028514  | 5.470326  | 0.146265  |
| 40 | 1 | 0 | 3.091847  | 4.887257  | -0.108079 |
| 41 | 1 | 0 | -1.097609 | 5.766696  | 0.356958  |
| 42 | 1 | 0 | 1.264503  | 6.514604  | 0.332419  |
| 43 | 6 | 0 | 2.979125  | -2.293469 | -0.772406 |
| 44 | 8 | 0 | 3.363543  | -3.171194 | -1.536599 |
| 45 | 8 | 0 | 3.803177  | -1.327400 | -0.289975 |
| 46 | 6 | 0 | 5.184793  | -1.418054 | -0.681608 |
| 47 | 1 | 0 | 5.244571  | -1.722488 | -1.730253 |
| 48 | 1 | 0 | 5.563738  | -0.397196 | -0.577288 |
| 49 | 6 | 0 | 5.957735  | -2.382597 | 0.208135  |
| 50 | 1 | 0 | 5.580598  | -3.400931 | 0.080369  |
| 51 | 1 | 0 | 7.021722  | -2.371315 | -0.058373 |
| 52 | 1 | 0 | 5.860376  | -2.097677 | 1.260844  |

**C-endo-m**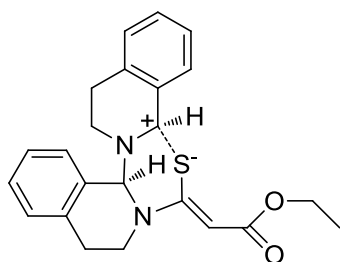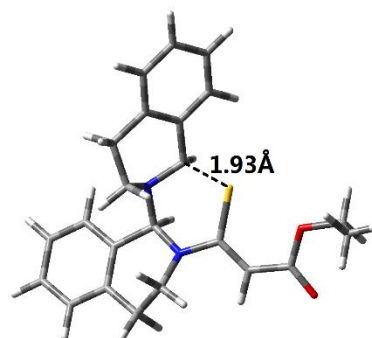

---

| Center Number | Atomic Number | Atomic Type | Coordinates (Angstroms) |           |           |
|---------------|---------------|-------------|-------------------------|-----------|-----------|
|               |               |             | X                       | Y         | Z         |
| 1             | 6             | 0           | 1.637539                | -2.475160 | -0.163175 |
| 2             | 6             | 0           | 0.849493                | -1.359136 | -0.194575 |
| 3             | 16            | 0           | 1.560647                | 0.282501  | -0.389805 |
| 4             | 7             | 0           | -0.523945               | -1.476348 | 0.022657  |
| 5             | 6             | 0           | -1.445906               | -0.507222 | -0.581273 |
| 6             | 6             | 0           | -1.037383               | -2.328364 | 1.103076  |
| 7             | 6             | 0           | -2.912668               | -0.890262 | -0.398173 |
| 8             | 6             | 0           | -2.262240               | -3.100258 | 0.623272  |
| 9             | 1             | 0           | -0.244291               | -3.002387 | 1.421241  |
| 10            | 1             | 0           | -1.312119               | -1.713980 | 1.974940  |
| 11            | 6             | 0           | -3.887774               | 0.014237  | -0.842827 |
| 12            | 6             | 0           | -3.307453               | -2.134309 | 0.117473  |
| 13            | 1             | 0           | -1.960975               | -3.797285 | -0.171203 |
| 14            | 1             | 0           | -2.669143               | -3.703931 | 1.443848  |
| 15            | 6             | 0           | -5.240618               | -0.306712 | -0.778664 |
| 16            | 1             | 0           | -3.568700               | 0.976337  | -1.231858 |
| 17            | 6             | 0           | -4.672578               | -2.444552 | 0.180363  |
| 18            | 6             | 0           | -5.636252               | -1.544843 | -0.265998 |
| 19            | 1             | 0           | -5.983599               | 0.405704  | -1.126660 |
| 20            | 1             | 0           | -4.975802               | -3.404699 | 0.592101  |
| 21            | 1             | 0           | -6.690128               | -1.803688 | -0.208804 |
| 22            | 1             | 0           | 1.138115                | -3.435015 | -0.090646 |
| 23            | 1             | 0           | -1.249966               | -0.526508 | -1.662613 |
| 24            | 7             | 0           | -1.196162               | 0.883356  | -0.189435 |
| 25            | 6             | 0           | 0.015056                | 1.358626  | -0.788807 |
| 26            | 6             | 0           | -1.294938               | 1.179835  | 1.244570  |
| 27            | 6             | 0           | 0.369066                | 2.775567  | -0.406362 |
| 28            | 1             | 0           | -0.086769               | 1.283243  | -1.875212 |
| 29            | 6             | 0           | -1.365284               | 2.694892  | 1.433985  |

---

|    |   |   |           |           |           |
|----|---|---|-----------|-----------|-----------|
| 30 | 1 | 0 | -2.204498 | 0.708586  | 1.626473  |
| 31 | 1 | 0 | -0.437916 | 0.767721  | 1.801073  |
| 32 | 6 | 0 | 1.350624  | 3.460170  | -1.135857 |
| 33 | 6 | 0 | -0.272008 | 3.410429  | 0.669223  |
| 34 | 1 | 0 | -2.345243 | 3.050457  | 1.086078  |
| 35 | 1 | 0 | -1.302106 | 2.937985  | 2.501870  |
| 36 | 6 | 0 | 1.705505  | 4.764231  | -0.801458 |
| 37 | 1 | 0 | 1.839454  | 2.962208  | -1.970140 |
| 38 | 6 | 0 | 0.092151  | 4.723118  | 0.993117  |
| 39 | 6 | 0 | 1.073182  | 5.398425  | 0.270547  |
| 40 | 1 | 0 | 2.468331  | 5.283491  | -1.374778 |
| 41 | 1 | 0 | -0.402954 | 5.218070  | 1.826005  |
| 42 | 1 | 0 | 1.343148  | 6.415635  | 0.541276  |
| 43 | 6 | 0 | 3.086070  | -2.624583 | -0.237968 |
| 44 | 8 | 0 | 3.640664  | -3.711597 | -0.302507 |
| 45 | 8 | 0 | 3.768135  | -1.446860 | -0.230064 |
| 46 | 6 | 0 | 5.204413  | -1.530067 | -0.339767 |
| 47 | 1 | 0 | 5.460100  | -2.329769 | -1.039342 |
| 48 | 1 | 0 | 5.499532  | -0.566731 | -0.764089 |
| 49 | 6 | 0 | 5.854835  | -1.761760 | 1.016793  |
| 50 | 1 | 0 | 5.559742  | -2.734970 | 1.418060  |
| 51 | 1 | 0 | 6.946659  | -1.745271 | 0.916092  |
| 52 | 1 | 0 | 5.562146  | -0.980420 | 1.726114  |

**TS2-Si-m**

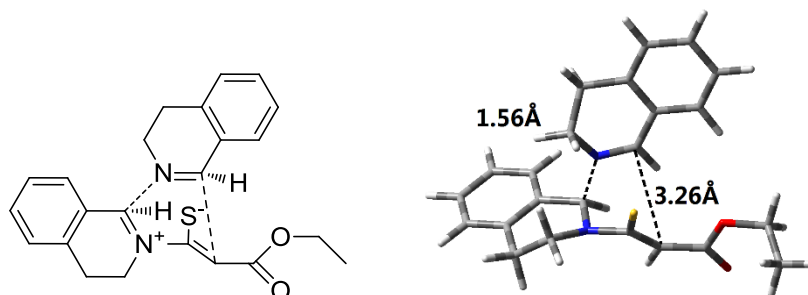

| Center Number | Atomic Number | Atomic Type | Coordinates (Angstroms) |           |           |
|---------------|---------------|-------------|-------------------------|-----------|-----------|
|               |               |             | X                       | Y         | Z         |
| 1             | 6             | 0           | 0.970442                | -2.137455 | -0.506150 |
| 2             | 6             | 0           | 0.417749                | -1.557995 | 0.625326  |
| 3             | 16            | 0           | 1.139729                | -0.922600 | 2.039894  |
| 4             | 7             | 0           | -1.037419               | -1.436357 | 0.521177  |
| 5             | 6             | 0           | -1.491579               | -0.550467 | -0.492575 |
| 6             | 6             | 0           | -1.859938               | -1.564069 | 1.728936  |



|    |   |   |           |           |           |
|----|---|---|-----------|-----------|-----------|
| 7  | 6 | 0 | -2.994985 | -0.400896 | -0.592583 |
| 8  | 6 | 0 | -3.261257 | -2.018032 | 1.321849  |
| 9  | 1 | 0 | -1.375931 | -2.303398 | 2.367300  |
| 10 | 1 | 0 | -1.910266 | -0.636220 | 2.314958  |
| 11 | 6 | 0 | -3.531003 | 0.424478  | -1.591124 |
| 12 | 6 | 0 | -3.848347 | -1.109642 | 0.266274  |
| 13 | 1 | 0 | -3.205379 | -3.043503 | 0.930864  |
| 14 | 1 | 0 | -3.915550 | -2.047091 | 2.201684  |
| 15 | 6 | 0 | -4.908419 | 0.557862  | -1.738514 |
| 16 | 1 | 0 | -2.860517 | 0.964216  | -2.256317 |
| 17 | 6 | 0 | -5.233397 | -0.965234 | 0.107847  |
| 18 | 6 | 0 | -5.763415 | -0.141661 | -0.882052 |
| 19 | 1 | 0 | -5.313361 | 1.198504  | -2.516722 |
| 20 | 1 | 0 | -5.899027 | -1.508786 | 0.774357  |
| 21 | 1 | 0 | -6.840527 | -0.043721 | -0.986835 |
| 22 | 1 | 0 | 0.288686  | -2.637572 | -1.189840 |
| 23 | 1 | 0 | -1.082560 | -0.850577 | -1.460812 |
| 24 | 7 | 0 | -0.834377 | 0.851550  | -0.298514 |
| 25 | 6 | 0 | 0.346105  | 1.045411  | -0.819825 |
| 26 | 6 | 0 | -1.232510 | 1.679348  | 0.861997  |
| 27 | 6 | 0 | 1.201719  | 2.148310  | -0.454639 |
| 28 | 1 | 0 | 0.683392  | 0.322048  | -1.555561 |
| 29 | 6 | 0 | -0.805049 | 3.133004  | 0.660459  |
| 30 | 1 | 0 | -2.313800 | 1.595606  | 0.975811  |
| 31 | 1 | 0 | -0.731486 | 1.234391  | 1.735333  |
| 32 | 6 | 0 | 2.547928  | 2.157593  | -0.854570 |
| 33 | 6 | 0 | 0.659339  | 3.215831  | 0.292926  |
| 34 | 1 | 0 | -1.414091 | 3.596546  | -0.130357 |
| 35 | 1 | 0 | -1.007140 | 3.689532  | 1.581467  |
| 36 | 6 | 0 | 3.357930  | 3.234842  | -0.511824 |
| 37 | 1 | 0 | 2.951966  | 1.302602  | -1.388618 |
| 38 | 6 | 0 | 1.479655  | 4.292109  | 0.614718  |
| 39 | 6 | 0 | 2.820927  | 4.300742  | 0.215969  |
| 40 | 1 | 0 | 4.403808  | 3.243594  | -0.802228 |
| 41 | 1 | 0 | 1.078633  | 5.124323  | 1.187546  |
| 42 | 1 | 0 | 3.452632  | 5.142971  | 0.484392  |
| 43 | 6 | 0 | 2.351244  | -2.286287 | -0.929814 |
| 44 | 8 | 0 | 2.690181  | -3.007054 | -1.863885 |
| 45 | 8 | 0 | 3.250979  | -1.508010 | -0.253914 |
| 46 | 6 | 0 | 4.635239  | -1.716804 | -0.579728 |
| 47 | 1 | 0 | 4.741425  | -1.836307 | -1.662088 |
| 48 | 1 | 0 | 5.131416  | -0.793363 | -0.264968 |
| 49 | 6 | 0 | 5.209793  | -2.920271 | 0.156144  |
| 50 | 1 | 0 | 4.722976  | -3.838522 | -0.183582 |

|    |   |   |          |           |           |
|----|---|---|----------|-----------|-----------|
| 51 | 1 | 0 | 6.285833 | -3.005866 | -0.039895 |
| 52 | 1 | 0 | 5.057444 | -2.817948 | 1.235277  |

**7m**

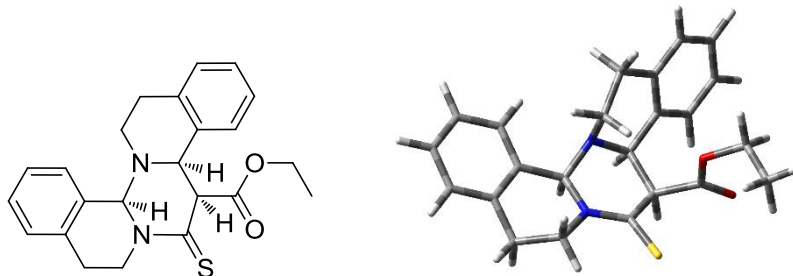

| Center Number | Atomic Number | Atomic Type | Coordinates (Angstroms) |           |           |
|---------------|---------------|-------------|-------------------------|-----------|-----------|
|               |               |             | X                       | Y         | Z         |
| 1             | 6             | 0           | -0.912416               | 0.926357  | -1.096855 |
| 2             | 6             | 0           | 0.181265                | 1.849811  | -0.524913 |
| 3             | 16            | 0           | -0.226850               | 3.440134  | -0.179140 |
| 4             | 7             | 0           | 1.427685                | 1.347069  | -0.387164 |
| 5             | 6             | 0           | 1.693978                | -0.102191 | -0.704192 |
| 6             | 6             | 0           | 2.516078                | 2.202342  | 0.112055  |
| 7             | 6             | 0           | 3.047947                | -0.588026 | -0.200851 |
| 8             | 6             | 0           | 3.873095                | 1.752236  | -0.422773 |
| 9             | 1             | 0           | 2.292979                | 3.225416  | -0.193048 |
| 10            | 1             | 0           | 2.510957                | 2.183762  | 1.210230  |
| 11            | 6             | 0           | 3.251844                | -1.950691 | 0.048382  |
| 12            | 6             | 0           | 4.125795                | 0.302991  | -0.104831 |
| 13            | 1             | 0           | 3.904684                | 1.917314  | -1.510028 |
| 14            | 1             | 0           | 4.651195                | 2.389389  | 0.011908  |
| 15            | 6             | 0           | 4.510222                | -2.419517 | 0.422831  |
| 16            | 1             | 0           | 2.417132                | -2.635344 | -0.059325 |
| 17            | 6             | 0           | 5.383090                | -0.175434 | 0.277456  |
| 18            | 6             | 0           | 5.579280                | -1.529652 | 0.542588  |
| 19            | 1             | 0           | 4.654556                | -3.478256 | 0.619804  |
| 20            | 1             | 0           | 6.212468                | 0.522800  | 0.364397  |
| 21            | 1             | 0           | 6.561026                | -1.888847 | 0.839052  |
| 22            | 1             | 0           | -1.016020               | 1.226951  | -2.143970 |
| 23            | 1             | 0           | 1.719710                | -0.172312 | -1.802774 |
| 24            | 7             | 0           | 0.599264                | -0.938347 | -0.284040 |
| 25            | 6             | 0           | -0.580001               | -0.636450 | -1.090050 |
| 26            | 6             | 0           | 0.312213                | -0.962348 | 1.160503  |
| 27            | 6             | 0           | -1.747749               | -1.536009 | -0.716658 |
| 28            | 1             | 0           | -0.305503               | -0.879750 | -2.123981 |

|    |   |   |           |           |           |
|----|---|---|-----------|-----------|-----------|
| 29 | 6 | 0 | -0.583881 | -2.166479 | 1.447713  |
| 30 | 1 | 0 | 1.258432  | -1.057307 | 1.698720  |
| 31 | 1 | 0 | -0.176088 | -0.037513 | 1.498040  |
| 32 | 6 | 0 | -2.825080 | -1.664141 | -1.603802 |
| 33 | 6 | 0 | -1.754083 | -2.253953 | 0.489573  |
| 34 | 1 | 0 | 0.015429  | -3.084480 | 1.367419  |
| 35 | 1 | 0 | -0.945769 | -2.118966 | 2.482488  |
| 36 | 6 | 0 | -3.905422 | -2.489571 | -1.303354 |
| 37 | 1 | 0 | -2.821768 | -1.102127 | -2.534387 |
| 38 | 6 | 0 | -2.846465 | -3.081311 | 0.780892  |
| 39 | 6 | 0 | -3.916232 | -3.202731 | -0.102683 |
| 40 | 1 | 0 | -4.732616 | -2.575697 | -2.002265 |
| 41 | 1 | 0 | -2.852104 | -3.637114 | 1.716502  |
| 42 | 1 | 0 | -4.754281 | -3.849432 | 0.143446  |
| 43 | 6 | 0 | -2.282218 | 1.251378  | -0.495356 |
| 44 | 8 | 0 | -3.246002 | 1.556104  | -1.162352 |
| 45 | 8 | 0 | -2.305744 | 1.056275  | 0.837163  |
| 46 | 6 | 0 | -3.573152 | 1.279947  | 1.503253  |
| 47 | 1 | 0 | -4.372134 | 0.900399  | 0.862024  |
| 48 | 1 | 0 | -3.510655 | 0.665708  | 2.405085  |
| 49 | 6 | 0 | -3.775262 | 2.749328  | 1.838232  |
| 50 | 1 | 0 | -3.848647 | 3.346249  | 0.925667  |
| 51 | 1 | 0 | -4.702502 | 2.871428  | 2.410762  |
| 52 | 1 | 0 | -2.942626 | 3.130191  | 2.437456  |

#### 4m

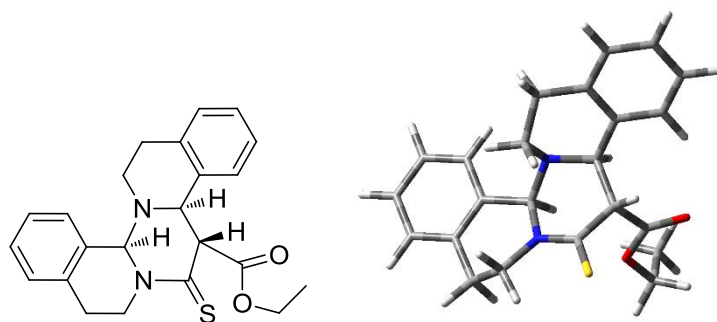

| Center Number | Atomic Number | Atomic Type | Coordinates (Angstroms) |           |           |
|---------------|---------------|-------------|-------------------------|-----------|-----------|
|               |               |             | X                       | Y         | Z         |
| 1             | 6             | 0           | 1.204608                | -1.035334 | 0.525825  |
| 2             | 6             | 0           | 0.019496                | -1.120396 | 1.492099  |
| 3             | 16            | 0           | 0.258754                | -1.837067 | 2.988233  |
| 4             | 7             | 0           | -1.152730               | -0.613076 | 1.058589  |
| 5             | 6             | 0           | -1.158263               | 0.164274  | -0.224911 |

|    |   |   |           |           |           |
|----|---|---|-----------|-----------|-----------|
| 6  | 6 | 0 | -2.358627 | -0.680750 | 1.891036  |
| 7  | 6 | 0 | -2.473753 | 0.885861  | -0.485365 |
| 8  | 6 | 0 | -3.612938 | -0.750154 | 1.023309  |
| 9  | 1 | 0 | -2.263682 | -1.562137 | 2.526458  |
| 10 | 1 | 0 | -2.397606 | 0.195599  | 2.553071  |
| 11 | 6 | 0 | -2.499317 | 1.963906  | -1.379007 |
| 12 | 6 | 0 | -3.672069 | 0.417487  | 0.072577  |
| 13 | 1 | 0 | -3.611955 | -1.699951 | 0.469038  |
| 14 | 1 | 0 | -4.495261 | -0.765984 | 1.672865  |
| 15 | 6 | 0 | -3.704000 | 2.584668  | -1.704071 |
| 16 | 1 | 0 | -1.564895 | 2.307666  | -1.810605 |
| 17 | 6 | 0 | -4.875242 | 1.051761  | -0.255766 |
| 18 | 6 | 0 | -4.897195 | 2.128420  | -1.140141 |
| 19 | 1 | 0 | -3.710189 | 3.423265  | -2.394945 |
| 20 | 1 | 0 | -5.800810 | 0.694910  | 0.190414  |
| 21 | 1 | 0 | -5.839379 | 2.611094  | -1.385338 |
| 22 | 1 | 0 | 2.102665  | -1.011160 | 1.140505  |
| 23 | 1 | 0 | -1.026179 | -0.573698 | -1.028193 |
| 24 | 7 | 0 | -0.005745 | 1.040416  | -0.290171 |
| 25 | 6 | 0 | 1.204279  | 0.232217  | -0.451555 |
| 26 | 6 | 0 | 0.085161  | 2.029831  | 0.794910  |
| 27 | 6 | 0 | 2.481788  | 1.050503  | -0.320298 |
| 28 | 1 | 0 | 1.170526  | -0.154258 | -1.478576 |
| 29 | 6 | 0 | 1.144383  | 3.062439  | 0.424049  |
| 30 | 1 | 0 | -0.893405 | 2.505353  | 0.902954  |
| 31 | 1 | 0 | 0.337141  | 1.565678  | 1.762990  |
| 32 | 6 | 0 | 3.708384  | 0.442062  | -0.628281 |
| 33 | 6 | 0 | 2.457380  | 2.393972  | 0.083271  |
| 34 | 1 | 0 | 0.786283  | 3.648124  | -0.434281 |
| 35 | 1 | 0 | 1.282797  | 3.766841  | 1.253475  |
| 36 | 6 | 0 | 4.898845  | 1.158144  | -0.542731 |
| 37 | 1 | 0 | 3.725109  | -0.603807 | -0.924076 |
| 38 | 6 | 0 | 3.664091  | 3.102032  | 0.168288  |
| 39 | 6 | 0 | 4.877786  | 2.497189  | -0.144190 |
| 40 | 1 | 0 | 5.840114  | 0.671855  | -0.783804 |
| 41 | 1 | 0 | 3.643062  | 4.141266  | 0.490101  |
| 42 | 1 | 0 | 5.802824  | 3.062782  | -0.070275 |
| 43 | 6 | 0 | 1.341518  | -2.299197 | -0.321455 |
| 44 | 8 | 0 | 2.405194  | -2.716309 | -0.728885 |
| 45 | 8 | 0 | 0.150467  | -2.855534 | -0.621693 |
| 46 | 6 | 0 | 0.178065  | -4.058218 | -1.434947 |
| 47 | 1 | 0 | 1.038151  | -4.659844 | -1.133455 |
| 48 | 1 | 0 | -0.743071 | -4.580302 | -1.166175 |
| 49 | 6 | 0 | 0.224581  | -3.728004 | -2.918572 |

|    |   |   |           |           |           |
|----|---|---|-----------|-----------|-----------|
| 50 | 1 | 0 | 1.160859  | -3.223887 | -3.173685 |
| 51 | 1 | 0 | 0.163246  | -4.652363 | -3.504317 |
| 52 | 1 | 0 | -0.616119 | -3.086881 | -3.204640 |

**TS1-*exo-m***

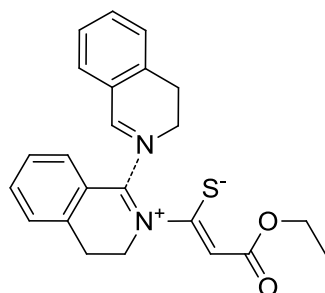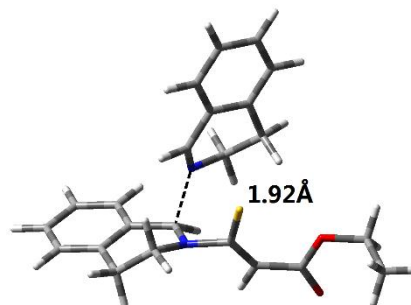

| Center Number | Atomic Number | Atomic Type | Coordinates (Angstroms) |           |           |
|---------------|---------------|-------------|-------------------------|-----------|-----------|
|               |               |             | X                       | Y         | Z         |
| 1             | 6             | 0           | 1.028793                | -2.364937 | -0.212518 |
| 2             | 6             | 0           | 0.531775                | -1.444209 | 0.674213  |
| 3             | 16            | 0           | 1.263426                | -0.330700 | 1.749041  |
| 4             | 7             | 0           | -0.942722               | -1.359415 | 0.648455  |
| 5             | 6             | 0           | -1.514118               | -0.843453 | -0.459974 |
| 6             | 6             | 0           | -1.678199               | -1.324810 | 1.926960  |
| 7             | 6             | 0           | -2.993722               | -0.680309 | -0.485866 |
| 8             | 6             | 0           | -3.079351               | -1.891074 | 1.711763  |
| 9             | 1             | 0           | -1.106691               | -1.922524 | 2.637384  |
| 10            | 1             | 0           | -1.727963               | -0.308440 | 2.331765  |
| 11            | 6             | 0           | -3.614986               | -0.073096 | -1.586284 |
| 12            | 6             | 0           | -3.772640               | -1.193580 | 0.565336  |
| 13            | 1             | 0           | -3.006491               | -2.967040 | 1.497211  |
| 14            | 1             | 0           | -3.662780               | -1.789646 | 2.634035  |
| 15            | 6             | 0           | -5.000022               | 0.037193  | -1.643015 |
| 16            | 1             | 0           | -3.004152               | 0.323649  | -2.392698 |
| 17            | 6             | 0           | -5.165294               | -1.074698 | 0.497665  |
| 18            | 6             | 0           | -5.777803               | -0.463811 | -0.594289 |
| 19            | 1             | 0           | -5.473167               | 0.512143  | -2.497587 |
| 20            | 1             | 0           | -5.771046               | -1.467370 | 1.310891  |
| 21            | 1             | 0           | -6.860350               | -0.377285 | -0.629530 |
| 22            | 1             | 0           | 0.324397                | -3.044232 | -0.684635 |
| 23            | 1             | 0           | -1.055235               | -1.175519 | -1.386471 |
| 24            | 7             | 0           | -0.795892               | 0.909635  | -0.755065 |
| 25            | 6             | 0           | -0.579576               | 1.660117  | 0.277947  |
| 26            | 6             | 0           | 0.035117                | 1.112750  | -1.953691 |

|    |   |   |           |           |           |
|----|---|---|-----------|-----------|-----------|
| 27 | 6 | 0 | 0.367276  | 2.772264  | 0.284575  |
| 28 | 1 | 0 | -1.219645 | 1.516177  | 1.143539  |
| 29 | 6 | 0 | 1.450937  | 1.596579  | -1.620206 |
| 30 | 1 | 0 | 0.074767  | 0.168632  | -2.505567 |
| 31 | 1 | 0 | -0.481704 | 1.843606  | -2.593163 |
| 32 | 6 | 0 | 0.271584  | 3.803566  | 1.227735  |
| 33 | 6 | 0 | 1.383693  | 2.785558  | -0.692339 |
| 34 | 1 | 0 | 2.003066  | 0.785891  | -1.123514 |
| 35 | 1 | 0 | 1.982597  | 1.842559  | -2.546138 |
| 36 | 6 | 0 | 1.177302  | 4.860956  | 1.194734  |
| 37 | 1 | 0 | -0.510667 | 3.772445  | 1.982182  |
| 38 | 6 | 0 | 2.287812  | 3.844164  | -0.709011 |
| 39 | 6 | 0 | 2.183669  | 4.879446  | 0.225641  |
| 40 | 1 | 0 | 1.104484  | 5.663584  | 1.922694  |
| 41 | 1 | 0 | 3.081380  | 3.860663  | -1.452056 |
| 42 | 1 | 0 | 2.894066  | 5.701225  | 0.198494  |
| 43 | 6 | 0 | 2.401119  | -2.630766 | -0.626417 |
| 44 | 8 | 0 | 2.705286  | -3.579929 | -1.339235 |
| 45 | 8 | 0 | 3.312455  | -1.715364 | -0.196296 |
| 46 | 6 | 0 | 4.684503  | -1.970134 | -0.548623 |
| 47 | 1 | 0 | 4.729882  | -2.353845 | -1.571644 |
| 48 | 1 | 0 | 5.162276  | -0.987092 | -0.506915 |
| 49 | 6 | 0 | 5.340816  | -2.939402 | 0.425460  |
| 50 | 1 | 0 | 4.868392  | -3.923266 | 0.358432  |
| 51 | 1 | 0 | 6.405880  | -3.050048 | 0.187521  |
| 52 | 1 | 0 | 5.250129  | -2.572149 | 1.452841  |

**C-*exo*-m**

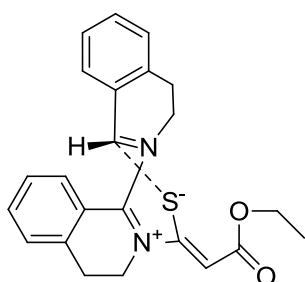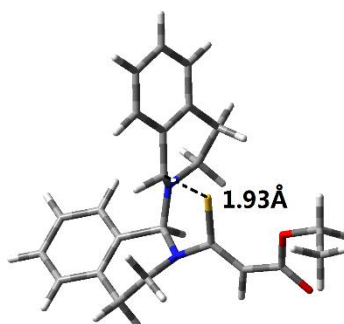

| Center Number | Atomic Number | Atomic Type | Coordinates (Angstroms) |           |          |
|---------------|---------------|-------------|-------------------------|-----------|----------|
|               |               |             | X                       | Y         | Z        |
| 1             | 6             | 0           | -2.127317               | -1.998585 | 0.529460 |
| 2             | 6             | 0           | -1.132307               | -1.197684 | 0.076449 |

|    |    |   |           |           |           |
|----|----|---|-----------|-----------|-----------|
| 3  | 16 | 0 | -1.361701 | 0.437575  | -0.613367 |
| 4  | 7  | 0 | 0.188525  | -1.729624 | 0.061297  |
| 5  | 6  | 0 | 1.226395  | -0.987579 | 0.802774  |
| 6  | 6  | 0 | 0.552697  | -2.374566 | -1.209224 |
| 7  | 6  | 0 | 2.644017  | -1.382919 | 0.367648  |
| 8  | 6  | 0 | 1.740307  | -3.302186 | -0.979002 |
| 9  | 1  | 0 | -0.321530 | -2.940016 | -1.541815 |
| 10 | 1  | 0 | 0.795246  | -1.647589 | -2.004115 |
| 11 | 6  | 0 | 3.720289  | -0.618605 | 0.837986  |
| 12 | 6  | 0 | 2.899813  | -2.512556 | -0.424452 |
| 13 | 1  | 0 | 1.437477  | -4.095602 | -0.281608 |
| 14 | 1  | 0 | 2.024377  | -3.788265 | -1.920091 |
| 15 | 6  | 0 | 5.033927  | -0.972249 | 0.542373  |
| 16 | 1  | 0 | 3.519104  | 0.269914  | 1.428307  |
| 17 | 6  | 0 | 4.224775  | -2.855615 | -0.724516 |
| 18 | 6  | 0 | 5.289350  | -2.100243 | -0.241263 |
| 19 | 1  | 0 | 5.855147  | -0.366555 | 0.915981  |
| 20 | 1  | 0 | 4.415040  | -3.722600 | -1.353608 |
| 21 | 1  | 0 | 6.310915  | -2.380811 | -0.483652 |
| 22 | 1  | 0 | -1.835584 | -2.967006 | 0.921654  |
| 23 | 1  | 0 | 1.122356  | -1.275748 | 1.859050  |
| 24 | 7  | 0 | 1.044916  | 0.472455  | 0.781802  |
| 25 | 6  | 0 | 0.480887  | 0.974595  | -0.427052 |
| 26 | 6  | 0 | 0.716513  | 1.129747  | 2.058147  |
| 27 | 6  | 0 | 0.529937  | 2.475583  | -0.506694 |
| 28 | 1  | 0 | 1.008662  | 0.530758  | -1.274385 |
| 29 | 6  | 0 | -0.114359 | 2.417494  | 1.894131  |
| 30 | 1  | 0 | 0.167632  | 0.437435  | 2.712244  |
| 31 | 1  | 0 | 1.655881  | 1.373815  | 2.574997  |
| 32 | 6  | 0 | 0.838684  | 3.141802  | -1.694179 |
| 33 | 6  | 0 | 0.272673  | 3.202252  | 0.665935  |
| 34 | 1  | 0 | -1.174483 | 2.146341  | 1.814797  |
| 35 | 1  | 0 | -0.006626 | 3.026282  | 2.798668  |
| 36 | 6  | 0 | 0.897685  | 4.536060  | -1.720822 |
| 37 | 1  | 0 | 1.039286  | 2.569191  | -2.596798 |
| 38 | 6  | 0 | 0.348037  | 4.595919  | 0.634244  |
| 39 | 6  | 0 | 0.655771  | 5.262501  | -0.553885 |
| 40 | 1  | 0 | 1.139997  | 5.051287  | -2.646127 |
| 41 | 1  | 0 | 0.159113  | 5.163251  | 1.542873  |
| 42 | 1  | 0 | 0.709338  | 6.347846  | -0.566697 |
| 43 | 6  | 0 | -3.575566 | -1.761992 | 0.582374  |
| 44 | 8  | 0 | -4.355135 | -2.531598 | 1.118501  |
| 45 | 8  | 0 | -3.959151 | -0.609261 | -0.021384 |
| 46 | 6  | 0 | -5.368523 | -0.292461 | 0.018057  |

|    |   |   |           |           |           |
|----|---|---|-----------|-----------|-----------|
| 47 | 1 | 0 | -5.767849 | -0.583948 | 0.992679  |
| 48 | 1 | 0 | -5.401912 | 0.795575  | -0.079306 |
| 49 | 6 | 0 | -6.124571 | -0.976082 | -1.111843 |
| 50 | 1 | 0 | -6.095444 | -2.062166 | -0.989268 |
| 51 | 1 | 0 | -7.173138 | -0.655767 | -1.105744 |
| 52 | 1 | 0 | -5.690264 | -0.715554 | -2.082661 |

**TS2-Re-m**

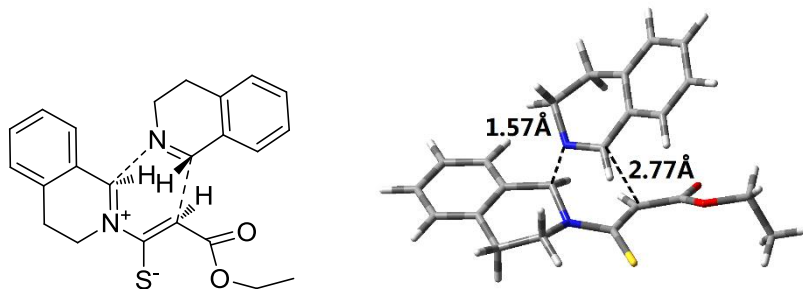

| Center Number | Atomic Number | Atomic Type | Coordinates (Angstroms) |           |           |
|---------------|---------------|-------------|-------------------------|-----------|-----------|
|               |               |             | X                       | Y         | Z         |
| 1             | 6             | 0           | -0.812661               | -1.319186 | 1.009889  |
| 2             | 6             | 0           | -0.119089               | -1.875860 | -0.082813 |
| 3             | 16            | 0           | -0.776505               | -2.942483 | -1.226583 |
| 4             | 7             | 0           | 1.228026                | -1.395353 | -0.265886 |
| 5             | 6             | 0           | 1.636496                | -0.184383 | 0.369602  |
| 6             | 6             | 0           | 1.914577                | -1.630361 | -1.548078 |
| 7             | 6             | 0           | 3.145289                | 0.010297  | 0.405230  |
| 8             | 6             | 0           | 3.417295                | -1.770501 | -1.356412 |
| 9             | 1             | 0           | 1.483094                | -2.528862 | -1.985281 |
| 10            | 1             | 0           | 1.702631                | -0.795840 | -2.236200 |
| 11            | 6             | 0           | 3.716429                | 0.824580  | 1.396997  |
| 12            | 6             | 0           | 3.991599                | -0.704343 | -0.456790 |
| 13            | 1             | 0           | 3.633870                | -2.750515 | -0.908013 |
| 14            | 1             | 0           | 3.909944                | -1.760358 | -2.336696 |
| 15            | 6             | 0           | 5.093465                | 1.018989  | 1.468182  |
| 16            | 1             | 0           | 3.081833                | 1.285910  | 2.149883  |
| 17            | 6             | 0           | 5.375052                | -0.498827 | -0.381793 |
| 18            | 6             | 0           | 5.927042                | 0.369917  | 0.555704  |
| 19            | 1             | 0           | 5.512188                | 1.657360  | 2.240790  |
| 20            | 1             | 0           | 6.024846                | -1.049547 | -1.058232 |
| 21            | 1             | 0           | 7.003089                | 0.515057  | 0.596661  |
| 22            | 1             | 0           | 1.281407                | -0.166116 | 1.399850  |
| 23            | 6             | 0           | -0.351786               | 0.772774  | -0.741429 |



|    |   |   |           |           |           |
|----|---|---|-----------|-----------|-----------|
| 24 | 6 | 0 | -1.403050 | 1.763236  | -0.801093 |
| 25 | 7 | 0 | 0.852763  | 1.032516  | -0.241930 |
| 26 | 6 | 0 | -2.534152 | 1.537229  | -1.606649 |
| 27 | 6 | 0 | -1.321315 | 2.919044  | 0.007035  |
| 28 | 6 | 0 | 1.107798  | 2.412043  | 0.226353  |
| 29 | 6 | 0 | -3.563641 | 2.471882  | -1.630379 |
| 30 | 1 | 0 | -2.595720 | 0.625789  | -2.194184 |
| 31 | 6 | 0 | -2.361270 | 3.842088  | -0.024013 |
| 32 | 6 | 0 | -0.113947 | 3.036538  | 0.904959  |
| 33 | 1 | 0 | 1.968961  | 2.407112  | 0.888234  |
| 34 | 1 | 0 | 1.385540  | 3.001783  | -0.656943 |
| 35 | 6 | 0 | -3.474178 | 3.624633  | -0.843795 |
| 36 | 1 | 0 | -4.436530 | 2.303211  | -2.253654 |
| 37 | 1 | 0 | -2.309174 | 4.733852  | 0.595739  |
| 38 | 1 | 0 | -0.316320 | 2.524270  | 1.857404  |
| 39 | 1 | 0 | 0.103127  | 4.083225  | 1.145587  |
| 40 | 1 | 0 | -4.277173 | 4.356268  | -0.862473 |
| 41 | 1 | 0 | -0.499133 | -0.146593 | -1.291523 |
| 42 | 1 | 0 | -0.254348 | -0.972153 | 1.872875  |
| 43 | 6 | 0 | -2.233313 | -1.321019 | 1.333662  |
| 44 | 8 | 0 | -2.642163 | -1.054091 | 2.459894  |
| 45 | 8 | 0 | -3.072857 | -1.532357 | 0.285873  |
| 46 | 6 | 0 | -4.477751 | -1.561280 | 0.594769  |
| 47 | 1 | 0 | -4.706910 | -0.772147 | 1.316354  |
| 48 | 1 | 0 | -4.968292 | -1.335782 | -0.356785 |
| 49 | 6 | 0 | -4.907781 | -2.923781 | 1.121868  |
| 50 | 1 | 0 | -4.430868 | -3.125880 | 2.084808  |
| 51 | 1 | 0 | -5.995498 | -2.947600 | 1.262259  |
| 52 | 1 | 0 | -4.628495 | -3.713544 | 0.417402  |

8m

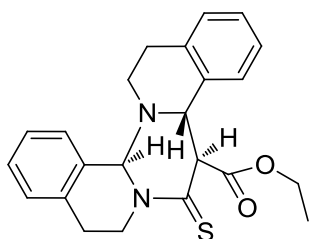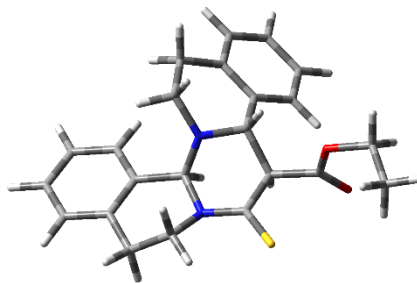

| Center Number | Atomic Number | Atomic Type | Coordinates (Angstroms) |   |   |
|---------------|---------------|-------------|-------------------------|---|---|
|               |               |             | X                       | Y | Z |

|    |    |   |           |           |           |
|----|----|---|-----------|-----------|-----------|
| 1  | 6  | 0 | -1.340775 | -0.438251 | 0.538711  |
| 2  | 6  | 0 | -0.684278 | -1.816074 | 0.367331  |
| 3  | 16 | 0 | -1.584827 | -3.212524 | 0.226142  |
| 4  | 7  | 0 | 0.675983  | -1.764717 | 0.349776  |
| 5  | 6  | 0 | 1.265955  | -0.403870 | 0.232640  |
| 6  | 6  | 0 | 1.431506  | -2.867529 | -0.259375 |
| 7  | 6  | 0 | 2.786293  | -0.404807 | 0.202913  |
| 8  | 6  | 0 | 2.850332  | -2.925574 | 0.281220  |
| 9  | 1  | 0 | 0.890176  | -3.790163 | -0.056461 |
| 10 | 1  | 0 | 1.437769  | -2.713860 | -1.349179 |
| 11 | 6  | 0 | 3.449822  | 0.829085  | 0.293190  |
| 12 | 6  | 0 | 3.541333  | -1.586490 | 0.210825  |
| 13 | 1  | 0 | 2.824999  | -3.265202 | 1.326485  |
| 14 | 1  | 0 | 3.415654  | -3.680545 | -0.278160 |
| 15 | 6  | 0 | 4.838861  | 0.900242  | 0.315995  |
| 16 | 1  | 0 | 2.866242  | 1.741059  | 0.371085  |
| 17 | 6  | 0 | 4.940988  | -1.504517 | 0.228372  |
| 18 | 6  | 0 | 5.591783  | -0.275933 | 0.267723  |
| 19 | 1  | 0 | 5.331106  | 1.866478  | 0.381748  |
| 20 | 1  | 0 | 5.520287  | -2.425164 | 0.223175  |
| 21 | 1  | 0 | 6.677465  | -0.233920 | 0.279480  |
| 22 | 1  | 0 | 1.000160  | 0.115739  | 1.166518  |
| 23 | 6  | 0 | -0.792907 | 0.595931  | -0.506906 |
| 24 | 6  | 0 | -0.849421 | 2.052308  | -0.022475 |
| 25 | 7  | 0 | 0.565225  | 0.210932  | -0.892175 |
| 26 | 6  | 0 | -1.786293 | 2.497346  | 0.923063  |
| 27 | 6  | 0 | 0.059128  | 2.980506  | -0.569937 |
| 28 | 6  | 0 | 1.136163  | 1.068511  | -1.914918 |
| 29 | 6  | 0 | -1.831453 | 3.831367  | 1.324140  |
| 30 | 1  | 0 | -2.490263 | 1.800828  | 1.366792  |
| 31 | 6  | 0 | 0.006408  | 4.316880  | -0.150498 |
| 32 | 6  | 0 | 1.109333  | 2.582223  | -1.593524 |
| 33 | 1  | 0 | 2.154848  | 0.738724  | -2.130139 |
| 34 | 1  | 0 | 0.548121  | 0.890234  | -2.826327 |
| 35 | 6  | 0 | -0.929997 | 4.748879  | 0.784339  |
| 36 | 1  | 0 | -2.564802 | 4.147718  | 2.060946  |
| 37 | 1  | 0 | 0.716541  | 5.027156  | -0.570312 |
| 38 | 1  | 0 | 2.091603  | 2.913123  | -1.233872 |
| 39 | 1  | 0 | 0.939750  | 3.139852  | -2.524843 |
| 40 | 1  | 0 | -0.953273 | 5.790990  | 1.091823  |
| 41 | 1  | 0 | -1.418034 | 0.499293  | -1.403396 |
| 42 | 1  | 0 | -1.086681 | -0.090631 | 1.546980  |
| 43 | 6  | 0 | -2.870036 | -0.531753 | 0.547921  |
| 44 | 8  | 0 | -3.525081 | -0.528553 | 1.568093  |

|    |   |   |           |           |           |
|----|---|---|-----------|-----------|-----------|
| 45 | 8 | 0 | -3.388317 | -0.534574 | -0.692342 |
| 46 | 6 | 0 | -4.832490 | -0.621863 | -0.795546 |
| 47 | 1 | 0 | -5.273491 | -0.033260 | 0.012613  |
| 48 | 1 | 0 | -5.058713 | -0.149654 | -1.754854 |
| 49 | 6 | 0 | -5.306917 | -2.065498 | -0.754234 |
| 50 | 1 | 0 | -5.063624 | -2.523109 | 0.207720  |
| 51 | 1 | 0 | -6.394089 | -2.097004 | -0.893657 |
| 52 | 1 | 0 | -4.835835 | -2.653505 | -1.547466 |

1n

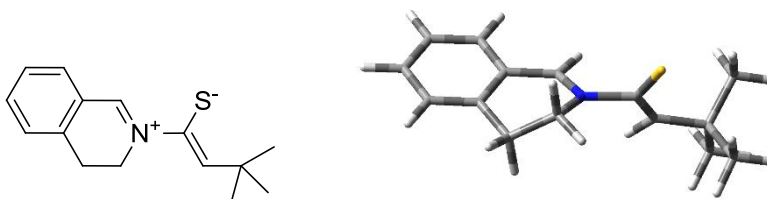

| Center Number | Atomic Number | Atomic Type | Coordinates (Angstroms) |           |           |
|---------------|---------------|-------------|-------------------------|-----------|-----------|
|               |               |             | X                       | Y         | Z         |
| 1             | 6             | 0           | 3.069197                | 1.527943  | -0.893102 |
| 2             | 6             | 0           | 2.298224                | 0.538027  | -0.259062 |
| 3             | 6             | 0           | 2.915305                | -0.423237 | 0.573512  |
| 4             | 6             | 0           | 4.297200                | -0.385850 | 0.737847  |
| 5             | 6             | 0           | 5.061533                | 0.592717  | 0.094424  |
| 6             | 6             | 0           | 4.448733                | 1.551528  | -0.718697 |
| 7             | 1             | 0           | 2.581214                | 2.263418  | -1.527544 |
| 8             | 1             | 0           | 4.782452                | -1.121292 | 1.374638  |
| 9             | 1             | 0           | 6.139151                | 0.608366  | 0.230999  |
| 10            | 1             | 0           | 5.046917                | 2.310377  | -1.213872 |
| 11            | 6             | 0           | 2.009797                | -1.404897 | 1.280543  |
| 12            | 1             | 0           | 1.676112                | -0.970742 | 2.234880  |
| 13            | 1             | 0           | 2.546188                | -2.327842 | 1.525068  |
| 14            | 6             | 0           | 0.862544                | 0.500956  | -0.427089 |
| 15            | 1             | 0           | 0.338503                | 1.328262  | -0.893876 |
| 16            | 7             | 0           | 0.126675                | -0.509319 | -0.049104 |
| 17            | 6             | 0           | 0.795053                | -1.752536 | 0.420641  |
| 18            | 1             | 0           | 0.045559                | -2.331107 | 0.960311  |
| 19            | 1             | 0           | 1.083041                | -2.326503 | -0.464083 |
| 20            | 6             | 0           | -1.330797               | -0.520773 | -0.274519 |
| 21            | 16            | 0           | -1.831093               | -1.839457 | -1.257688 |
| 22            | 6             | 0           | -1.969864               | 0.502921  | 0.356568  |
| 23            | 1             | 0           | -1.357545               | 1.158296  | 0.975319  |
| 24            | 6             | 0           | -3.461617               | 0.805019  | 0.351404  |

|    |   |   |           |           |           |
|----|---|---|-----------|-----------|-----------|
| 25 | 6 | 0 | -3.967588 | 1.062208  | -1.086776 |
| 26 | 1 | 0 | -5.040247 | 1.295575  | -1.074682 |
| 27 | 1 | 0 | -3.442499 | 1.912461  | -1.539542 |
| 28 | 1 | 0 | -3.807480 | 0.185215  | -1.719112 |
| 29 | 6 | 0 | -3.699531 | 2.073780  | 1.195766  |
| 30 | 1 | 0 | -3.158291 | 2.934505  | 0.781796  |
| 31 | 1 | 0 | -4.765488 | 2.328731  | 1.219060  |
| 32 | 1 | 0 | -3.365784 | 1.931964  | 2.231714  |
| 33 | 6 | 0 | -4.251192 | -0.368917 | 0.975799  |
| 34 | 1 | 0 | -4.078708 | -1.293439 | 0.417858  |
| 35 | 1 | 0 | -3.947384 | -0.532643 | 2.016935  |
| 36 | 1 | 0 | -5.326940 | -0.150403 | 0.967321  |

**TS1-endo-n**

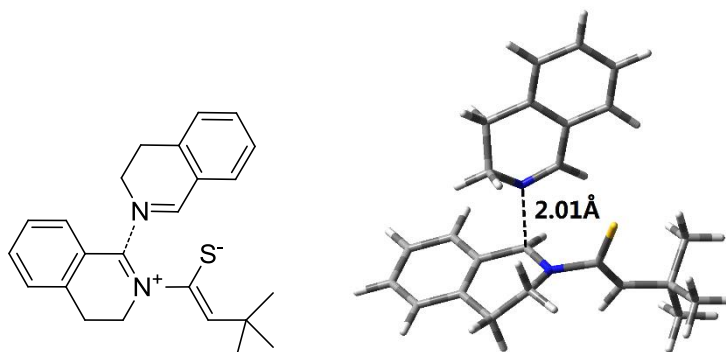

| Center Number | Atomic Number | Atomic Type | Coordinates (Angstroms) |           |           |
|---------------|---------------|-------------|-------------------------|-----------|-----------|
|               |               |             | X                       | Y         | Z         |
| 1             | 6             | 0           | -0.700062               | -2.952006 | -0.230030 |
| 2             | 6             | 0           | -0.294340               | -1.865233 | 0.466493  |
| 3             | 16            | 0           | 1.191550                | -1.487227 | 1.300855  |
| 4             | 7             | 0           | -1.287655               | -0.775497 | 0.520357  |
| 5             | 6             | 0           | -1.386527               | 0.091045  | -0.489869 |
| 6             | 6             | 0           | -1.817172               | -0.379809 | 1.837488  |
| 7             | 6             | 0           | -2.495570               | 1.074209  | -0.489905 |
| 8             | 6             | 0           | -3.269129               | 0.072064  | 1.684662  |
| 9             | 1             | 0           | -1.733974               | -1.247537 | 2.492395  |
| 10            | 1             | 0           | -1.196051               | 0.415459  | 2.266650  |
| 11            | 6             | 0           | -2.646476               | 1.962022  | -1.564300 |
| 12            | 6             | 0           | -3.422320               | 1.080440  | 0.567400  |
| 13            | 1             | 0           | -3.899713               | -0.803031 | 1.469542  |
| 14            | 1             | 0           | -3.625860               | 0.491629  | 2.632528  |
| 15            | 6             | 0           | -3.710129               | 2.858687  | -1.592610 |
| 16            | 1             | 0           | -1.913712               | 1.950331  | -2.366891 |

|    |   |   |           |           |           |
|----|---|---|-----------|-----------|-----------|
| 17 | 6 | 0 | -4.485603 | 1.988436  | 0.527493  |
| 18 | 6 | 0 | -4.631432 | 2.872289  | -0.540731 |
| 19 | 1 | 0 | -3.822122 | 3.544249  | -2.427699 |
| 20 | 1 | 0 | -5.205524 | 1.999500  | 1.342580  |
| 21 | 1 | 0 | -5.462354 | 3.572373  | -0.553889 |
| 22 | 1 | 0 | -1.722161 | -2.920077 | -0.609208 |
| 23 | 1 | 0 | -1.072042 | -0.305122 | -1.449919 |
| 24 | 7 | 0 | 0.216690  | 1.299124  | -0.469999 |
| 25 | 6 | 0 | 1.338296  | 0.674586  | -0.658233 |
| 26 | 6 | 0 | 0.248561  | 2.490744  | 0.380826  |
| 27 | 6 | 0 | 2.648910  | 1.249075  | -0.334676 |
| 28 | 1 | 0 | 1.312653  | -0.246589 | -1.234241 |
| 29 | 6 | 0 | 1.426720  | 3.402872  | 0.023089  |
| 30 | 1 | 0 | -0.701678 | 3.020660  | 0.272927  |
| 31 | 1 | 0 | 0.337828  | 2.162101  | 1.428369  |
| 32 | 6 | 0 | 3.818658  | 0.480845  | -0.419308 |
| 33 | 6 | 0 | 2.718515  | 2.615660  | -0.000736 |
| 34 | 1 | 0 | 1.249735  | 3.854044  | -0.965299 |
| 35 | 1 | 0 | 1.486012  | 4.229649  | 0.740460  |
| 36 | 6 | 0 | 5.055494  | 1.064972  | -0.165983 |
| 37 | 1 | 0 | 3.740159  | -0.577641 | -0.650173 |
| 38 | 6 | 0 | 3.965769  | 3.190220  | 0.247623  |
| 39 | 6 | 0 | 5.128399  | 2.421260  | 0.168079  |
| 40 | 1 | 0 | 5.960525  | 0.466861  | -0.221059 |
| 41 | 1 | 0 | 4.028390  | 4.244546  | 0.507716  |
| 42 | 1 | 0 | 6.092677  | 2.879468  | 0.371278  |
| 43 | 6 | 0 | 0.071720  | -4.233671 | -0.527839 |
| 44 | 6 | 0 | 0.434667  | -4.967210 | 0.783579  |
| 45 | 1 | 0 | 0.982752  | -5.893930 | 0.566450  |
| 46 | 1 | 0 | 1.057145  | -4.334733 | 1.422515  |
| 47 | 1 | 0 | -0.470718 | -5.232962 | 1.342756  |
| 48 | 6 | 0 | 1.360482  | -3.935726 | -1.326493 |
| 49 | 1 | 0 | 1.899593  | -4.866547 | -1.547099 |
| 50 | 1 | 0 | 1.123435  | -3.450607 | -2.282181 |
| 51 | 1 | 0 | 2.023763  | -3.277543 | -0.758195 |
| 52 | 6 | 0 | -0.832284 | -5.152265 | -1.375836 |
| 53 | 1 | 0 | -0.318944 | -6.091379 | -1.614601 |
| 54 | 1 | 0 | -1.757157 | -5.401865 | -0.840317 |
| 55 | 1 | 0 | -1.111566 | -4.672099 | -2.322676 |

---

**C-endo-n**

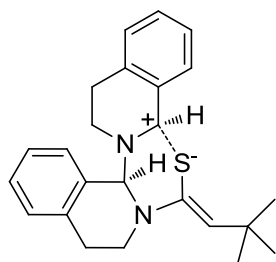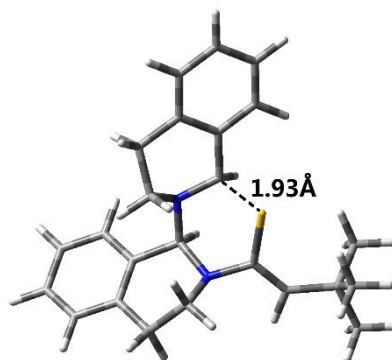

| Center Number | Atomic Number | Atomic Type | Coordinates (Angstroms) |           |           |
|---------------|---------------|-------------|-------------------------|-----------|-----------|
|               |               |             | X                       | Y         | Z         |
| 1             | 6             | 0           | -1.450939               | -2.759721 | 0.173586  |
| 2             | 6             | 0           | -0.872203               | -1.589345 | -0.148683 |
| 3             | 16            | 0           | -1.774779               | -0.092421 | -0.615096 |
| 4             | 7             | 0           | 0.555421                | -1.518912 | -0.196794 |
| 5             | 6             | 0           | 1.151654                | -0.424522 | 0.571514  |
| 6             | 6             | 0           | 1.182006                | -1.797999 | -1.495375 |
| 7             | 6             | 0           | 2.671809                | -0.484201 | 0.539881  |
| 8             | 6             | 0           | 2.611613                | -2.278458 | -1.247816 |
| 9             | 1             | 0           | 0.597813                | -2.583396 | -1.981792 |
| 10            | 1             | 0           | 1.178442                | -0.927142 | -2.170061 |
| 11            | 6             | 0           | 3.388068                | 0.353745  | 1.406160  |
| 12            | 6             | 0           | 3.364707                | -1.351122 | -0.318143 |
| 13            | 1             | 0           | 2.570157                | -3.282046 | -0.801653 |
| 14            | 1             | 0           | 3.147870                | -2.376067 | -2.200444 |
| 15            | 6             | 0           | 4.779227                | 0.334038  | 1.432421  |
| 16            | 1             | 0           | 2.837614                | 1.030388  | 2.054502  |
| 17            | 6             | 0           | 4.766902                | -1.358400 | -0.286371 |
| 18            | 6             | 0           | 5.473510                | -0.528630 | 0.579297  |
| 19            | 1             | 0           | 5.320062                | 0.986431  | 2.112652  |
| 20            | 1             | 0           | 5.305154                | -2.026588 | -0.955539 |
| 21            | 1             | 0           | 6.560101                | -0.550580 | 0.587552  |
| 22            | 1             | 0           | -0.733473               | -3.553990 | 0.382594  |
| 23            | 1             | 0           | 0.825112                | -0.586058 | 1.608230  |
| 24            | 7             | 0           | 0.678231                | 0.944787  | 0.260357  |
| 25            | 6             | 0           | -0.723490               | 1.095734  | 0.490855  |
| 26            | 6             | 0           | 1.127564                | 1.591102  | -0.977476 |
| 27            | 6             | 0           | -1.231960               | 2.501124  | 0.274517  |
| 28            | 1             | 0           | -0.950509               | 0.761735  | 1.508251  |
| 29            | 6             | 0           | 0.962218                | 3.103435  | -0.825498 |
| 30            | 1             | 0           | 2.177016                | 1.339120  | -1.141993 |
| 31            | 1             | 0           | 0.549993                | 1.238817  | -1.847009 |

|    |   |   |           |           |           |
|----|---|---|-----------|-----------|-----------|
| 32 | 6 | 0 | -2.513247 | 2.847753  | 0.724752  |
| 33 | 6 | 0 | -0.433227 | 3.463773  | -0.363033 |
| 34 | 1 | 0 | 1.697638  | 3.468405  | -0.094847 |
| 35 | 1 | 0 | 1.186086  | 3.601018  | -1.777652 |
| 36 | 6 | 0 | -3.005944 | 4.137394  | 0.548158  |
| 37 | 1 | 0 | -3.126046 | 2.093457  | 1.212451  |
| 38 | 6 | 0 | -0.941162 | 4.757717  | -0.536247 |
| 39 | 6 | 0 | -2.215087 | 5.097885  | -0.088036 |
| 40 | 1 | 0 | -4.000394 | 4.392545  | 0.903808  |
| 41 | 1 | 0 | -0.324523 | 5.504473  | -1.032303 |
| 42 | 1 | 0 | -2.591283 | 6.106865  | -0.235022 |
| 43 | 6 | 0 | -2.919815 | -3.164565 | 0.278313  |
| 44 | 6 | 0 | -3.660345 | -2.967993 | -1.064205 |
| 45 | 1 | 0 | -4.690574 | -3.338040 | -0.985851 |
| 46 | 1 | 0 | -3.703154 | -1.913720 | -1.352221 |
| 47 | 1 | 0 | -3.164091 | -3.520749 | -1.870562 |
| 48 | 6 | 0 | -3.632798 | -2.366520 | 1.394355  |
| 49 | 1 | 0 | -4.677073 | -2.691943 | 1.483031  |
| 50 | 1 | 0 | -3.145405 | -2.529503 | 2.362793  |
| 51 | 1 | 0 | -3.625251 | -1.294012 | 1.182877  |
| 52 | 6 | 0 | -2.965965 | -4.664265 | 0.643155  |
| 53 | 1 | 0 | -4.002157 | -5.007324 | 0.743239  |
| 54 | 1 | 0 | -2.482430 | -5.275394 | -0.129058 |
| 55 | 1 | 0 | -2.454365 | -4.856838 | 1.594135  |

**TS2-Si-n**

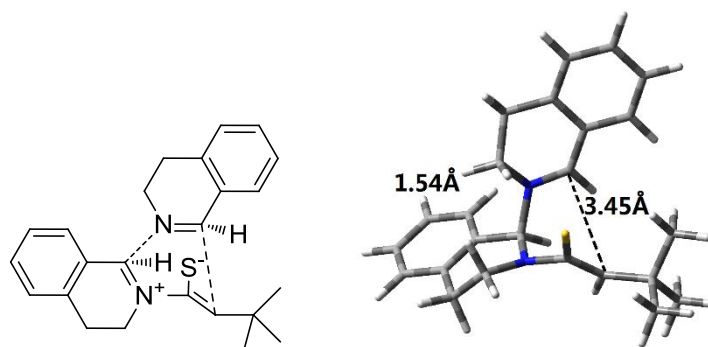

| Center Number | Atomic Number | Atomic Type | Coordinates (Angstroms) |          |           |
|---------------|---------------|-------------|-------------------------|----------|-----------|
|               |               |             | X                       | Y        | Z         |
| 1             | 6             | 0           | -0.820937               | 2.393542 | -0.496889 |
| 2             | 6             | 0           | -0.355464               | 1.726562 | 0.602807  |
| 3             | 16            | 0           | -1.162925               | 1.328083 | 2.091391  |
| 4             | 7             | 0           | 1.031496                | 1.271451 | 0.473795  |

|    |   |   |            |            |            |
|----|---|---|------------|------------|------------|
| 5  | 6 | 0 | 1. 296719  | 0. 270722  | -0. 494599 |
| 6  | 6 | 0 | 1. 907727  | 1. 350843  | 1. 645658  |
| 7  | 6 | 0 | 2. 747802  | -0. 163922 | -0. 590981 |
| 8  | 6 | 0 | 3. 350251  | 1. 528960  | 1. 173746  |
| 9  | 1 | 0 | 1. 573640  | 2. 207679  | 2. 231574  |
| 10 | 1 | 0 | 1. 825883  | 0. 476685  | 2. 306307  |
| 11 | 6 | 0 | 3. 100683  | -1. 156928 | -1. 515306 |
| 12 | 6 | 0 | 3. 738005  | 0. 448931  | 0. 191122  |
| 13 | 1 | 0 | 3. 450863  | 2. 513668  | 0. 696208  |
| 14 | 1 | 0 | 4. 031372  | 1. 519483  | 2. 033658  |
| 15 | 6 | 0 | 4. 427416  | -1. 549912 | -1. 665551 |
| 16 | 1 | 0 | 2. 326586  | -1. 624777 | -2. 119312 |
| 17 | 6 | 0 | 5. 070087  | 0. 043362  | 0. 031141  |
| 18 | 6 | 0 | 5. 417450  | -0. 944741 | -0. 886379 |
| 19 | 1 | 0 | 4. 688878  | -2. 320196 | -2. 385664 |
| 20 | 1 | 0 | 5. 839538  | 0. 512096  | 0. 640357  |
| 21 | 1 | 0 | 6. 456252  | -1. 245286 | -0. 993414 |
| 22 | 1 | 0 | -0. 084530 | 2. 589655  | -1. 278997 |
| 23 | 1 | 0 | 0. 953312  | 0. 602990  | -1. 479938 |
| 24 | 7 | 0 | 0. 401261  | -0. 960982 | -0. 244445 |
| 25 | 6 | 0 | -0. 741243 | -1. 033608 | -0. 880402 |
| 26 | 6 | 0 | 0. 565242  | -1. 694188 | 1. 033651  |
| 27 | 6 | 0 | -1. 793530 | -1. 947282 | -0. 511416 |
| 28 | 1 | 0 | -0. 878144 | -0. 363193 | -1. 722494 |
| 29 | 6 | 0 | -0. 111017 | -3. 062202 | 0. 967746  |
| 30 | 1 | 0 | 1. 636337  | -1. 797117 | 1. 215339  |
| 31 | 1 | 0 | 0. 115936  | -1. 057661 | 1. 810721  |
| 32 | 6 | 0 | -3. 064088 | -1. 853271 | -1. 106413 |
| 33 | 6 | 0 | -1. 522345 | -2. 958592 | 0. 437877  |
| 34 | 1 | 0 | 0. 469426  | -3. 736654 | 0. 319700  |
| 35 | 1 | 0 | -0. 103080 | -3. 504850 | 1. 969260  |
| 36 | 6 | 0 | -4. 067404 | -2. 744826 | -0. 746155 |
| 37 | 1 | 0 | -3. 260556 | -1. 065656 | -1. 827988 |
| 38 | 6 | 0 | -2. 536127 | -3. 847466 | 0. 782723  |
| 39 | 6 | 0 | -3. 802708 | -3. 739807 | 0. 200294  |
| 40 | 1 | 0 | -5. 053501 | -2. 663564 | -1. 192923 |
| 41 | 1 | 0 | -2. 339857 | -4. 628371 | 1. 513048  |
| 42 | 1 | 0 | -4. 586473 | -4. 434930 | 0. 488032  |
| 43 | 6 | 0 | -2. 175886 | 3. 058499  | -0. 714660 |
| 44 | 6 | 0 | -2. 385478 | 4. 188521  | 0. 321835  |
| 45 | 1 | 0 | -3. 353193 | 4. 683821  | 0. 162876  |
| 46 | 1 | 0 | -2. 358941 | 3. 786228  | 1. 338246  |
| 47 | 1 | 0 | -1. 597841 | 4. 946419  | 0. 231638  |
| 48 | 6 | 0 | -2. 185238 | 3. 677838  | -2. 127889 |



|    |   |   |           |          |           |
|----|---|---|-----------|----------|-----------|
| 49 | 1 | 0 | -2.037510 | 2.910203 | -2.899783 |
| 50 | 1 | 0 | -3.140472 | 4.177368 | -2.330237 |
| 51 | 1 | 0 | -1.386778 | 4.422278 | -2.240204 |
| 52 | 6 | 0 | -3.343086 | 2.052737 | -0.613250 |
| 53 | 1 | 0 | -3.273807 | 1.299727 | -1.410234 |
| 54 | 1 | 0 | -3.330462 | 1.541211 | 0.352788  |
| 55 | 1 | 0 | -4.306370 | 2.567495 | -0.728516 |

---

**7n**

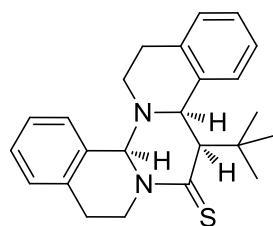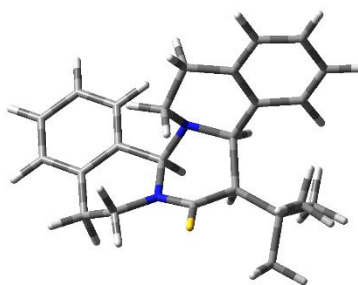


---

| Center Number | Atomic Number | Atomic Type | Coordinates (Angstroms) |           |           |
|---------------|---------------|-------------|-------------------------|-----------|-----------|
|               |               |             | X                       | Y         | Z         |
| 1             | 6             | 0           | 0.999368                | -1.220540 | -0.602393 |
| 2             | 6             | 0           | 0.099245                | -1.636830 | 0.567451  |
| 3             | 16            | 0           | 0.571678                | -2.391138 | 1.987344  |
| 4             | 7             | 0           | -1.201090               | -1.291186 | 0.327583  |
| 5             | 6             | 0           | -1.406100               | -0.129361 | -0.598664 |
| 6             | 6             | 0           | -2.267963               | -1.677950 | 1.254413  |
| 7             | 6             | 0           | -2.821556               | 0.432665  | -0.564945 |
| 8             | 6             | 0           | -3.616207               | -1.671059 | 0.537924  |
| 9             | 1             | 0           | -2.024296               | -2.672265 | 1.631894  |
| 10            | 1             | 0           | -2.285075               | -1.003717 | 2.122667  |
| 11            | 6             | 0           | -3.057485               | 1.693665  | -1.128776 |
| 12            | 6             | 0           | -3.895400               | -0.320116 | -0.070460 |
| 13            | 1             | 0           | -3.614038               | -2.451144 | -0.237154 |
| 14            | 1             | 0           | -4.402477               | -1.940386 | 1.252256  |
| 15            | 6             | 0           | -4.350068               | 2.208471  | -1.193902 |
| 16            | 1             | 0           | -2.213698               | 2.265578  | -1.501593 |
| 17            | 6             | 0           | -5.189821               | 0.209515  | -0.136507 |
| 18            | 6             | 0           | -5.422096               | 1.463502  | -0.696406 |
| 19            | 1             | 0           | -4.520016               | 3.189477  | -1.629112 |
| 20            | 1             | 0           | -6.019362               | -0.370799 | 0.261351  |
| 21            | 1             | 0           | -6.432593               | 1.860920  | -0.739347 |
| 22            | 1             | 0           | 0.390051                | -1.504042 | -1.470303 |
| 23            | 1             | 0           | -1.236653               | -0.480526 | -1.625158 |

|    |   |   |           |           |           |
|----|---|---|-----------|-----------|-----------|
| 24 | 7 | 0 | -0.390164 | 0.878215  | -0.324849 |
| 25 | 6 | 0 | 0.944991  | 0.409563  | -0.767123 |
| 26 | 6 | 0 | -0.444369 | 1.309838  | 1.087800  |
| 27 | 6 | 0 | 2.046813  | 1.343604  | -0.236213 |
| 28 | 1 | 0 | 0.960483  | 0.542050  | -1.856321 |
| 29 | 6 | 0 | 0.407928  | 2.546601  | 1.279856  |
| 30 | 1 | 0 | -1.489198 | 1.527055  | 1.325360  |
| 31 | 1 | 0 | -0.101570 | 0.524429  | 1.776546  |
| 32 | 6 | 0 | 3.317732  | 1.342657  | -0.837562 |
| 33 | 6 | 0 | 1.795385  | 2.334681  | 0.731580  |
| 34 | 1 | 0 | -0.057629 | 3.395918  | 0.759979  |
| 35 | 1 | 0 | 0.448836  | 2.809269  | 2.344200  |
| 36 | 6 | 0 | 4.329049  | 2.212663  | -0.442692 |
| 37 | 1 | 0 | 3.530121  | 0.653528  | -1.642979 |
| 38 | 6 | 0 | 2.821895  | 3.200411  | 1.136029  |
| 39 | 6 | 0 | 4.089222  | 3.140876  | 0.570907  |
| 40 | 1 | 0 | 5.298162  | 2.166796  | -0.932028 |
| 41 | 1 | 0 | 2.602276  | 3.943807  | 1.899577  |
| 42 | 1 | 0 | 4.871217  | 3.820702  | 0.898129  |
| 43 | 6 | 0 | 2.297984  | -2.065318 | -0.883248 |
| 44 | 6 | 0 | 1.929331  | -3.572214 | -0.856995 |
| 45 | 1 | 0 | 2.761137  | -4.152478 | -1.274304 |
| 46 | 1 | 0 | 1.737374  | -3.932158 | 0.153802  |
| 47 | 1 | 0 | 1.043335  | -3.779043 | -1.471950 |
| 48 | 6 | 0 | 2.731131  | -1.799654 | -2.349161 |
| 49 | 1 | 0 | 2.905599  | -0.749301 | -2.588253 |
| 50 | 1 | 0 | 3.658346  | -2.342516 | -2.565211 |
| 51 | 1 | 0 | 1.967922  | -2.164951 | -3.048746 |
| 52 | 6 | 0 | 3.474679  | -1.850248 | 0.089213  |
| 53 | 1 | 0 | 3.863987  | -0.831831 | 0.072268  |
| 54 | 1 | 0 | 3.172152  | -2.082386 | 1.112317  |
| 55 | 1 | 0 | 4.295395  | -2.525515 | -0.185289 |

4n

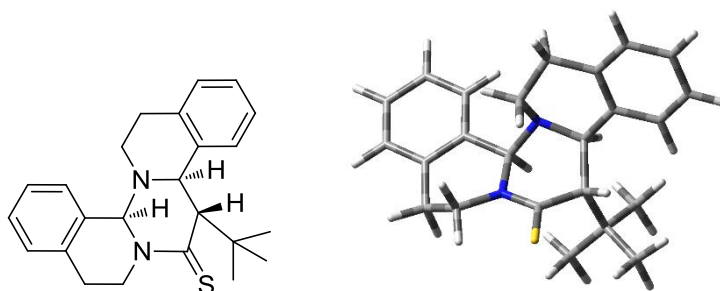

| Center<br>Number | Atomic<br>Number | Atomic<br>Type | Coordinates (Angstroms) |           |           |
|------------------|------------------|----------------|-------------------------|-----------|-----------|
|                  |                  |                | X                       | Y         | Z         |
| 1                | 6                | 0              | -1.212797               | 1.203729  | -0.088350 |
| 2                | 6                | 0              | -0.130574               | 1.496154  | 0.952250  |
| 3                | 16               | 0              | -0.495897               | 2.382910  | 2.331831  |
| 4                | 7                | 0              | 1.106214                | 1.020981  | 0.673002  |
| 5                | 6                | 0              | 1.216611                | -0.027312 | -0.394508 |
| 6                | 6                | 0              | 2.240088                | 1.284932  | 1.564835  |
| 7                | 6                | 0              | 2.587128                | -0.689882 | -0.454265 |
| 8                | 6                | 0              | 3.553797                | 1.255894  | 0.787778  |
| 9                | 1                | 0              | 2.070725                | 2.259089  | 2.025134  |
| 10               | 1                | 0              | 2.255382                | 0.543105  | 2.375883  |
| 11               | 6                | 0              | 2.721532                | -1.906837 | -1.135256 |
| 12               | 6                | 0              | 3.724156                | -0.056639 | 0.066801  |
| 13               | 1                | 0              | 3.566171                | 2.092316  | 0.073923  |
| 14               | 1                | 0              | 4.383660                | 1.424961  | 1.483266  |
| 15               | 6                | 0              | 3.973452                | -2.499236 | -1.285947 |
| 16               | 1                | 0              | 1.831824                | -2.381195 | -1.536829 |
| 17               | 6                | 0              | 4.976373                | -0.663595 | -0.084776 |
| 18               | 6                | 0              | 5.106581                | -1.876217 | -0.757980 |
| 19               | 1                | 0              | 4.063799                | -3.445415 | -1.812472 |
| 20               | 1                | 0              | 5.854319                | -0.176384 | 0.333547  |
| 21               | 1                | 0              | 6.085639                | -2.334951 | -0.866999 |
| 22               | 1                | 0              | 1.068361                | 0.482043  | -1.356235 |
| 23               | 7                | 0              | 0.128160                | -0.972587 | -0.275852 |
| 24               | 6                | 0              | -1.133393               | -0.292999 | -0.629931 |
| 25               | 6                | 0              | 0.093379                | -1.695373 | 1.003463  |
| 26               | 6                | 0              | -2.358511               | -1.118596 | -0.233830 |
| 27               | 1                | 0              | -1.131447               | -0.248824 | -1.722368 |
| 28               | 6                | 0              | -0.890371               | -2.850886 | 0.875741  |
| 29               | 1                | 0              | 1.100359                | -2.069666 | 1.207218  |
| 30               | 1                | 0              | -0.199962               | -1.047652 | 1.846239  |
| 31               | 6                | 0              | -3.637304               | -0.665500 | -0.594487 |
| 32               | 6                | 0              | -2.246898               | -2.341970 | 0.448191  |
| 33               | 1                | 0              | -0.503222               | -3.568556 | 0.138995  |
| 34               | 1                | 0              | -0.971171               | -3.384162 | 1.830876  |
| 35               | 6                | 0              | -4.780433               | -1.403328 | -0.301207 |
| 36               | 1                | 0              | -3.745044               | 0.283573  | -1.111074 |
| 37               | 6                | 0              | -3.403929               | -3.075194 | 0.744888  |
| 38               | 6                | 0              | -4.664817               | -2.620778 | 0.372422  |
| 39               | 1                | 0              | -5.756758               | -1.026887 | -0.594129 |
| 40               | 1                | 0              | -3.304118               | -4.014914 | 1.284254  |
| 41               | 1                | 0              | -5.549653               | -3.203858 | 0.612994  |

|    |   |   |           |          |           |
|----|---|---|-----------|----------|-----------|
| 42 | 1 | 0 | -2.147868 | 1.281742 | 0.463605  |
| 43 | 6 | 0 | -1.285290 | 2.386166 | -1.190734 |
| 44 | 6 | 0 | -2.356777 | 3.383605 | -0.696053 |
| 45 | 1 | 0 | -2.417219 | 4.248384 | -1.368271 |
| 46 | 1 | 0 | -3.348050 | 2.914463 | -0.664907 |
| 47 | 1 | 0 | -2.123652 | 3.742443 | 0.310864  |
| 48 | 6 | 0 | 0.038342  | 3.164249 | -1.361130 |
| 49 | 1 | 0 | 0.363485  | 3.627035 | -0.425096 |
| 50 | 1 | 0 | 0.853258  | 2.535897 | -1.737750 |
| 51 | 1 | 0 | -0.110307 | 3.967476 | -2.092615 |
| 52 | 6 | 0 | -1.705436 | 1.890008 | -2.590842 |
| 53 | 1 | 0 | -2.625799 | 1.297140 | -2.576802 |
| 54 | 1 | 0 | -1.892090 | 2.759896 | -3.231482 |
| 55 | 1 | 0 | -0.926353 | 1.295221 | -3.081540 |

**TS1-exo-n**

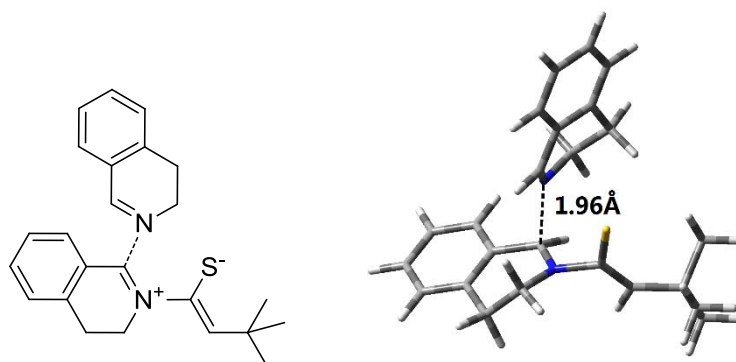

| Center Number | Atomic Number | Atomic Type | Coordinates (Angstroms) |           |           |
|---------------|---------------|-------------|-------------------------|-----------|-----------|
|               |               |             | X                       | Y         | Z         |
| 1             | 6             | 0           | -0.109230               | 2.879538  | 0.152394  |
| 2             | 6             | 0           | 0.001196                | 1.741665  | -0.570265 |
| 3             | 16            | 0           | 1.320871                | 1.054667  | -1.488062 |
| 4             | 7             | 0           | -1.207320               | 0.898970  | -0.586515 |
| 5             | 6             | 0           | -1.476165               | 0.114248  | 0.466565  |
| 6             | 6             | 0           | -1.841353               | 0.621031  | -1.888973 |
| 7             | 6             | 0           | -2.721621               | -0.700357 | 0.447461  |
| 8             | 6             | 0           | -3.346627               | 0.461391  | -1.691770 |
| 9             | 1             | 0           | -1.607894               | 1.464432  | -2.539695 |
| 10            | 1             | 0           | -1.414189               | -0.274704 | -2.353380 |
| 11            | 6             | 0           | -3.004576               | -1.583311 | 1.498623  |
| 12            | 6             | 0           | -3.646845               | -0.537833 | -0.598329 |
| 13            | 1             | 0           | -3.781260               | 1.436125  | -1.426050 |
| 14            | 1             | 0           | -3.812882               | 0.152832  | -2.634593 |

|    |   |   |           |           |           |
|----|---|---|-----------|-----------|-----------|
| 15 | 6 | 0 | -4.190770 | -2.309157 | 1.513213  |
| 16 | 1 | 0 | -2.282053 | -1.707526 | 2.300387  |
| 17 | 6 | 0 | -4.835106 | -1.276375 | -0.574755 |
| 18 | 6 | 0 | -5.108747 | -2.157031 | 0.469472  |
| 19 | 1 | 0 | -4.399424 | -2.993213 | 2.330814  |
| 20 | 1 | 0 | -5.550441 | -1.155576 | -1.384972 |
| 21 | 1 | 0 | -6.035116 | -2.724974 | 0.470773  |
| 22 | 1 | 0 | -1.094632 | 3.079561  | 0.575768  |
| 23 | 1 | 0 | -1.190567 | 0.547139  | 1.421110  |
| 24 | 7 | 0 | -0.040106 | -1.198162 | 0.684396  |
| 25 | 6 | 0 | 0.596733  | -1.544327 | -0.394784 |
| 26 | 6 | 0 | 0.688305  | -1.208610 | 1.959810  |
| 27 | 6 | 0 | 1.944148  | -2.117281 | -0.384783 |
| 28 | 1 | 0 | 0.030952  | -1.579414 | -1.319191 |
| 29 | 6 | 0 | 2.193734  | -0.964081 | 1.797093  |
| 30 | 1 | 0 | 0.248831  | -0.444337 | 2.611368  |
| 31 | 1 | 0 | 0.508614  | -2.181346 | 2.442128  |
| 32 | 6 | 0 | 2.411317  | -2.904914 | -1.444111 |
| 33 | 6 | 0 | 2.757171  | -1.882360 | 0.741197  |
| 34 | 1 | 0 | 2.350835  | 0.075572  | 1.477478  |
| 35 | 1 | 0 | 2.700554  | -1.098419 | 2.759398  |
| 36 | 6 | 0 | 3.683502  | -3.469625 | -1.382865 |
| 37 | 1 | 0 | 1.777346  | -3.069794 | -2.311877 |
| 38 | 6 | 0 | 4.028477  | -2.448359 | 0.789636  |
| 39 | 6 | 0 | 4.490254  | -3.242126 | -0.265184 |
| 40 | 1 | 0 | 4.047047  | -4.081303 | -2.203603 |
| 41 | 1 | 0 | 4.665338  | -2.266176 | 1.652145  |
| 42 | 1 | 0 | 5.483263  | -3.680582 | -0.214630 |
| 43 | 6 | 0 | 0.955381  | 3.934244  | 0.436921  |
| 44 | 6 | 0 | 0.329086  | 5.017118  | 1.340127  |
| 45 | 1 | 0 | 1.058503  | 5.803224  | 1.569212  |
| 46 | 1 | 0 | -0.532641 | 5.490708  | 0.852625  |
| 47 | 1 | 0 | -0.015703 | 4.591127  | 2.291369  |
| 48 | 6 | 0 | 1.433150  | 4.598365  | -0.874846 |
| 49 | 1 | 0 | 0.594968  | 5.075702  | -1.396926 |
| 50 | 1 | 0 | 2.183981  | 5.371187  | -0.662258 |
| 51 | 1 | 0 | 1.875353  | 3.857820  | -1.547139 |
| 52 | 6 | 0 | 2.165746  | 3.317051  | 1.172317  |
| 53 | 1 | 0 | 1.857052  | 2.882225  | 2.131840  |
| 54 | 1 | 0 | 2.626396  | 2.531194  | 0.566726  |
| 55 | 1 | 0 | 2.922859  | 4.084766  | 1.380017  |

---

**C-exo-n**

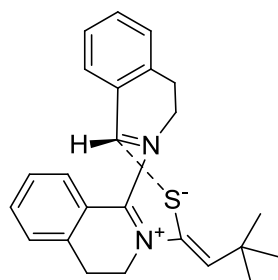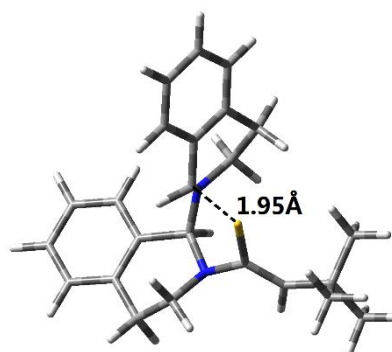

| Center Number | Atomic Number | Atomic Type | Coordinates (Angstroms) |           |           |
|---------------|---------------|-------------|-------------------------|-----------|-----------|
|               |               |             | X                       | Y         | Z         |
| 1             | 6             | 0           | -2.196964               | -2.106367 | 0.219536  |
| 2             | 6             | 0           | -1.209273               | -1.330264 | -0.260009 |
| 3             | 16            | 0           | -1.437700               | 0.225289  | -1.148809 |
| 4             | 7             | 0           | 0.146642                | -1.769381 | -0.132379 |
| 5             | 6             | 0           | 0.977541                | -0.934453 | 0.755954  |
| 6             | 6             | 0           | 0.743142                | -2.249631 | -1.384855 |
| 7             | 6             | 0           | 2.478690                | -1.120442 | 0.502011  |
| 8             | 6             | 0           | 2.013949                | -3.029847 | -1.066201 |
| 9             | 1             | 0           | 0.000858                | -2.896756 | -1.860885 |
| 10            | 1             | 0           | 0.972346                | -1.439231 | -2.098486 |
| 11            | 6             | 0           | 3.376559                | -0.269202 | 1.160406  |
| 12            | 6             | 0           | 2.978956                | -2.145745 | -0.315259 |
| 13            | 1             | 0           | 1.746400                | -3.910691 | -0.465757 |
| 14            | 1             | 0           | 2.474454                | -3.396364 | -1.991701 |
| 15            | 6             | 0           | 4.752094                | -0.435134 | 1.026060  |
| 16            | 1             | 0           | 2.985689                | 0.538832  | 1.771469  |
| 17            | 6             | 0           | 4.365313                | -2.299858 | -0.451073 |
| 18            | 6             | 0           | 5.251047                | -1.459525 | 0.217370  |
| 19            | 1             | 0           | 5.432509                | 0.235318  | 1.544280  |
| 20            | 1             | 0           | 4.747060                | -3.086208 | -1.098909 |
| 21            | 1             | 0           | 6.323194                | -1.593600 | 0.099946  |
| 22            | 1             | 0           | -1.838407               | -3.030521 | 0.672472  |
| 23            | 1             | 0           | 0.778648                | -1.273067 | 1.782705  |
| 24            | 7             | 0           | 0.603626                | 0.491811  | 0.751644  |
| 25            | 6             | 0           | 0.233986                | 1.012004  | -0.517745 |
| 26            | 6             | 0           | -0.013256               | 1.040178  | 1.969997  |
| 27            | 6             | 0           | 0.075648                | 2.505720  | -0.519496 |
| 28            | 1             | 0           | 0.975000                | 0.702754  | -1.258191 |
| 29            | 6             | 0           | -1.003296               | 2.186090  | 1.693271  |
| 30            | 1             | 0           | -0.537025               | 0.244152  | 2.515827  |
| 31            | 1             | 0           | 0.783130                | 1.410373  | 2.633032  |

|    |   |   |           |           |           |
|----|---|---|-----------|-----------|-----------|
| 32 | 6 | 0 | 0.508314  | 3.291221  | -1.589638 |
| 33 | 6 | 0 | -0.515054 | 3.105686  | 0.603469  |
| 34 | 1 | 0 | -1.965207 | 1.756802  | 1.386204  |
| 35 | 1 | 0 | -1.178815 | 2.736725  | 2.624313  |
| 36 | 6 | 0 | 0.357401  | 4.678458  | -1.547285 |
| 37 | 1 | 0 | 0.968531  | 2.817737  | -2.453844 |
| 38 | 6 | 0 | -0.649018 | 4.494203  | 0.644561  |
| 39 | 6 | 0 | -0.218501 | 5.279829  | -0.427377 |
| 40 | 1 | 0 | 0.696358  | 5.286657  | -2.381393 |
| 41 | 1 | 0 | -1.097546 | 4.963459  | 1.517474  |
| 42 | 1 | 0 | -0.329951 | 6.360085  | -0.385439 |
| 43 | 6 | 0 | -3.712637 | -1.922705 | 0.209424  |
| 44 | 6 | 0 | -4.340766 | -3.168963 | 0.869535  |
| 45 | 1 | 0 | -5.433716 | -3.087919 | 0.891006  |
| 46 | 1 | 0 | -4.081363 | -4.081693 | 0.319084  |
| 47 | 1 | 0 | -3.991321 | -3.288556 | 1.902418  |
| 48 | 6 | 0 | -4.254227 | -1.809670 | -1.234054 |
| 49 | 1 | 0 | -3.972464 | -2.686817 | -1.828122 |
| 50 | 1 | 0 | -5.349774 | -1.744819 | -1.224605 |
| 51 | 1 | 0 | -3.869456 | -0.920552 | -1.742999 |
| 52 | 6 | 0 | -4.128055 | -0.675518 | 1.022699  |
| 53 | 1 | 0 | -3.779651 | -0.752163 | 2.059529  |
| 54 | 1 | 0 | -3.716493 | 0.239622  | 0.587942  |
| 55 | 1 | 0 | -5.221215 | -0.581575 | 1.040928  |

**TS2-Re-n**

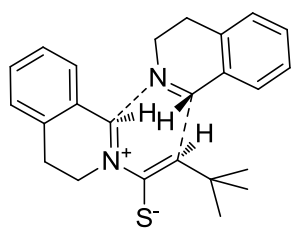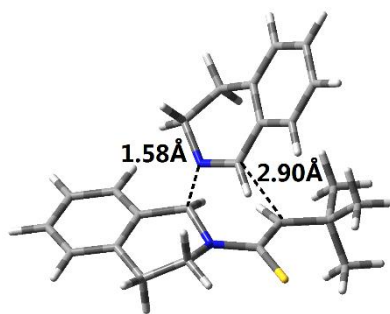

| Center Number | Atomic Number | Atomic Type | Coordinates (Angstroms) |           |           |
|---------------|---------------|-------------|-------------------------|-----------|-----------|
|               |               |             | X                       | Y         | Z         |
| 1             | 6             | 0           | -0.852962               | -1.695163 | 0.886826  |
| 2             | 6             | 0           | -0.109885               | -1.953353 | -0.253054 |
| 3             | 16            | 0           | -0.611208               | -2.977567 | -1.546422 |
| 4             | 7             | 0           | 1.145289                | -1.229014 | -0.414187 |
| 5             | 6             | 0           | 1.402591                | -0.065531 | 0.353856  |

|    |   |   |            |            |            |
|----|---|---|------------|------------|------------|
| 6  | 6 | 0 | 1. 802362  | -1. 197234 | -1. 733682 |
| 7  | 6 | 0 | 2. 864252  | 0. 367624  | 0. 358688  |
| 8  | 6 | 0 | 3. 315132  | -1. 160975 | -1. 589365 |
| 9  | 1 | 0 | 1. 474211  | -2. 079691 | -2. 279773 |
| 10 | 1 | 0 | 1. 468958  | -0. 313323 | -2. 301778 |
| 11 | 6 | 0 | 3. 354043  | 1. 164636  | 1. 406234  |
| 12 | 6 | 0 | 3. 768154  | -0. 116194 | -0. 600979 |
| 13 | 1 | 0 | 3. 668262  | -2. 142721 | -1. 242860 |
| 14 | 1 | 0 | 3. 772378  | -0. 991133 | -2. 572243 |
| 15 | 6 | 0 | 4. 685938  | 1. 569763  | 1. 447294  |
| 16 | 1 | 0 | 2. 699565  | 1. 442959  | 2. 228223  |
| 17 | 6 | 0 | 5. 104761  | 0. 299009  | -0. 554996 |
| 18 | 6 | 0 | 5. 563009  | 1. 152257  | 0. 445051  |
| 19 | 1 | 0 | 5. 038672  | 2. 191205  | 2. 265481  |
| 20 | 1 | 0 | 5. 795573  | -0. 073609 | -1. 308070 |
| 21 | 1 | 0 | 6. 603903  | 1. 463749  | 0. 461870  |
| 22 | 1 | 0 | 1. 109024  | -0. 217333 | 1. 392678  |
| 23 | 6 | 0 | -0. 707525 | 0. 726411  | -0. 693746 |
| 24 | 6 | 0 | -1. 879698 | 1. 573217  | -0. 735365 |
| 25 | 7 | 0 | 0. 412698  | 1. 091195  | -0. 080898 |
| 26 | 6 | 0 | -2. 882801 | 1. 349923  | -1. 697011 |
| 27 | 6 | 0 | -2. 025947 | 2. 608850  | 0. 214549  |
| 28 | 6 | 0 | 0. 422529  | 2. 393242  | 0. 616011  |
| 29 | 6 | 0 | -4. 012768 | 2. 160358  | -1. 721442 |
| 30 | 1 | 0 | -2. 764724 | 0. 540330  | -2. 411967 |
| 31 | 6 | 0 | -3. 163823 | 3. 408290  | 0. 180519  |
| 32 | 6 | 0 | -0. 932239 | 2. 733790  | 1. 244936  |
| 33 | 1 | 0 | 1. 205592  | 2. 383167  | 1. 368879  |
| 34 | 1 | 0 | 0. 697423  | 3. 157565  | -0. 122761 |
| 35 | 6 | 0 | -4. 152214 | 3. 190471  | -0. 785490 |
| 36 | 1 | 0 | -4. 786100 | 1. 990260  | -2. 464492 |
| 37 | 1 | 0 | -3. 284033 | 4. 205544  | 0. 910175  |
| 38 | 1 | 0 | -1. 132328 | 2. 045498  | 2. 080066  |
| 39 | 1 | 0 | -0. 892684 | 3. 744463  | 1. 666136  |
| 40 | 1 | 0 | -5. 033679 | 3. 825250  | -0. 805329 |
| 41 | 1 | 0 | -0. 685929 | -0. 141654 | -1. 338807 |
| 42 | 1 | 0 | -0. 368962 | -1. 143489 | 1. 689499  |
| 43 | 6 | 0 | -2. 173699 | -2. 314118 | 1. 345645  |
| 44 | 6 | 0 | -2. 002230 | -3. 832937 | 1. 594008  |
| 45 | 1 | 0 | -2. 938096 | -4. 265557 | 1. 973154  |
| 46 | 1 | 0 | -1. 727902 | -4. 344911 | 0. 668632  |
| 47 | 1 | 0 | -1. 217295 | -4. 020727 | 2. 336977  |
| 48 | 6 | 0 | -2. 552573 | -1. 643848 | 2. 685103  |
| 49 | 1 | 0 | -3. 494054 | -2. 051047 | 3. 072182  |



|    |   |   |           |           |           |
|----|---|---|-----------|-----------|-----------|
| 50 | 1 | 0 | -1.779471 | -1.808859 | 3.447126  |
| 51 | 1 | 0 | -2.681885 | -0.560076 | 2.562545  |
| 52 | 6 | 0 | -3.332849 | -2.080079 | 0.352793  |
| 53 | 1 | 0 | -4.255320 | -2.532913 | 0.739610  |
| 54 | 1 | 0 | -3.517519 | -1.007660 | 0.216082  |
| 55 | 1 | 0 | -3.109495 | -2.519934 | -0.621192 |

---

**8n**

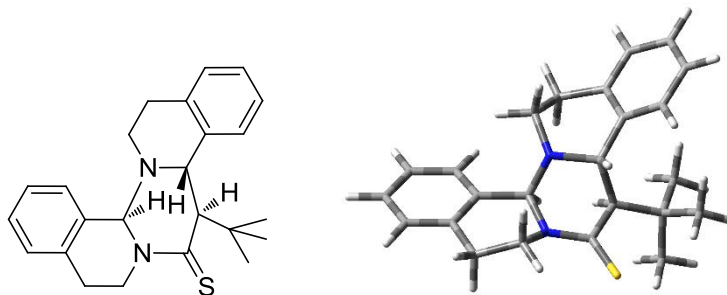

| Center Number | Atomic Number | Atomic Type | Coordinates (Angstroms) |           |           |
|---------------|---------------|-------------|-------------------------|-----------|-----------|
|               |               |             | X                       | Y         | Z         |
| 1             | 6             | 0           | 0.979781                | 1.056815  | 0.490334  |
| 2             | 6             | 0           | -0.100901               | 2.000719  | -0.071642 |
| 3             | 16            | 0           | 0.162480                | 3.535531  | -0.683328 |
| 4             | 7             | 0           | -1.307993               | 1.366808  | -0.197226 |
| 5             | 6             | 0           | -1.369602               | -0.037485 | 0.226581  |
| 6             | 6             | 0           | -2.215607               | 1.716205  | -1.305820 |
| 7             | 6             | 0           | -2.801534               | -0.574936 | 0.258788  |
| 8             | 6             | 0           | -3.668167               | 1.471361  | -0.940377 |
| 9             | 1             | 0           | -2.040760               | 2.759074  | -1.559568 |
| 10            | 1             | 0           | -1.927638               | 1.093728  | -2.165510 |
| 11            | 6             | 0           | -3.069167               | -1.730675 | 1.012872  |
| 12            | 6             | 0           | -3.879903               | 0.115450  | -0.314279 |
| 13            | 1             | 0           | -4.001159               | 2.244986  | -0.233895 |
| 14            | 1             | 0           | -4.286469               | 1.584460  | -1.839420 |
| 15            | 6             | 0           | -4.355490               | -2.251563 | 1.114383  |
| 16            | 1             | 0           | -2.259516               | -2.221991 | 1.546428  |
| 17            | 6             | 0           | -5.173069               | -0.416090 | -0.208841 |
| 18            | 6             | 0           | -5.415469               | -1.598742 | 0.481355  |
| 19            | 1             | 0           | -4.530698               | -3.152919 | 1.694931  |
| 20            | 1             | 0           | -5.999594               | 0.123857  | -0.665791 |
| 21            | 1             | 0           | -6.424855               | -1.995319 | 0.548433  |
| 22            | 1             | 0           | -1.068948               | -0.061205 | 1.283543  |
| 23            | 6             | 0           | 0.958997                | -0.077530 | -0.653390 |

|    |   |   |           |           |           |
|----|---|---|-----------|-----------|-----------|
| 24 | 6 | 0 | 2.097514  | -1.087089 | -0.635684 |
| 25 | 7 | 0 | -0.402688 | -0.747390 | -0.643462 |
| 26 | 6 | 0 | 3.264859  | -0.832503 | -1.366578 |
| 27 | 6 | 0 | 1.984482  | -2.308204 | 0.054808  |
| 28 | 6 | 0 | -0.364231 | -2.206241 | -0.552672 |
| 29 | 6 | 0 | 4.350537  | -1.705887 | -1.318211 |
| 30 | 1 | 0 | 3.323544  | 0.060665  | -1.981941 |
| 31 | 6 | 0 | 3.074272  | -3.182530 | 0.096799  |
| 32 | 6 | 0 | 0.610395  | -2.706107 | 0.533070  |
| 33 | 1 | 0 | -1.377795 | -2.573064 | -0.400827 |
| 34 | 1 | 0 | -0.033616 | -2.606702 | -1.519304 |
| 35 | 6 | 0 | 4.265963  | -2.874423 | -0.559327 |
| 36 | 1 | 0 | 5.252431  | -1.480259 | -1.880553 |
| 37 | 1 | 0 | 2.974234  | -4.127538 | 0.626535  |
| 38 | 1 | 0 | 0.352704  | -2.259450 | 1.504852  |
| 39 | 1 | 0 | 0.548077  | -3.794459 | 0.655044  |
| 40 | 1 | 0 | 5.106073  | -3.562216 | -0.514371 |
| 41 | 1 | 0 | 1.048716  | 0.464853  | -1.603384 |
| 42 | 1 | 0 | 0.566391  | 0.572617  | 1.379733  |
| 43 | 6 | 0 | 2.305483  | 1.676801  | 1.079215  |
| 44 | 6 | 0 | 1.888515  | 2.726059  | 2.141903  |
| 45 | 1 | 0 | 2.780819  | 3.081497  | 2.670640  |
| 46 | 1 | 0 | 1.389772  | 3.589012  | 1.699820  |
| 47 | 1 | 0 | 1.218108  | 2.285674  | 2.892299  |
| 48 | 6 | 0 | 3.083338  | 0.584607  | 1.855588  |
| 49 | 1 | 0 | 3.886811  | 1.061864  | 2.428946  |
| 50 | 1 | 0 | 2.436855  | 0.063414  | 2.574099  |
| 51 | 1 | 0 | 3.543131  | -0.162395 | 1.208275  |
| 52 | 6 | 0 | 3.268694  | 2.339160  | 0.074550  |
| 53 | 1 | 0 | 4.114437  | 2.770301  | 0.624859  |
| 54 | 1 | 0 | 3.682832  | 1.615377  | -0.630697 |
| 55 | 1 | 0 | 2.783077  | 3.138693  | -0.485666 |

---
